# Supplementary material for: Self-assembled organic–inorganic hybrid silica with ionic liquid framework: a novel support for the catalytic enantioselective Strecker reaction of imines using Yb(OTf)3–pybox catalyst
Source: Royal Society of Chemistry journal article supplement (doi:10.1039/c0cc01426e), 2010-01-01
Supplement: c0cc01426e.pdf [file c0cc01426e.pdf]

**Supporting information for:**

**Self-Assembled Organic-Inorganic Hybrid Silica with Ionic Liquid Framework: A Novel Support for the Catalytic Enantioselective Strecker Reaction of Imines Using Yb(OTf)<sub>3</sub>-pybox Catalyst**

Babak Karimi,<sup>\*a</sup> Aziz Maleki,<sup>a</sup> Dawood Elhamifar,<sup>a</sup> James H. Clark,<sup>b</sup> Andrew J. Hunt<sup>b</sup>

<sup>a</sup>Department of Chemistry, Institute for Advanced Studies in Basic Sciences (IASBS),  
PO. Box 45195-1154, Gava Zang, Zanjan, Iran.

<sup>b</sup>Green Chemistry Centre of Excellence, University of York, York, YO10 5DD, UK

Corresponding author: E-mail; karimi@iasbs.ac.ir

## Table of Contents

|                                                                                                          | page |
|----------------------------------------------------------------------------------------------------------|------|
| 1. Experimental Procedure                                                                                | S3   |
| 1-1. General                                                                                             | S3   |
| 1-2. Preparation of 1,3-bis(3-trimethoxysilylpropyl) imidazolium iodide (BTMSPI)                         | S3   |
| 1-3. Synthesis of self supported ionic liquid under acidic condition                                     | S4   |
| 1-4. Preparation of the Chiral Ligand                                                                    | S6   |
| 1-5. General Procedure for the Preparation of Imine Substrate:                                           | S7   |
| 1-6. General Procedure for the Preparation of Ytterbium (III) Triflate Complex                           | S8   |
| 1-7. Immobilization of Yb(OTf) <sub>3</sub> -pybox Complex onto SSIL                                     | S8   |
| 1-8. General Catalytic Procedure                                                                         | S8   |
| 1-9. Recycling Experiment                                                                                | S8   |
| 1-10. Note for elucidating nature of Yb(OTf) <sub>3</sub> -pybox@SAILP                                   | S9   |
| 1-11. Characterizations of Products                                                                      | S10  |
| 1-11. Copy of, <sup>1</sup> H, <sup>13</sup> C-NMR, HPLC and FT-IR Spectra of α- Amino Nitril Derivative | S19  |
| 1-12. References                                                                                         | S107 |

## 1. Experimental Procedure:

**1-1. General:**  $^1\text{H}$  NMR spectra were recorded on commercial instruments (250 MHz). Chemical shifts were reported in ppm from tetramethylsilane with the solvent resonance as the internal standard ( $\text{CDCl}_3$ :  $\delta = 7.26$ ). Spectra are reported as follows: chemical shift (= ppm), multiplicity (s= singlet, d= doublet, t= triplet, q= quartet, m= multiplet), coupling constants (Hz), integration.  $^{13}\text{C}$  NMR spectra were collected on commercial instruments (62.90 MHz) with complete proton decoupling. The solid state silicon spectra were obtained using a Varian Unity Inova spectrometer operating at 59.56 MHz and the solid state carbon spectra were obtained using a Varian VNMRS spectrometer at 100.56 MHz. The enantiomeric excesses were determined by HPLC analysis on CHIRALPAK AD. Optical rotations were measured on a commercial polarimeter and reported as follows:  $[\alpha]_{\text{D}}^{\text{T}}$  (c = g/100 mL, solvent). Reagents obtained from commercial sources were used without further purification. Thermal treatments were conducted from room temperature to 800 °C in air flow using a Pheometric Scientific analyzer.

### 1-2. Preparation of 1,3-bis(3-trimethoxysilylpropyl)imidazolium iodide (BTMSPI) 1:

IL **1** was synthesized via a modification of a literature procedure<sup>1</sup>. In a well-dried two necked 200 mL Schlenk flask, 3-iodopropyl-trimethoxysilane (20.0 mmol) was added to a solution of sodium imidazolide (20.0 mmol) in absolute THF (120 mL) and stirred at 65 °C for 12h under an argon atmosphere. The reaction solution was then allowed to reach ambient temperature, after removal of the solvent under vacuum, the resulted mixture was added to another flask containing 20 mmol of 3-iodopropyl-trimethoxysilane in absolute toluene (100 mL) and refluxed for

36h with exclusion of light. The final solution was first washed with toluene ( $5 \times 30$  mL) and then absolute dichloromethane (30 mL) was added to precipitate of NaCl from the mixture. The supernatant solution was transferred to a well-dried flask and a yellow viscose ionic liquid was obtained after removing of solvent under reduced pressure. The spectral data for IL **1** is as follows:  $^1\text{H-NMR}$  (250 MHz,  $\text{CDCl}_3$ , 25 °C, TMS):  $\delta = 10.00$  (s, 1H, NCHN), 7.46 (d, 2H,  $J = 1.7$  Hz CHCH), 4.32 (t, 4H,  $J = 7.1$  Hz,  $\text{NCH}_2$ ), 3.6 (s, 18H, 6  $\text{OCH}_3$ ), 2.00 (m, 4H,  $\text{CH}_2\text{CH}_2\text{CH}_2$ ), 0.62 (t, 4H,  $J = 8.1$  Hz  $\text{SiCH}_2$ ).  $^{13}\text{C-NMR}$  (63 MHz,  $\text{CDCl}_3$ , 25 °C, TMS):  $\delta = 136.08$  (NCHN), 122.20 (CHCH), 51.76 ( $\text{NCH}_2$ ), 50.77 (OMe), 24.12 ( $\text{CH}_2\text{CH}_2\text{CH}_2$ ), 5.81 ( $\text{SiCH}_2$ ).

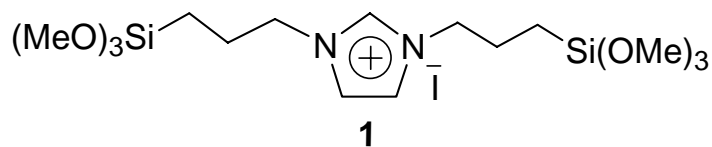

### 1-3. Synthesis of self-assembled ionic liquid (SAILP) under acidic condition

Typically, 40 mmol of 1,3-bis(3-trimethoxysilylpropyl)imidazolium iodide ionic liquid was added in 20 g of deionized water and 90 g of 2.0 M HCl solution with stirring at 40 °C for 24h under an argon atmosphere. The resulted mixture was then transferred into a Teflon-lined autoclave and heated at 100 °C for 72h under static conditions. The obtained mixture was first thoroughly washed with deionized water/ethanol solvent and then a yellow powder was obtained after drying of final material at room temperature.

The solid-state  $^{29}\text{Si}$  and  $^{13}\text{C}$  NMR spectroscopy of the SAILP material was investigated to demonstrate the presence of alkyl imidazolium group in the material framework. The  $^{29}\text{Si}$  spectra of the SAIL exhibits three peaks at -49.5, -58.5, -67.5 ppm corresponding, respectively, to  $\text{T}^1$  [ $\text{C-Si}(\text{OSi})(\text{OH})_2$ ],  $\text{T}^2$  [ $\text{C-Si}(\text{Osi})_2(\text{OH})$ ], and  $\text{T}^3$  [ $\text{C-Si}(\text{Osi})_3$ ] sites for Si species which are covalently bonded to carbon atoms. Interestingly, the absence of

any Q-type bonds in the Si spectrum significantly confirms the high stability of C-Si bands during the synthesis and washing conditions. Moreover, the higher intensity of T<sup>3</sup> band than T<sup>2</sup> and T<sup>1</sup> bands shows the high cross linking condensation and incorporation of ionic liquid moieties under applied conditions.

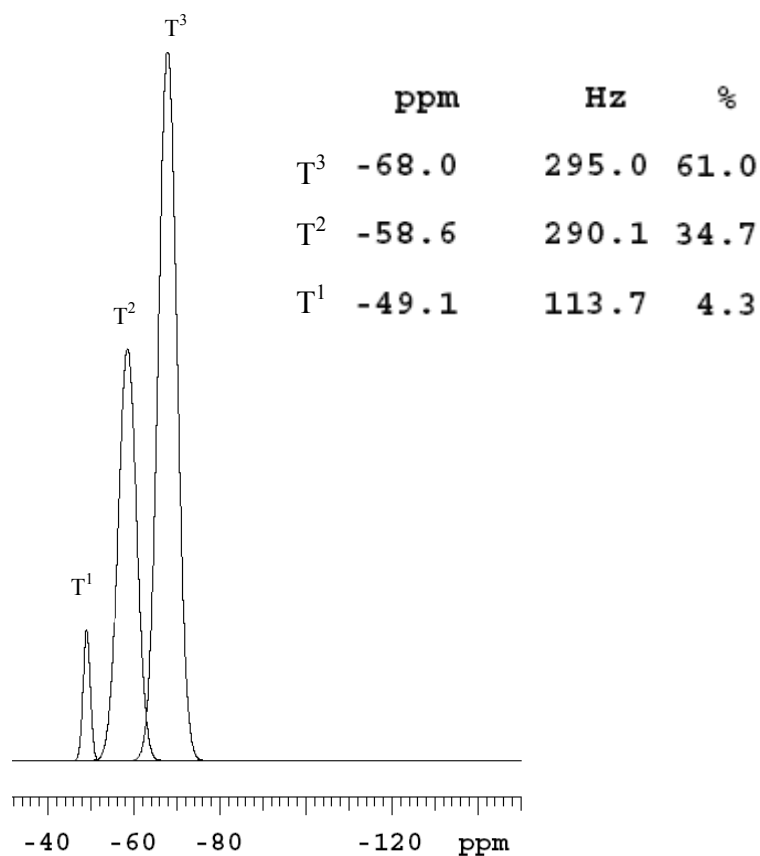

Figure1. Solid state <sup>29</sup>Si-NMR of the SSIL

The <sup>13</sup>C CP/MAS NMR spectrum of SAILP was also determined to clarify the characteristic signals of the IL bridging moiety. Fig. X illustrates the solid state <sup>13</sup>C NMR spectrum of this material, which can be assigned to the C species as follows:  $\delta$  (ppm) = 10.5 (SiCH<sub>2</sub>), 24.7 (CH<sub>2</sub>CH<sub>2</sub>CH<sub>2</sub>), 52.8 (CH<sub>2</sub>N), 123.6 (CHCH), and 136.7 (NCHN). This <sup>13</sup>C-solid state NMR spectrum goodly demonstrates that the ionic liquid groups were indeed well

incorporated intact into the material network. In addition, the absence of any further carbon peak confirms that almost all Si-C bonds survived intact under the acidic polycondensation.

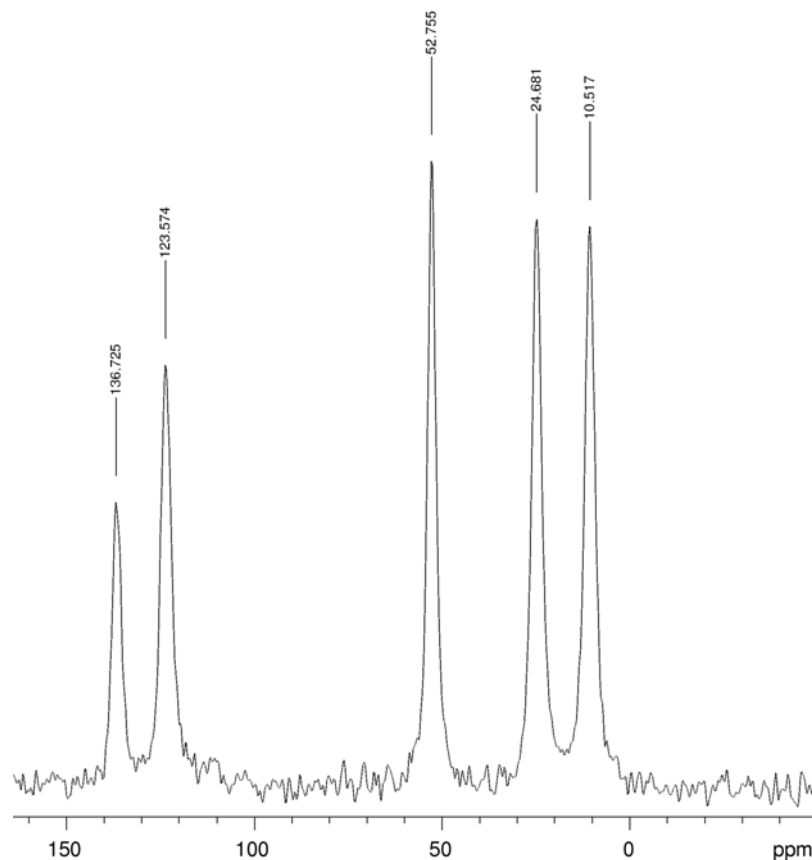

Figure 2. Solid state  $^{13}\text{C}$ -NMR of the SSIL

## 1-4. Preparation of the Chiral Ligand<sup>2</sup>

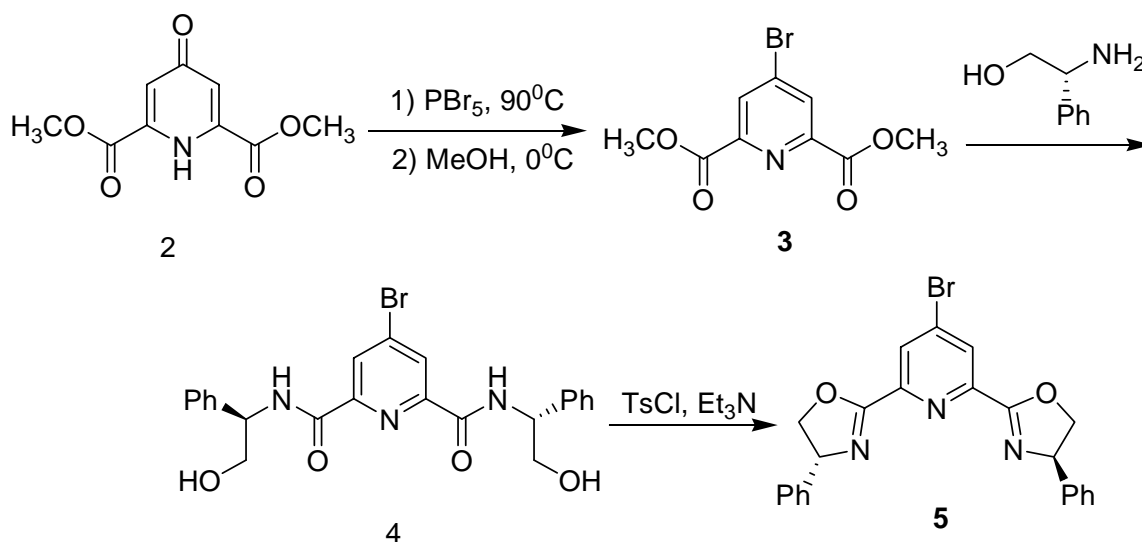

The preparation of chiral 4-bromopyridine-2,6-bis(oxazoline) ligand (**5**) was achieved according to a known procedure reported by Moberg *et al.* almost without any modification. The reaction sequences were demonstrated in the above reaction scheme.

**Compound 1:** m.p. 155-156 °C; <sup>1</sup>H NMR (250 MHz, CDCl<sub>3</sub>): δ = 8.40 (s, 2H), 3.97 (s, 6H); <sup>13</sup>C NMR (62.90 MHz, CDCl<sub>3</sub>): δ = 163.97, 149.05, 135.7, 131.27, 53.45.

**Compound 2:** m.p. 83-85 °C; <sup>1</sup>H NMR (250 MHz, CDCl<sub>3</sub>): δ = 8.50 (d, *J* = 7.5, 2H), 8.36 (s, 2H), 7.27 (m, 10H), 5.16 (m, 2H), 3.92 (d, *J* = 5.0 Hz, 4H), 2.94 (br s, 2H); <sup>13</sup>C NMR (62.90 MHz, CDCl<sub>3</sub>): δ = 162.5, 149.8, 138.7, 136.3, 128.8, 128.4, 127.9, 126.6, 66.9, 56.9.

**Compound 3:** m.p. 195-196 °C; <sup>1</sup>H NMR (250 MHz, CDCl<sub>3</sub>): δ = 8.51 (s, 2H), 7.29 (m, 10H), 5.44 (t, *J* = 7.5 Hz, 2H), 4.92 (t, *J* = 7.5 Hz, 2H), 4.42 (t, *J* = 10 Hz, 2H); <sup>13</sup>C NMR (62.90 MHz, CDCl<sub>3</sub>): δ = 162.5, 147.6, 141.3, 134.0, 129.4, 128.9, 127.9, 126.8, 75.7, 70.3.

**1-5. General Procedure for the Preparation of Imine Substrate:** the aldehyde (20 mmol) and diphenylmethanamine (20 mmol) and Na<sub>2</sub>SO<sub>4</sub> (0.5 gr) in dichloromethane (5 mL) were stirred in rt at 22 °C. The solution was filtrated and solvent was removed by vacuo. Products could be purified by recrystalyzation (Hexane-ethylacetate).

**1-6. General Procedure for the Preparation of Yb(OTf)<sub>3</sub>-pybox Complex:** A 2-dram oven-dried vial was charged with a stirbar, Yb(OTf)<sub>3</sub> (30 mg, 0.048 mmol), and the corresponding pybox ligand (44 mg, 0.098 mmol) in a dry box. The vial was capped with a septum and removed from the dry box. Dichloromethane (1.0 mL) was added to the vial under an atmosphere of dry Ar. The resulting mixture was stirred vigorously at room temperature for 1 h until the reaction becomes homogeneous.

**1-7. Immobilization of Yb(OTf)<sub>3</sub>-pybox Complex onto SAILP:** To the resulting complex solution in 1-6 were added 600 mg of the SAIL and 3cc other dichloromethane under argon and the resulting mixture was stirred for 12 h at rt. Then, dichloromethane was slowly removed under reduced pressure and the resulting free flowing yellow powder was then dried at 60 °C for overnight. Due to evaporation method almost all parts of catalysts were necessarily immobilize over the support. For further clarity, the amount of Yb was further determined by atomic absorption spectroscopy (AAS). AAS illustrated that the amount of Yb loaded onto the matrix was essentially the same with the amount of Yb(OTf)<sub>3</sub> that was used in the initial reaction mixture.

**1-8. General Catalytic Strecker Reaction Using Yb(OTf)<sub>3</sub>-pybox@SAILP:** To the obtained powder were added 1 mmol of corresponding imine and 0.5cc dichloromethane under argon and then resulting solution was cooled to the desired temperature. After 20 min TMSCN (2 mmol) and methanol (2 mmol) were added to the flask in one portion. The reaction was maintained at the desired temperature until consumption of imine was monitored by thin layer chromatography. After completion of the reaction 20cc *n*-hexane was added to the reaction mixture at the same temperature and then the products were separated from the heterogeneous



catalyst by filtration and were purified by flash chromatography on silica gel by THF/Hexane as eluent.

**1-9. Recycling Experiment:** the recycling experiment was performed according to the representative procedure described above. After separation of the catalyst and washing with 30 mL *n*-hexane, the catalyst was then dried in vacuum oven at 60 °C for overnight. The recycled catalyst was used directly for the next cycle.

**1-10. Note for elucidating nature of Yb(OTf)<sub>3</sub>-pybox@SAILP**

At the moment, we believe that our catalyst is physically adsorbed over SAILP. While the precise mechanism for this reaction is unclear at this stage; however, it seems reasonable that SAILP might function as both ionic support and also as ionic liquid supported reaction media. To elucidate whether the Yb(OTf)<sub>3</sub>-pybox-complex is chemically or physically adsorbed into solid support, the Yb(OTf)<sub>3</sub>-pybox@SAILP was thoroughly washed with MeOH. The resulting washed solid was then tested in the asymmetric Strecker reaction of *N*-benzylidenediphenylmethanamine under standard reaction conditions (Scheme 1).

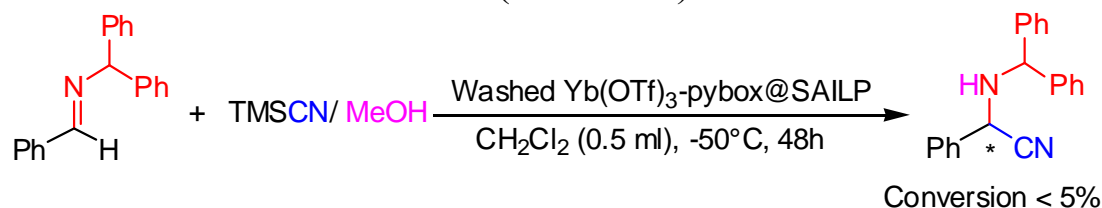

**Scheme 1**

Interestingly, the result demonstrated that only 5% conversion was observed after 48 h at -50 °C confirming that almost all Yb(OTf)<sub>3</sub>-pybox-complex is removed through washing process with polar solvents such as MeOH. This study clearly proves the nature of physical immobilization of Yb(OTf)<sub>3</sub>-pybox on the SAILP material. On the other hand, in a separate experiment Yb(OTf)<sub>3</sub>-pybox@SAILP was washed with CH<sub>2</sub>Cl<sub>2</sub> at -50 °C. The resulting washed solid was then tested in the asymmetric Strecker reaction of *N*-benzylidenediphenylmethanamine under standard reaction

conditions. Interestingly, using this catalyst reaction went to completion within 36 h under our described conditions and the corresponding  $\alpha$ -aminonitriles was isolated in 94% yield and 76% ee. The above-mentioned results together may clearly show that while the catalyst is physically adsorbed, under the described reaction condition, the catalyst acts in a heterogeneous pathway.

### 1-11. Characterizations of Products:

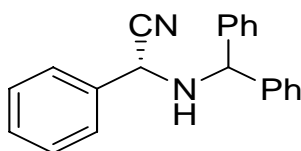

**(Benzhydryl-amino)- phenyl-acetonitrile:** The crude material was purified by flash chromatography on silica gel (THF/Hexane, 1:40) to afford the product in 95% yield as a white solid. The chromatographed material was determined to be of 80% ee by chiral HPLC analysis [Chiralpak AD, 90-10 *n*-hexane/*i*PrOH, 1.0 mL/min]; m.p. 94-96 °C;  $[\alpha]_D^{20} = 54.16$  ( $c = 0.12$  in  $\text{CHCl}_3$ ).  $^1\text{H}$  NMR (250 MHz,  $\text{CDCl}_3$ ):  $\delta = 7.61$ - $7.075$  (m, 15 H), 5.27 (s, 1 H), 4.62 (s, 1 H), 2.16 (s, 1 H) ppm.  $^{13}\text{C}$  NMR (62.90 MHz,  $\text{CDCl}_3$ ):  $\delta = 159.74, 142.73, 141.09, 134.92, 129.02, 128.80, 127.95, 127.73, 127.46, 127.26, 127.12, 118.78, 65.60, 52.39$  ppm.

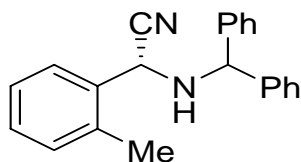

**(Benzhydryl-amino)-*o*-tolyl-acetonitrile:** The crude material was purified by flash chromatography on silica gel (THF/Hexane, 1:40) to afford the product in 94% yield as a white solid. The chromatographed material was determined to be of 79% ee by chiral HPLC analysis [Chiralpak AD, *n*-hexane/*i*PrOH, 90:10, 1.0 mL/min]; m.p. 106-108 °C,  $[\alpha]_D^{20} = 128.57$  ( $c = 0.28$  in  $\text{CHCl}_3$ ).

$^1\text{H}$  NMR (250 MHz,  $\text{CDCl}_3$ ):  $\delta = 7.61\text{-}7.22(\text{m}, 14 \text{ H}), 5.31 (\text{s}, 1 \text{ H}), 4.64 (\text{s}, 1 \text{ H}), 2.30 (\text{s}, 3 \text{ H}), 2.02 (\text{s}, 1 \text{ H}; \text{NH})$  ppm.  $^{13}\text{C}$  NMR (62.90 MHz,  $\text{CDCl}_3$ ):  $\delta = 142.80, 141.04, 136.48, 133.21, 131.16, 129.23, 128.92, 128.76, 128.09, 127.89, 127.67, 127.49, 127.00, 126.71, 118.80, 65.81, 50.35, 18.93$  ppm.

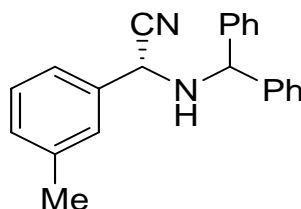

**(Benzhydryl-amino)-*m*-tolyl-acetonitrile:** The crude material was purified by flash chromatography on silica gel (THF/Hexane, 1:40) to afford the product in 93% yield as a white solid. The chromatographed material was determined to be of 71% ee by chiral HPLC analysis [Chiralpak AD, *n*-hexane/*i*PrOH, 90:10, 1.0 mL/min], m.p. 69-71 °C;  $[\alpha]_{\text{D}}^{20} = 27.85$  ( $c = 0.70$  in  $\text{CHCl}_3$ ).  $^1\text{H}$  NMR (250 MHz,  $\text{CDCl}_3$ ):  $\delta = 7.58\text{-}7.24 (\text{m}, 14 \text{ H}), 5.28 (\text{s}, 1 \text{ H}), 4.58 (\text{s}, 1 \text{ H}), 2.41 (\text{s}, 3 \text{ H}), 2.15 (\text{s}, 1 \text{ H})$  ppm.  $^{13}\text{C}$  NMR (62.90 MHz,  $\text{CDCl}_3$ ):  $\delta = 142.81, 141.17, 138.90, 134.90, 129.82, 129.04, 128.93, 128.80, 127.93, 127.72, 127.50, 127.18, 124.39, 118.92, 65.64, 52.41, 21.45$  ppm.

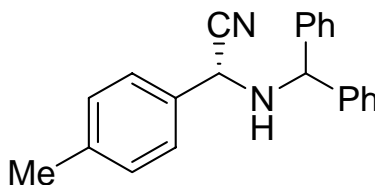

**(Benzhydryl-amino)-*p*-tolyl-acetonitrile:** The crude material was purified by flash chromatography on silica gel (THF/Hexane, 1:40) to afford the product in 86% yield as a white solid. The chromatographed material was determined to be of 77% ee by chiral HPLC analysis [Chiralpak AD, *n*-hexane/*i*PrOH, 90: 10, 1.0 mL/min], m.p. 104-106 °C.  $[\alpha]_{\text{D}}^{20} = 65.27$  ( $c = 0.16$  in  $\text{CHCl}_3$ ).  $^1\text{H}$

NMR (250 MHz, CDCl<sub>3</sub>):  $\delta$  = 7.63-7.24 (m, 14 H), 5.29 (s, 1 H), 4.60 (s, 1 H), 2.41 (s, 3 H), 2.16 (s, 1 H) ppm. <sup>13</sup>C NMR (62.90 MHz, CDCl<sub>3</sub>):  $\delta$  = 142.85, 141.27, 139.02, 132.09, 129.70, 129.06, 128.82, 127.94, 127.73, 127.50, 127.21, 127.18, 118.99, 65.60, 52.17, 21.23 ppm.

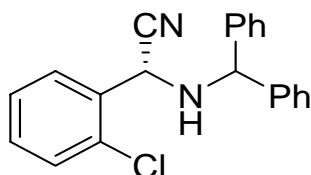

**(Benzhydryl-amino)-(2-chloro-phenyl)-acetonitrile:** The crude material was purified by flash chromatography on silica gel (THF/Hexane, 1:40) to afford the product in 58% yield as a white solid. The chromatographed material was determined to be of 71% ee by chiral HPLC analysis [Chiralpak AD, *n*-hexane/*i*PrOH, 95:5, 1.0 mL/min]; m.p. 98-100 °C,  $[\alpha]_D^{20} = 78.57$  (c = 0.14 in CHCl<sub>3</sub>). <sup>1</sup>H NMR (250 MHz, CDCl<sub>3</sub>):  $\delta$  = 7.59-7.02 (m, 14H), 5.25(s, 1 H), 4.91 (s, 1 H), 2.19 (s, 1 H) ppm. <sup>13</sup>C NMR (62.90 MHz, CDCl<sub>3</sub>):  $\delta$  = 142.60, 140.73, 133.49, 132.79, 130.58, 130.42, 129.26, 128.84, 128.78, 128.00, 127.74, 127.70, 127.60, 127.17, 118.17, 65.66, 50.23 ppm.

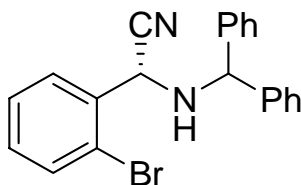

**(Benzhydryl-amino)-(2-bromo-phenyl)-acetonitrile:** The crude material was purified by flash chromatography on silica gel (THF/Hexane, 1:40) to afford the product in 81% yield as a white solid. The chromatographed material was determined to be of 86% ee by chiral HPLC analysis [Chiralpak AD, *n*-hexane/*i*PrOH, 90:10, 1.0 mL/min]; m.p. 101-103 °C,  $[\alpha]_D^{22} = 34.61$  (c = 0.13 in

CHCl<sub>3</sub>). <sup>1</sup>H NMR (250 MHz, CDCl<sub>3</sub>): δ = 7.90-7.24(m, 14H), 5.23(s, 1 H), 4.89 (s, 1 H), 2.12 (s, 1 H) ppm. <sup>13</sup>C NMR (62.90 MHz, CDCl<sub>3</sub>): δ = 142.55, 140.67, 134.51, 133.76, 130.77, 129.42, 128.77, 128.24, 128.01, 127.88, 127.73, 127.18, 123.42, 118.21, 65.63, 52.51 ppm.

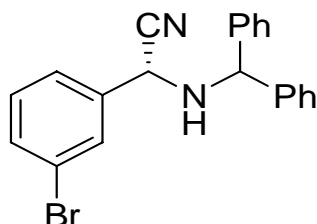

**(Benzhydryl-amino)-(3-bromo-phenyl)-acetonitrile:** The crude material was purified by flash chromatography on silica gel (THF/Hexane, 1:40) to afford the product in 71% yield as a white solid. The chromatographed material was determined to be of 53% ee by chiral HPLC analysis [Chiralpak AD, *n*-hexane/*i*PrOH, 95:5, 1.0 mL/min]; m.p. 102-104 °C, [α]<sub>D</sub><sup>20</sup> = 215 (c = 0.21 in CHCl<sub>3</sub>). <sup>1</sup>H NMR (250 MHz, CDCl<sub>3</sub>): δ = 7.72-7.25 (m, 14 H), 5.25(s, 1 H), 4.58 (s, 1 H), 2.17 (s, 1 H) ppm. <sup>13</sup>C NMR (62.90 MHz, CDCl<sub>3</sub>): δ = 142.48, 140.78, 137.02, 132.27, 130.54, 130.36, 129.14, 128.86, 128.10, 127.85, 127.47, 127.12, 125.93, 123.02, 118.20, 65.66, 51.83 ppm

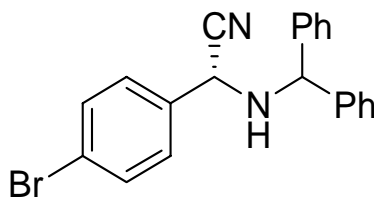

**(Benzhydryl-amino)-(4-bromo-phenyl)-acetonitrile:** The crude material was purified by flash chromatography on silica gel (THF/Hexane, 1:40) to afford the product in 88% yield as a white solid. The chromatographed material was determined to be of 71% ee by chiral HPLC analysis [Chiralpak AD, *n*-hexane/*i*PrOH, 90:10, 1.0 mL/min], m.p. 99-101 °C, [α]<sub>D</sub><sup>20</sup> = 13.17 (c = 0.41 in CHCl<sub>3</sub>). <sup>1</sup>H NMR (250 MHz, CDCl<sub>3</sub>): δ = 7.76-7.22 (m, 14 H),

5.25 (s, 1 H), 4.57 (s, 1 H), 2.17 (s, 1 H) ppm.  $^{13}\text{C}$  NMR (62.90 MHz,  $\text{CDCl}_3$ ):  $\delta = 142.52, 140.87, 133.93, 132.16, 129.12, 128.95, 128.86, 128.07, 127.83, 127.44, 127.07, 123.21, 118.34, 65.62, 51.85$  ppm.

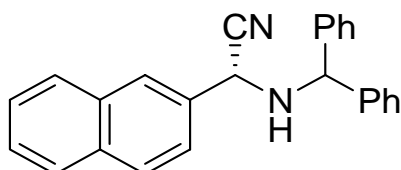

**(Benzhydryl-amino)-naphthalen-2-yl-acetonitrile** : The crude material was purified by flash chromatography on silica gel (THF/Hexane, 1:40) to afford the product in 92% yield as a white solid. The chromatographed material was determined to be of 74% ee by chiral HPLC analysis [Chiralpak AD, *n*-hexane/*i*PrOH, 90:10, 1.0 mL/min]; m.p. 119-121 °C,  $[\alpha]_{\text{D}}^{20} = 20.62$  ( $c = 0.16$  in  $\text{CHCl}_3$ ).  $^1\text{H}$  NMR (250 MHz,  $\text{CDCl}_3$ ):  $\delta = 7.94\text{-}7.04$  (m, 17 H), 5.36 (s, 1 H), 4.79 (s, 1 H), 2.28 (s, 1 H) ppm.  $^{13}\text{C}$  NMR (62.90 MHz,  $\text{CDCl}_3$ ):  $\delta = 142.80, 141.23, 133.40, 133.10, 132.26, 129.15, 129.03, 128.87, 128.22, 128.05, 127.80, 127.59, 127.20, 126.91, 126.82, 126.35, 124.91, 118.87, 65.76, 52.60$  ppm.

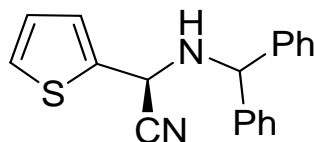

**(Benzhydryl-amino)-thiophen-2-yl-acetonitrile**: The crude material was purified by flash chromatography on silica gel (THF/Hexane, 1:40) to afford the product in 55% yield as a white solid. The chromatographed material was determined to be of 82% ee by chiral HPLC analysis [Chiralpak AD, *n*-hexane/*i*PrOH, 90:10, 1.0 mL/min], m.p. 83-85 °C,  $[\alpha]_{\text{D}}^{24} = 30.00$  ( $c = 0.12$  in  $\text{CHCl}_3$ ).  $^1\text{H}$  NMR (250 MHz,  $\text{CDCl}_3$ ):  $\delta = 7.63\text{-}7.00$  (m, 13 H),

5.27 (s, 1 H), 4.80 (s, 1 H), 2.41 (s, 1 H) ppm.  $^{13}\text{C}$  NMR (62.90 MHz,  $\text{CDCl}_3$ ):  $\delta = 142.54, 140.84, 138.30, 129.14, 128.89, 128.08, 127.86, 127.36, 127.14, 126.95, 126.70, 126.09, 118.17, 65.41, 48.19$  ppm.

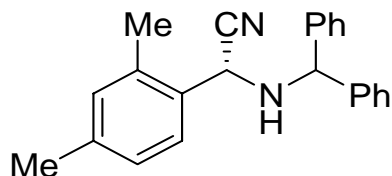

**(Benzhydryl-amino)-(2,4-dimethyl-phenyl)-acetonitrile:** The crude material was purified by flash chromatography on silica gel (THF/Hexane, 1:40) to afford the product in 81% yield as a white solid. The chromatographed material was determined to be of 72% ee by chiral HPLC analysis [Chiralpak AD, *n*-hexane/*i*PrOH, 90:10, 1.0 mL/min], m.p. 123-125 °C,  $[\alpha]_{\text{D}}^{20} = 360$  ( $c = 0.21$  in  $\text{CHCl}_3$ ).  $^1\text{H}$  NMR (250 MHz,  $\text{CDCl}_3$ ):  $\delta = 7.61-7.06$  (m, 13 H), 5.29 (s, 1 H), 4.60 (d,  $J = 10$  Hz, 1 H), 2.35 (s, 3H), 2.27 (s, 3H), 2.01 (d,  $J = 12.5$  Hz, 1 H), ppm.  $^{13}\text{C}$  NMR (62.90 MHz,  $\text{CDCl}_3$ ):  $\delta = 142.87, 141.13, 139.12, 136.24, 131.95, 130.36, 128.89, 128.74, 128.04, 127.86, 127.63, 127.47, 127.29, 126.99, 118.94, 65.78, 50.09, 21.08, 18.85$  ppm.

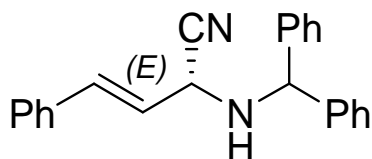

**2-(Benzhydryl-amino)-4-phenyl-but-3-enenitrile:** The crude material was purified by flash chromatography on silica gel (THF/Hexane, 1:40) to afford the product in 97% yield as a white solid. The chromatographed material was determined to be of 90% ee by chiral HPLC analysis [Chiralpak AD, *n*-hexane/*i*PrOH, 90:10, 1.0 mL/min], m.p. 90-92 °C,  $[\alpha]_{\text{D}}^{20} = 27.89$  ( $c = 0.19$  in

CHCl<sub>3</sub>). <sup>1</sup>H NMR (250 MHz, CDCl<sub>3</sub>): δ = 7.64-7.03 (m, 15 H), 6.91 (d, *J* = 17.5 Hz, 1 H), 6.23 (dd, <sup>1</sup>*J* = 17.5 <sup>2</sup>*J* = 5 Hz, 1 H), 5.22 (s, 1 H), 4.24 (s, 1 H), 1.01 (d, *J* = 12.5 Hz, 1 H), ppm. <sup>13</sup>C NMR (62.90 MHz, CDCl<sub>3</sub>): δ = 142.77, 141.02, 135.28, 133.81, 128.98, 128.81, 128.75, 128.61, 127.90, 127.73, 127.42, 127.11, 126.82, 122.35, 118.31, 65.37, 50.10 ppm.

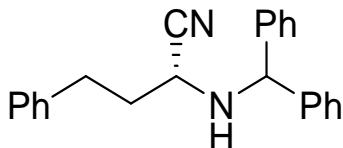

**2-(Benzhydryl-amino)-4-phenyl-butyronitrile:** The crude material was purified by flash chromatography on silica gel (THF/Hexane, 1:50) to afford the product in 91% yield as a white solid. The chromatographed material was determined to be of 44% ee by chiral HPLC analysis [Chiralpak AD, *n*-hexane/*i*PrOH, 98:2, 1.0 mL/min], m.p. 79-80 °C, [ $\alpha$ ]<sub>D</sub><sup>20</sup> = 39.56 (c = 0.44 in CHCl<sub>3</sub>). <sup>1</sup>H NMR (250 MHz, CDCl<sub>3</sub>): δ = 7.55-7.21 (m, 15 H), 5.23 (s, 1 H), 3.47 (s, 1 H), 2.90 (t, *J* = 7.5 Hz, 2 H), 2.15 (q, *J* = 7.5 Hz, 2 H), 1.91 (s, 1 H) ppm. <sup>13</sup>C NMR (62.90 MHz, CDCl<sub>3</sub>): δ = 143.29, 141.31, 140.17, 128.95, 128.86, 128.71, 128.47, 127.85, 127.75, 127.56, 127.18, 126.49, 120.22, 65.63, 47.96, 35.40, 31.88 ppm.

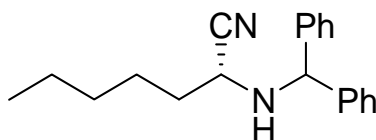

**2-(Benzhydryl-amino)-heptanenitrile:** The crude material was purified by flash chromatography on silica gel (THF/Hexane, 1:60) to afford the product in 85% yield as oil. The chromatographed material was determined to be of 45% ee by chiral HPLC analysis [Chiralpak AD, *n*-hexane/*i*PrOH, 95:5, 1.0 mL/min], m.p. 99-101 °C, [ $\alpha$ ]<sub>D</sub><sup>20</sup> = 45.96 (c = 0.5 in CHCl<sub>3</sub>). <sup>1</sup>H NMR (250 MHz, CDCl<sub>3</sub>): δ = 7.55-7.27 (m, 10 H), 5.21 (s, 1 H), 3.41 (s, 1 H), 1.81



(m, 3 H), 1.55 (m, 2 H), 1.33(m, 4 H), 0.97(m, 3 H) ppm.  $^{13}\text{C}$  NMR (62.90 MHz,  $\text{CDCl}_3$ ):  $\delta = 143.59, 141.78, 128.99, 128.84, 127.85, 127.69, 127.60, 127.28, 120.45, 65.66, 48.53, 33.73, 31.34, 25.43, 22.59, 14.20$  ppm.

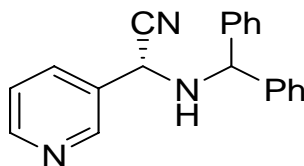

**(Benzhydryl-amino)-pyridin-3-yl-acetonitrile:** The crude material was purified by flash chromatography on silica gel (THF/Hexane, 1:30) to afford the product in 95% yield as a yellow solid. The chromatographed material was determined to be of 71% ee by chiral HPLC analysis [Chiralpak AD, *n*-hexane/*i*PrOH, 90:10, 1.0 mL/min], m.p. 115-117 °C,  $[\alpha]_{\text{D}}^{20} = 49.05$  ( $c = 0.21$  in  $\text{CHCl}_3$ ).  $^1\text{H}$  NMR (250 MHz,  $\text{CDCl}_3$ ):  $\delta = 8.76$  (s, 1H), 8.58 (d,  $J = 5$  Hz, 1 H), 7.86 (d,  $J = 7.5$  Hz, 1 H), 7.56 (d,  $J = 7.5$  Hz, 2 H), 7.45-7.21 (m, 8H), 4.63 (d,  $J = 10$  Hz, 1 H), 2.31 (d,  $J = 10$  Hz, 1 H) ppm.  $^{13}\text{C}$  NMR (62.90 MHz,  $\text{CDCl}_3$ ):  $\delta = 150.26, 148.78, 142.38, 140.73, 134.81, 130.85, 129.16, 128.86, 128.14, 127.85, 127.44, 127.05, 123.65, 117.81, 65.70, 50.30$  ppm.

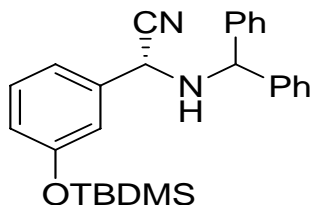

**(Benzhydryl-amino)-[3-(tert-butyl-dimethyl-silyloxy)-phenyl]-acetonitrile:** The crude material was purified by flash chromatography on silica gel (THF/Hexane, 1:40) to afford the product in 89% yield as a white solid. The chromatographed material was determined to be of 60% ee by chiral HPLC analysis [Chiralpak AD, *n*-hexane/*i*PrOH, 98:2, 1.0 mL/min], m.p. 89-91

$^{\circ}\text{C}$ ,  $[\alpha]_{\text{D}}^{20} = 350.43$  ( $c = 0.13$  in  $\text{CHCl}_3$ ).  $^1\text{H}$  NMR (250 MHz,  $\text{CDCl}_3$ ):  $\delta = 7.58\text{-}6.84$  (m, 14 H), 5.23 (s, 1 H), 4.55 (s, 1 H), 2.18 (s, 1 H), 1.01 (s, 9 H), 0.24 (s, 6 H) ppm.  $^{13}\text{C}$  NMR (62.90 MHz,  $\text{CDCl}_3$ ):  $\delta = 156.19, 142.74, 141.18, 136.35, 130.01, 129.01, 128.80, 127.93, 127.71, 127.45, 127.11, 120.65, 120.01, 119.00, 118.76, 65.54, 52.11, 25.70, 18.26, -4.34$  ppm.

## 1-11. Copy of, $^1\text{H}$ , $^{13}\text{C}$ -NMR, HPLC and FT-IR spectra of $\alpha$ - amino nitril derivatives

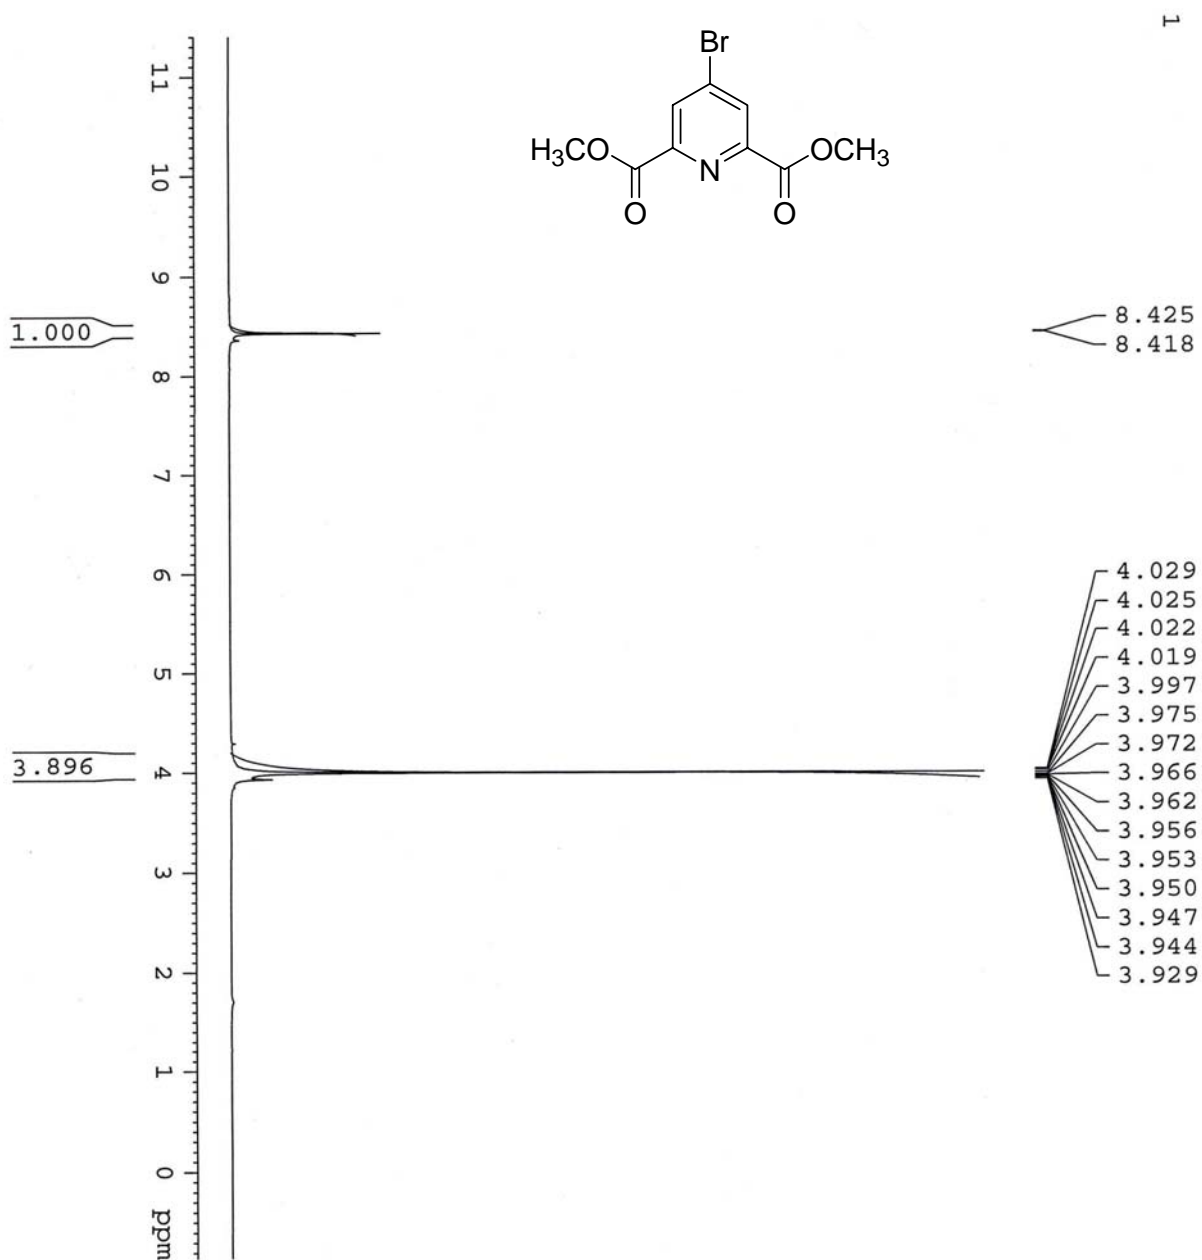

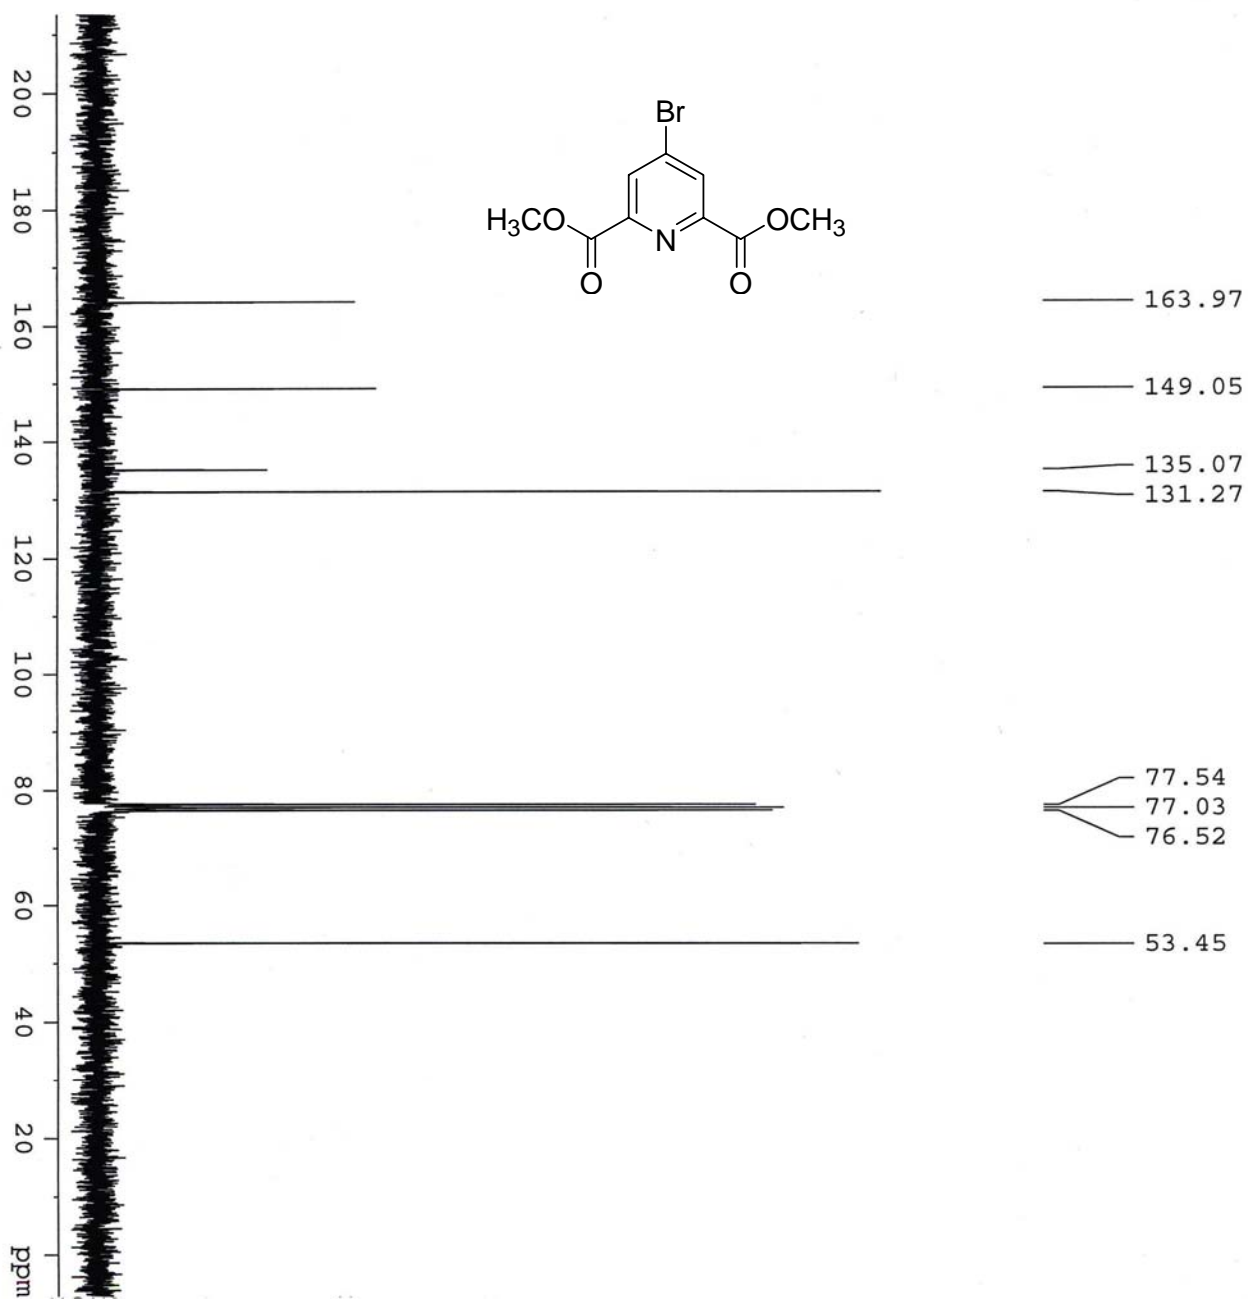

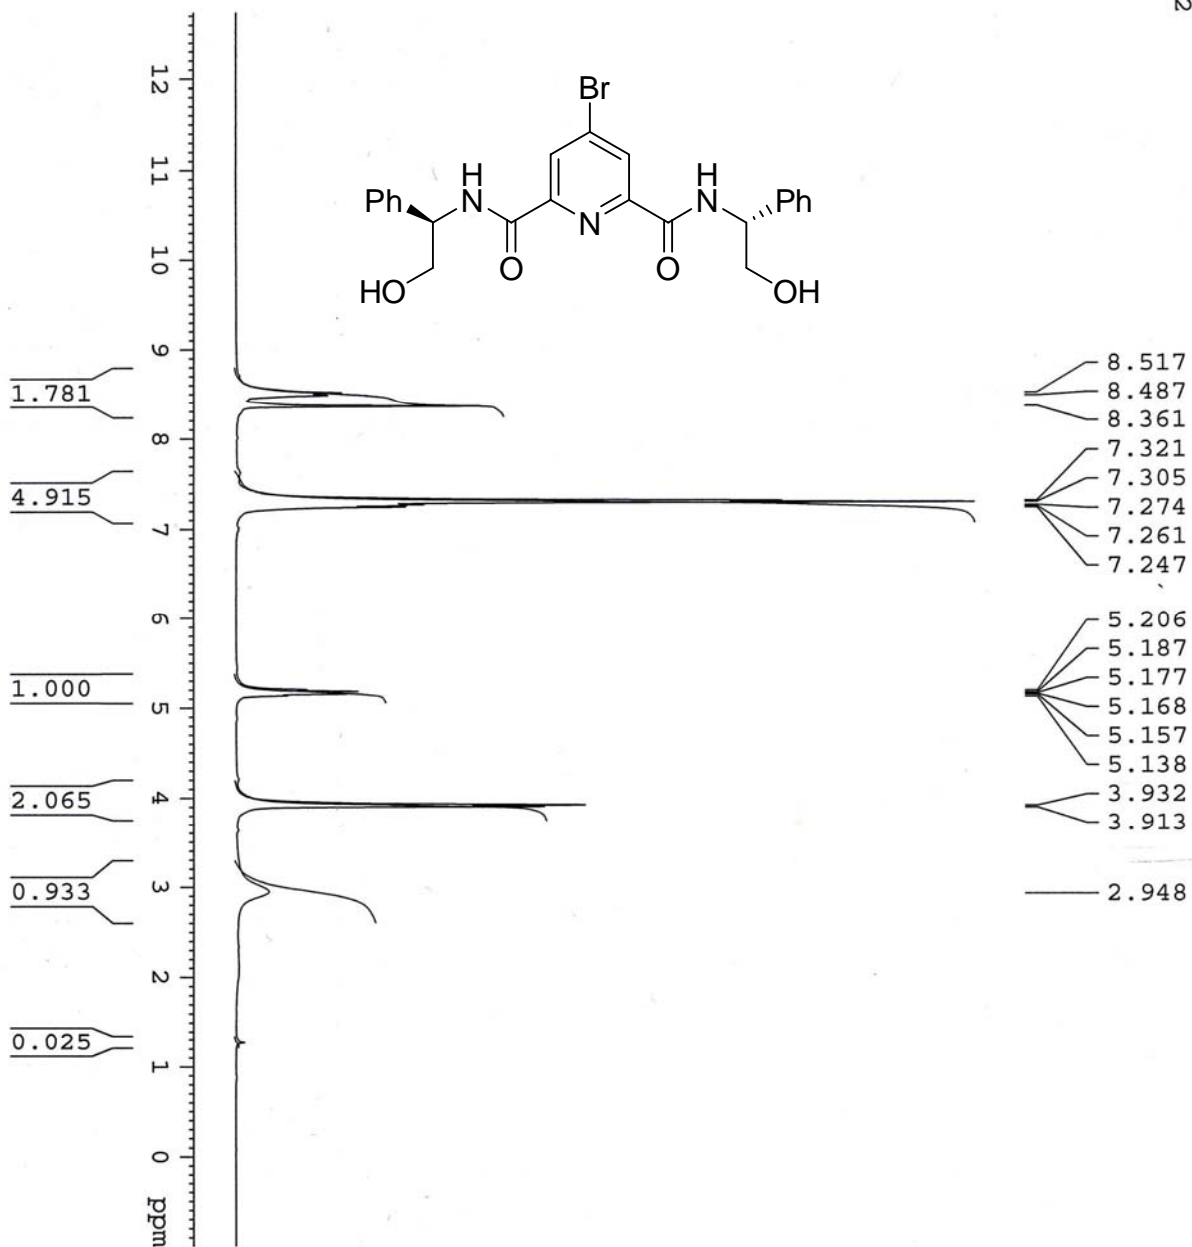

2

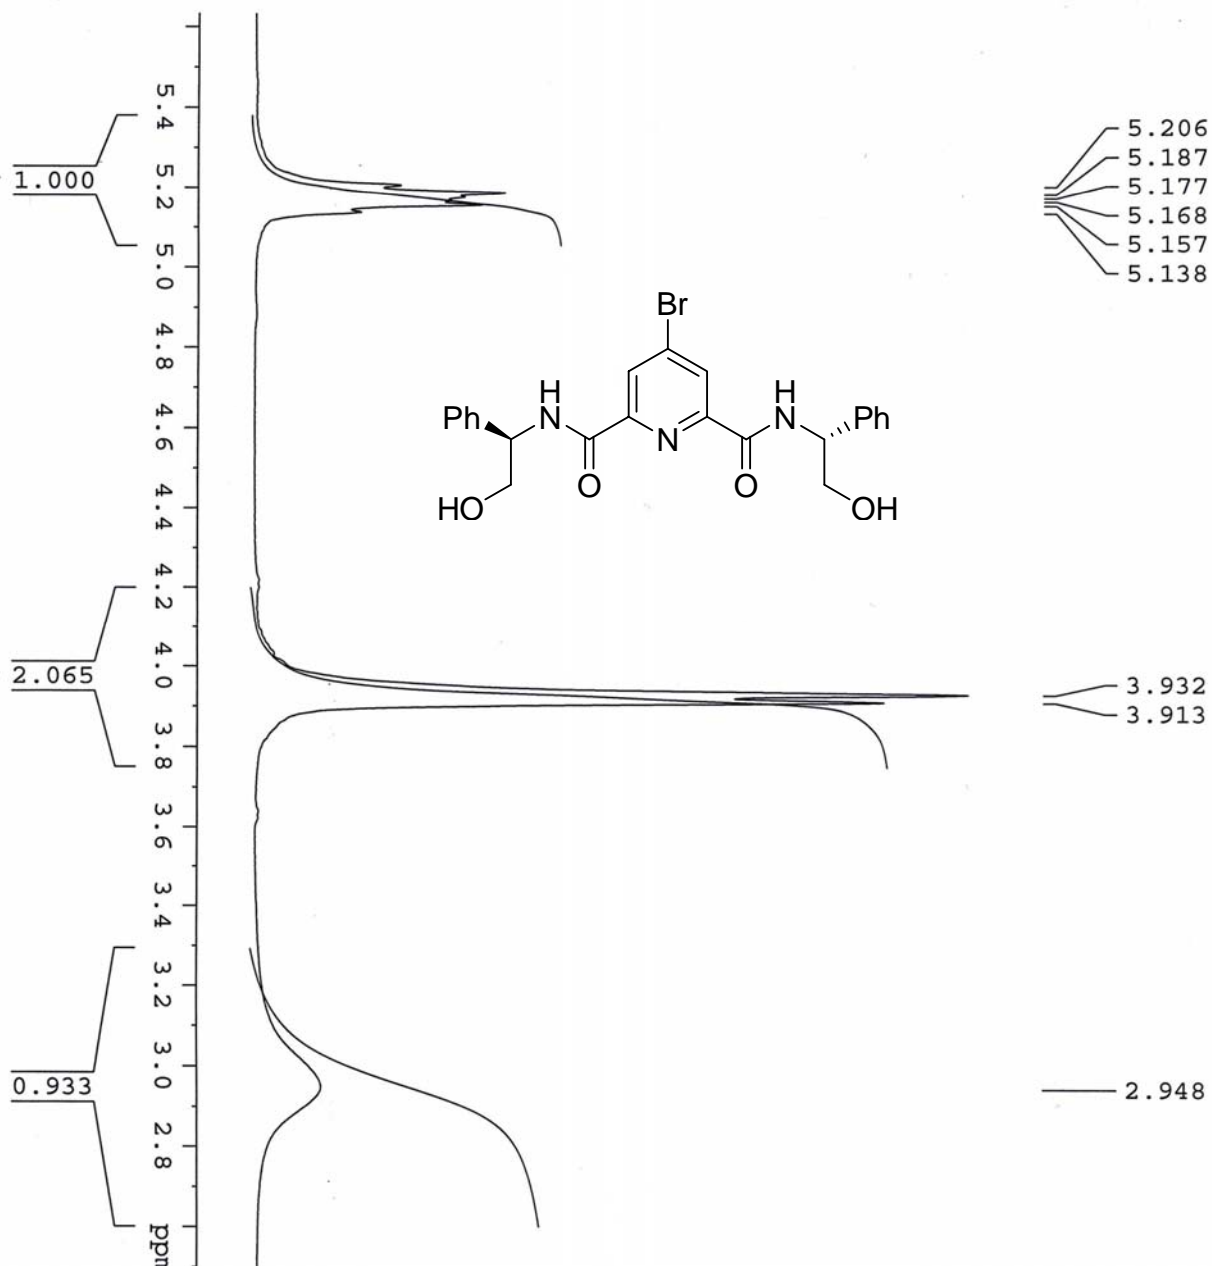

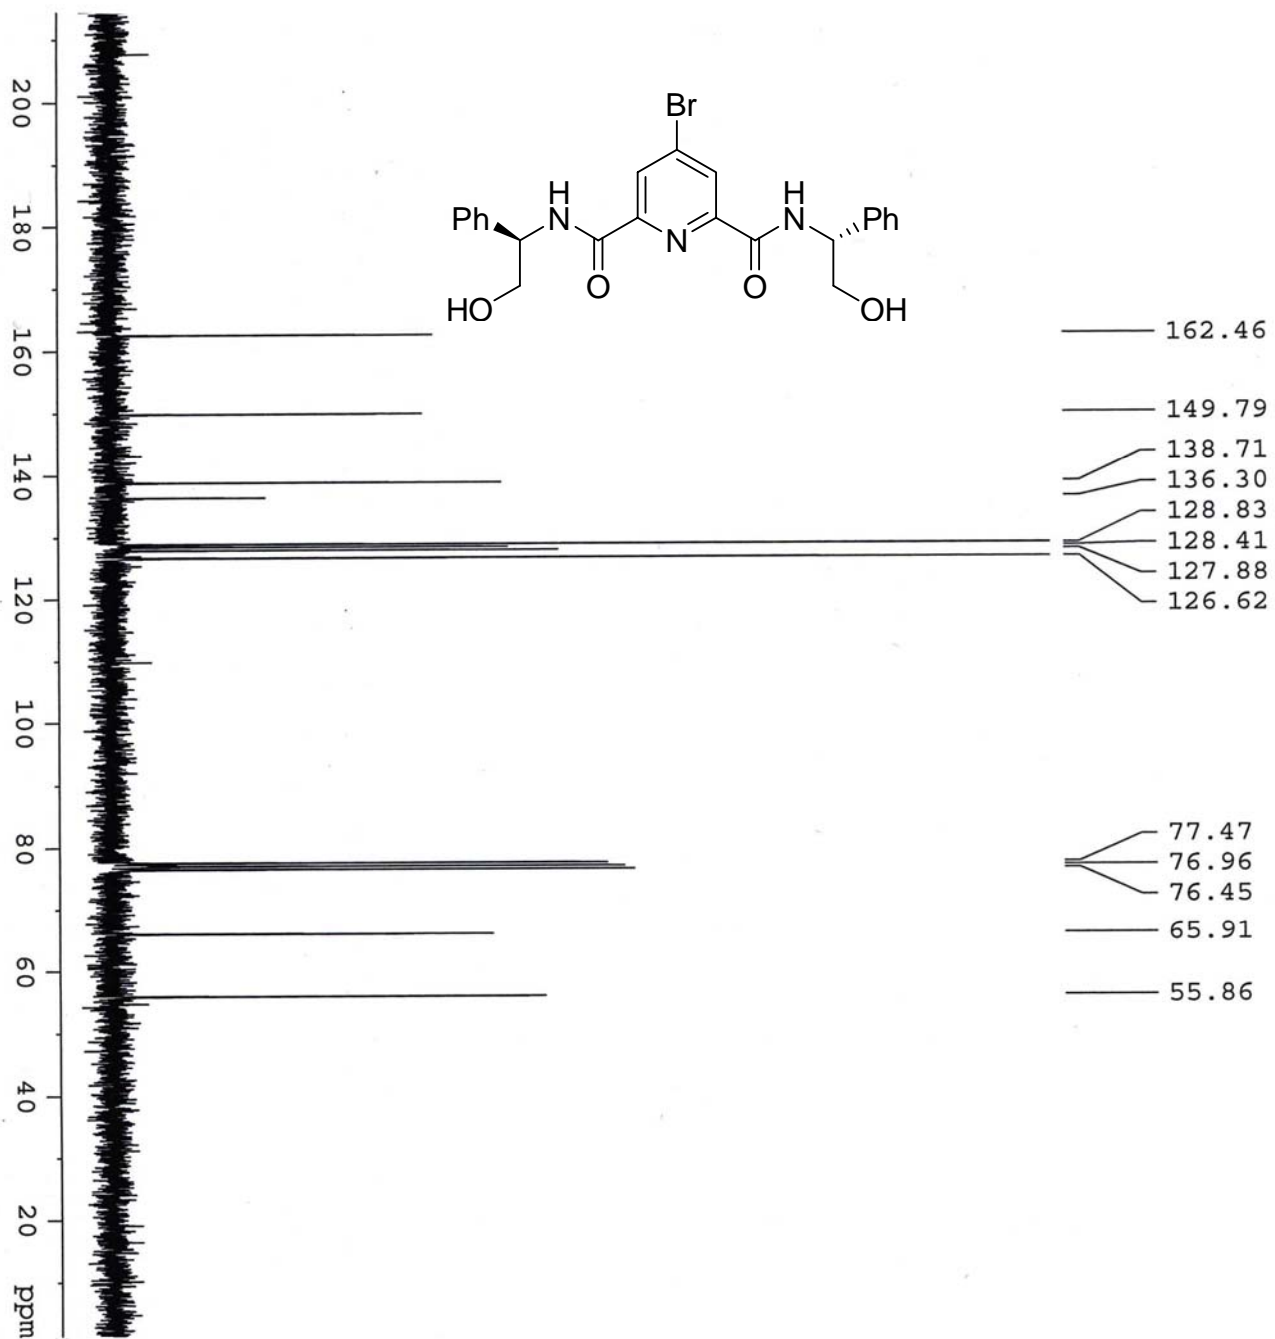

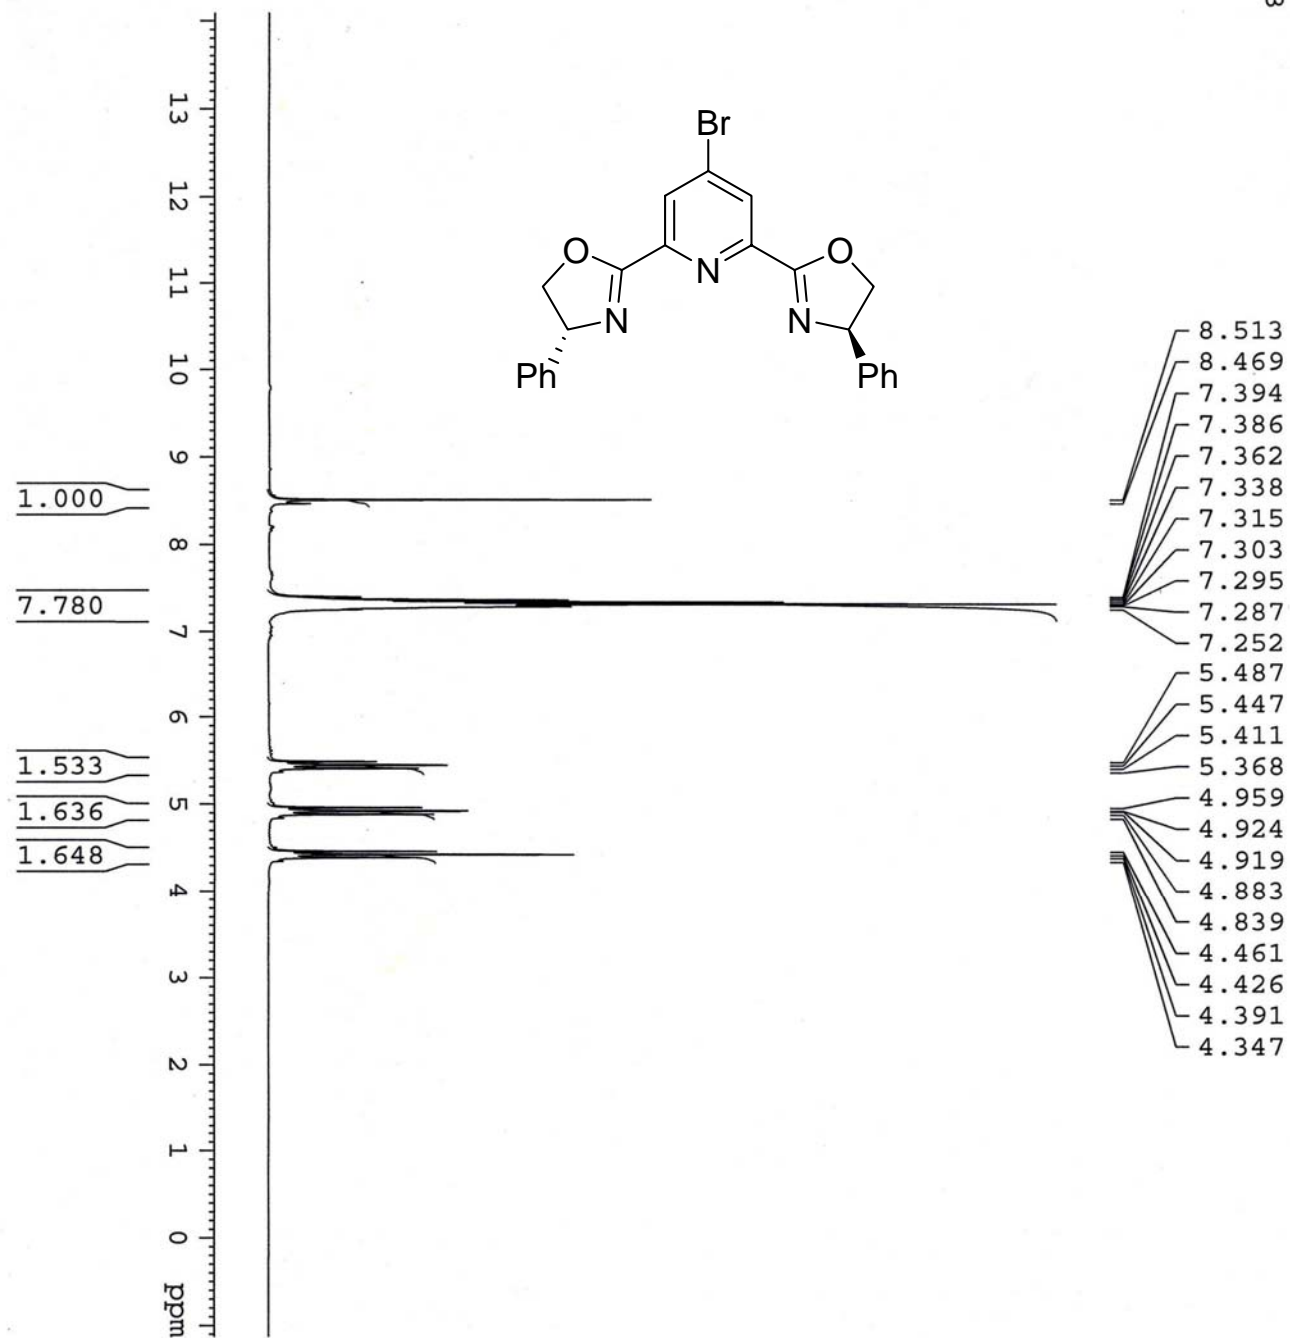



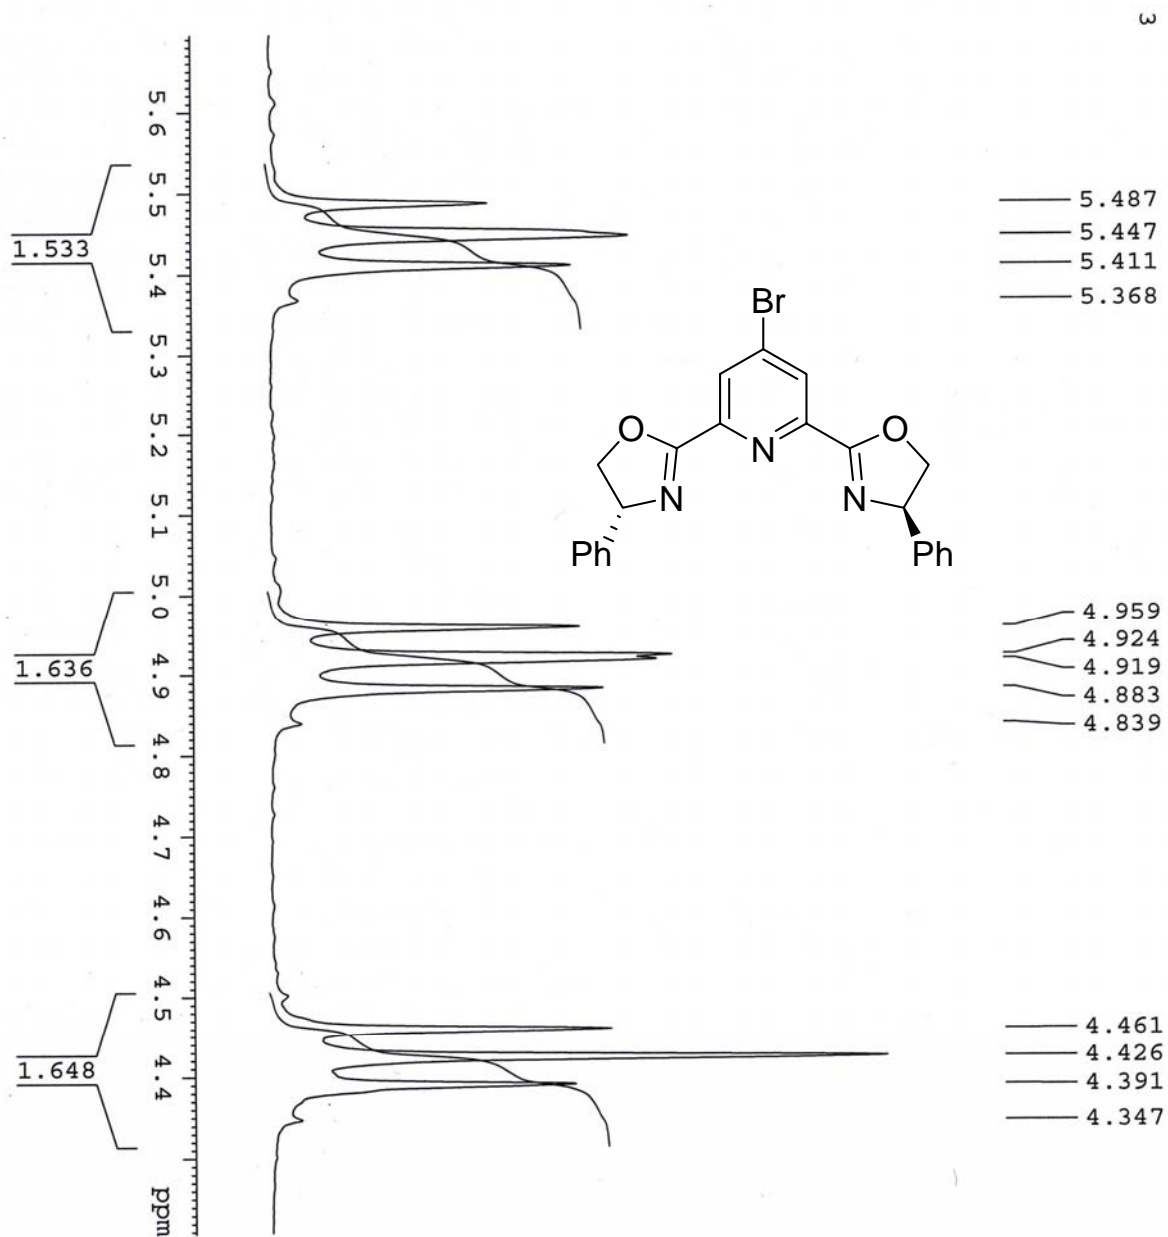

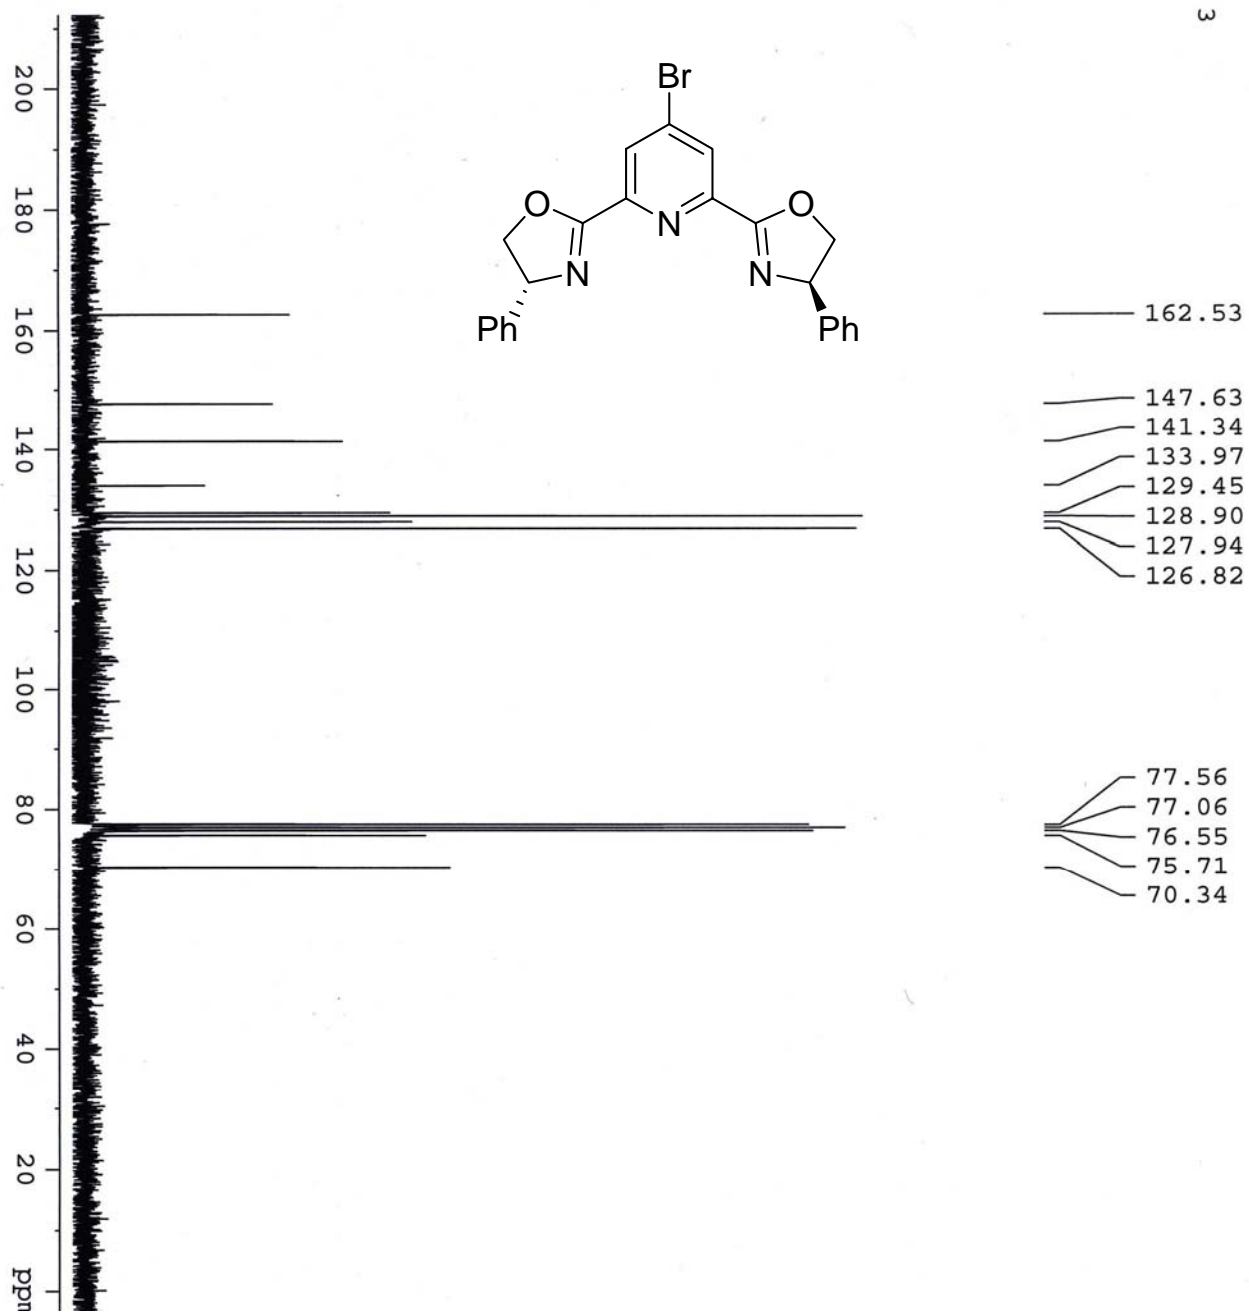

Table2, entry 1

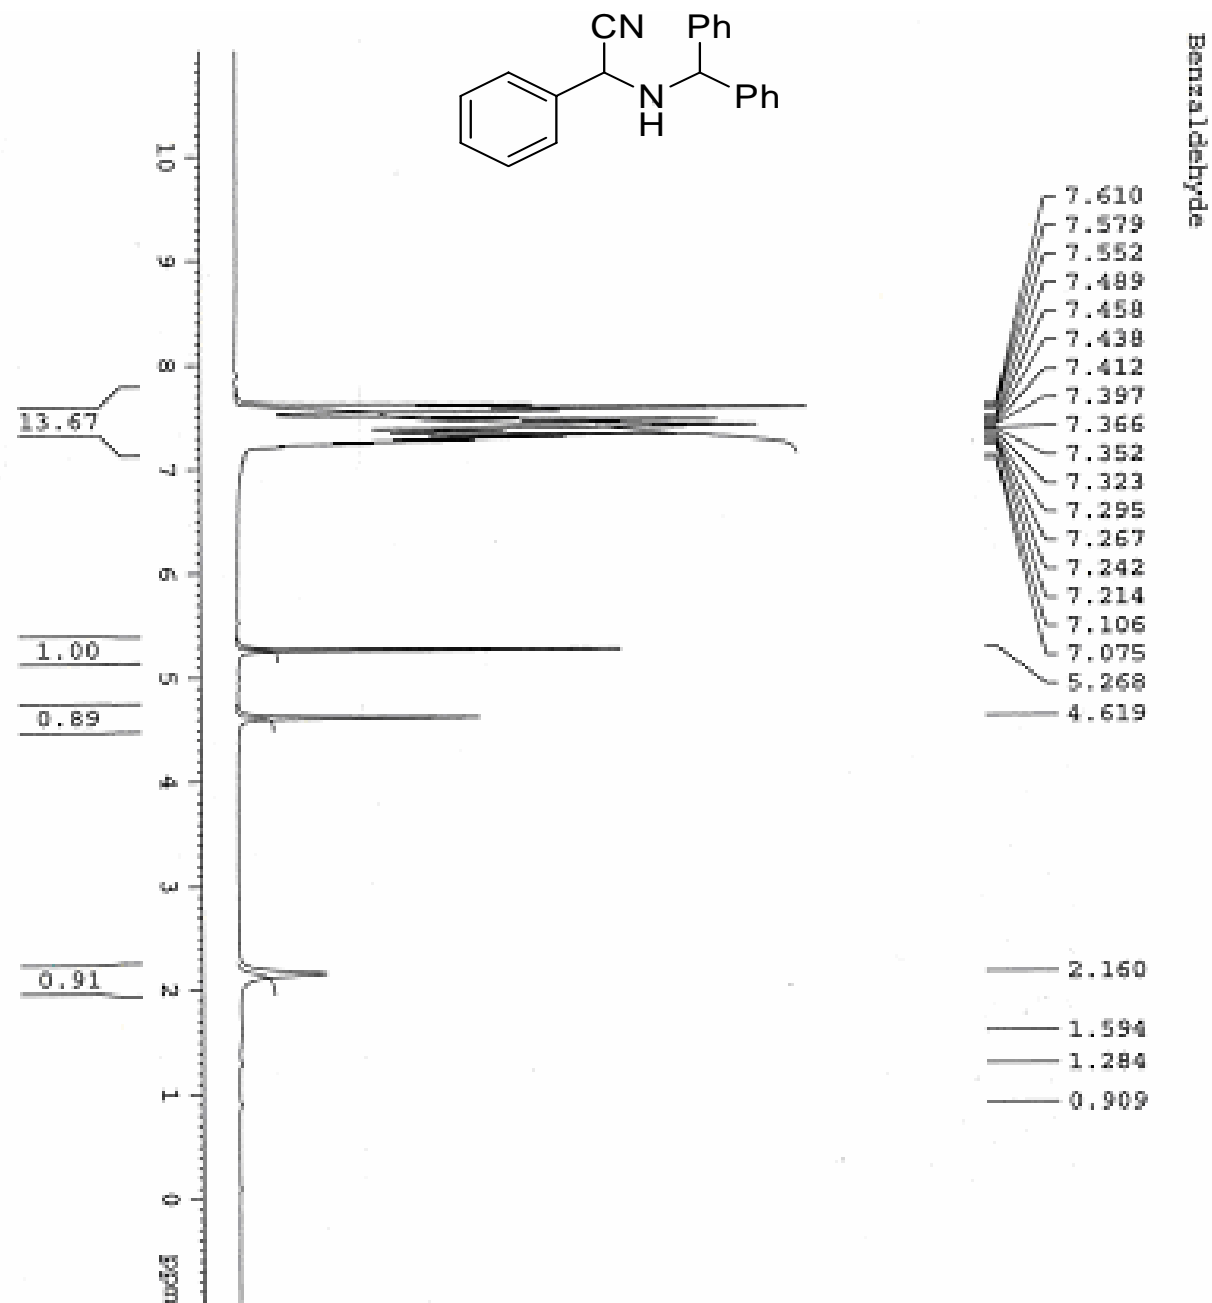

Table2, entry 1

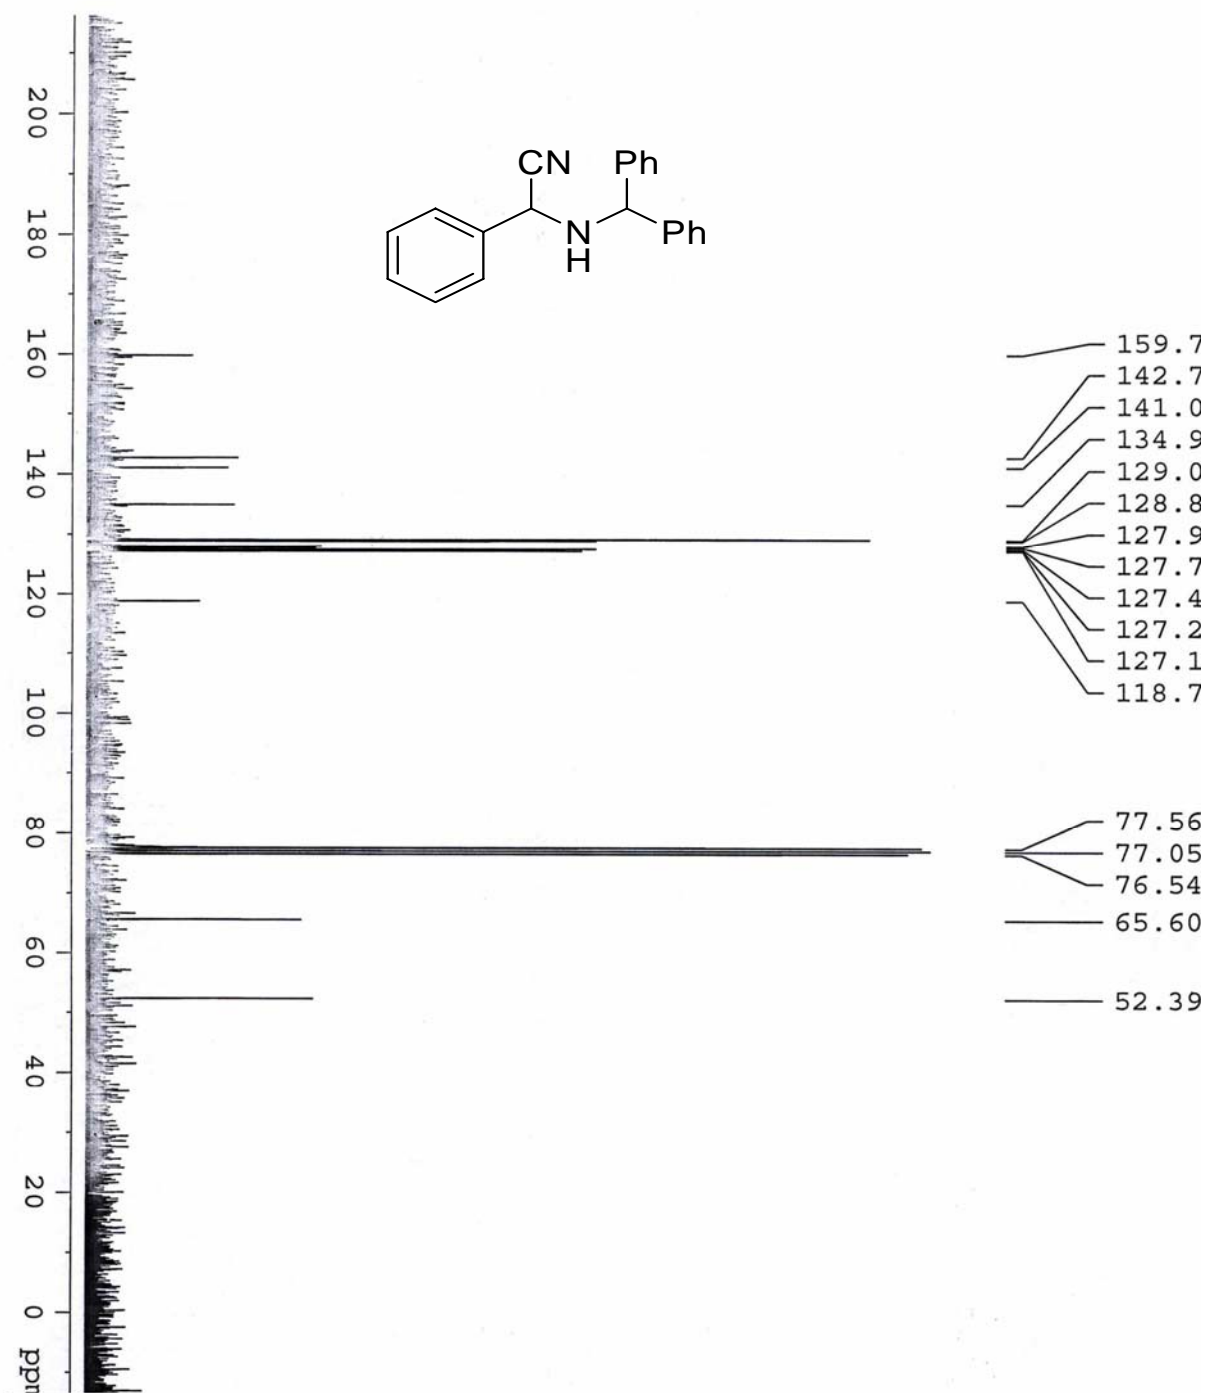

**Table2, entry 1**

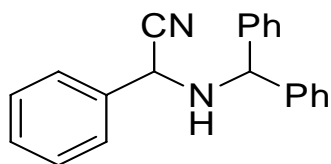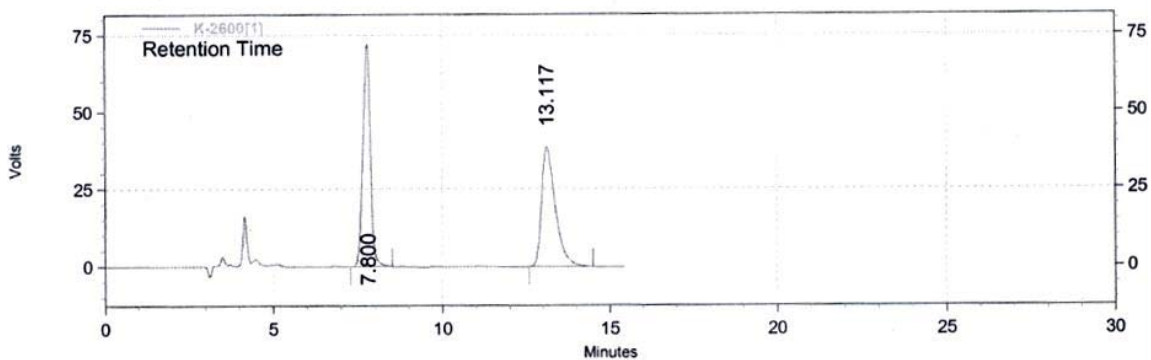

**K-2600[1] Results**

| Retention Time | Area    | Area % | Height | Height % |
|----------------|---------|--------|--------|----------|
| 7.800          | 1090130 | 49.74  | 72242  | 65.19    |
| 13.117         | 1101638 | 50.26  | 38581  | 34.81    |

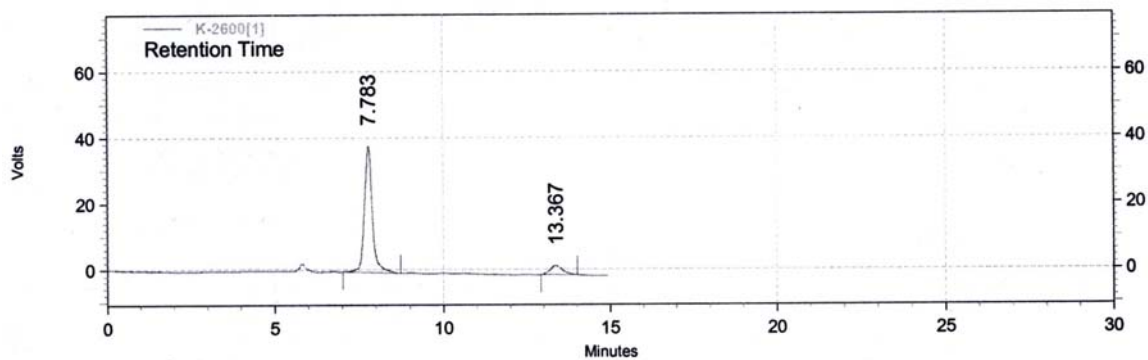

**K-2600[1] Results**

| Retention Time | Area   | Area % | Height | Height % |
|----------------|--------|--------|--------|----------|
| 7.783          | 628061 | 89.86  | 38267  | 93.49    |
| 13.367         | 70877  | 10.14  | 2663   | 6.51     |

Table2, entry 1

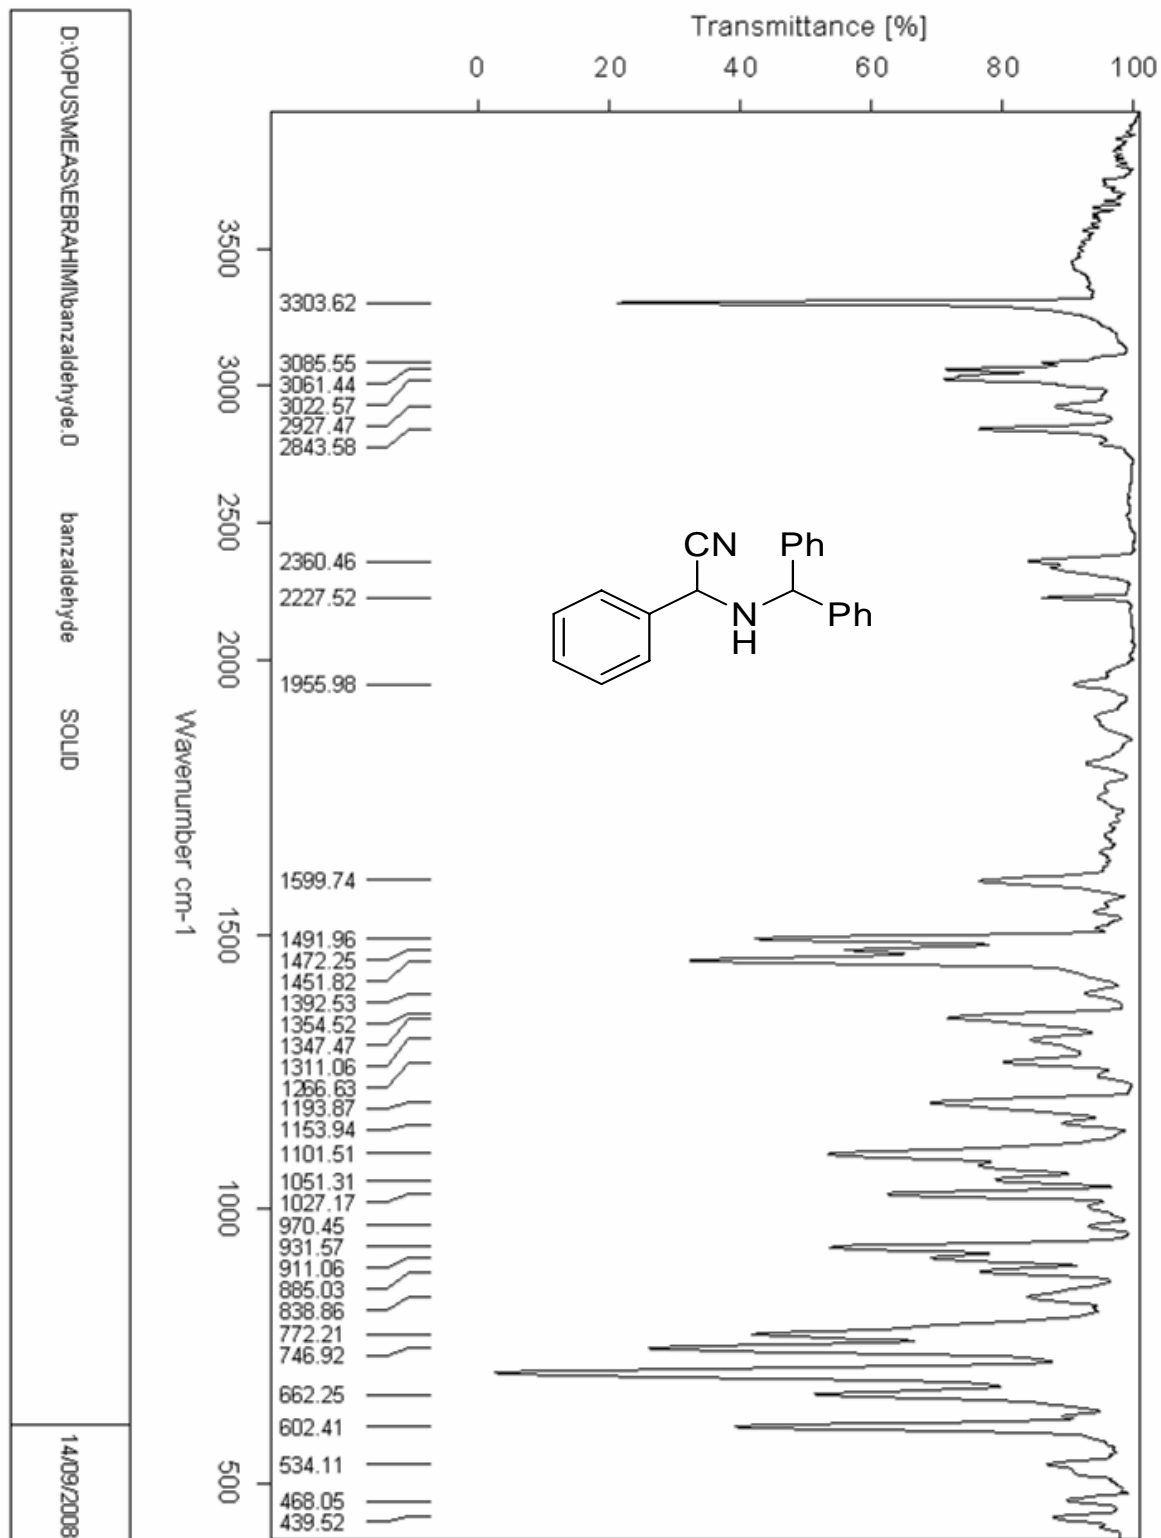

Table2, entry 2

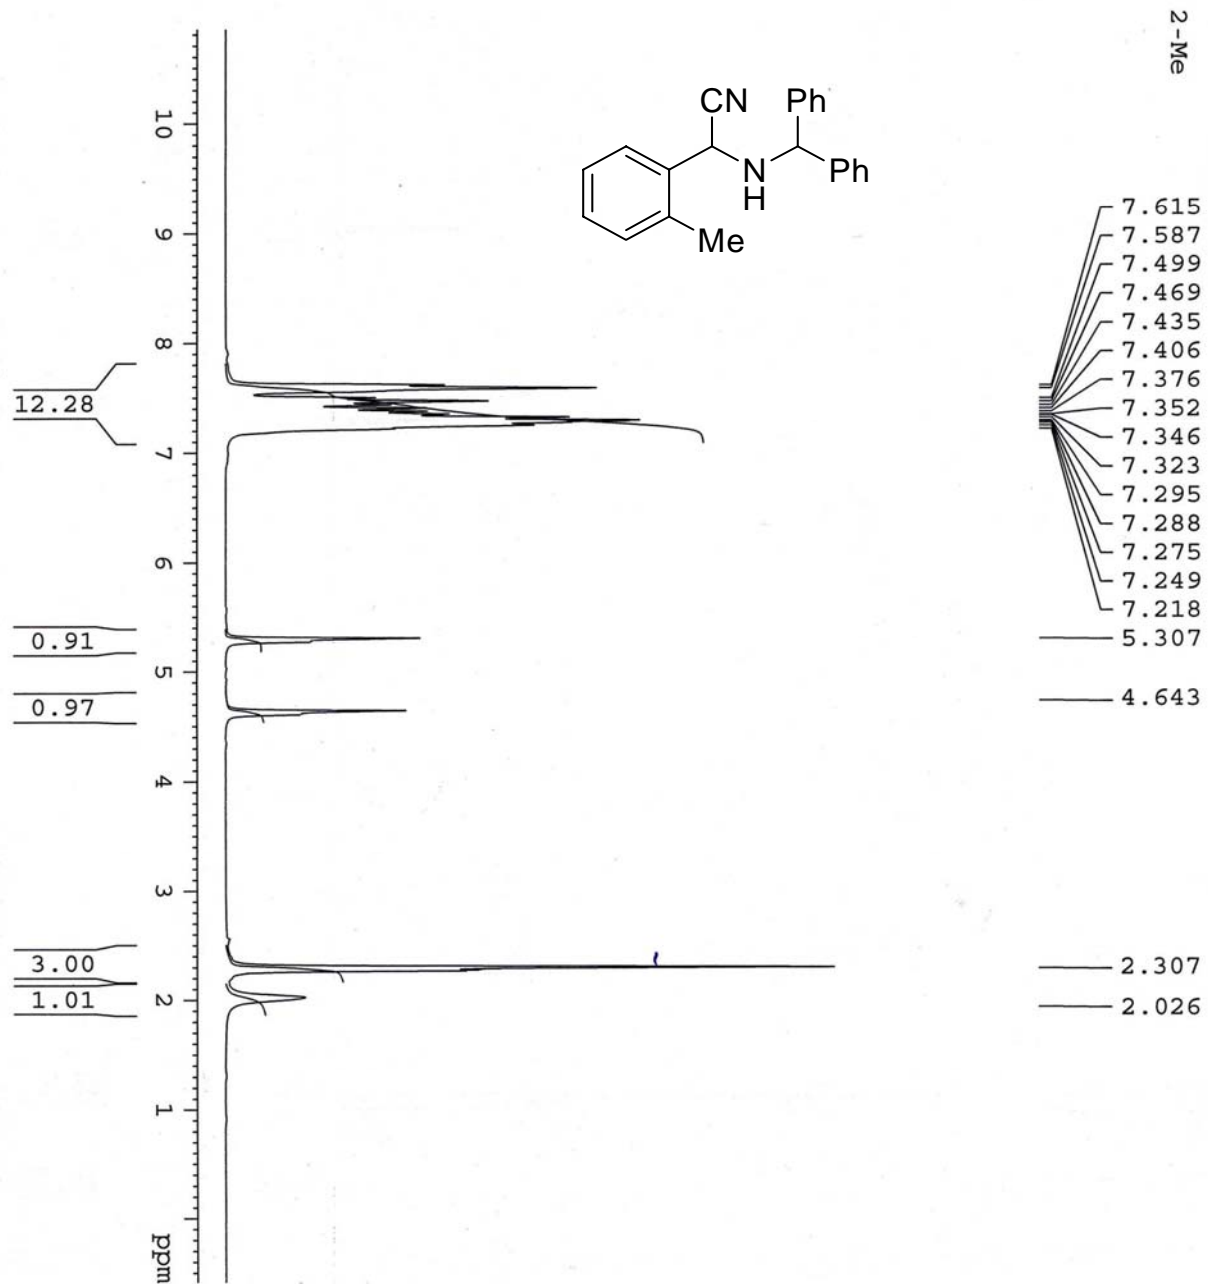

Table2, entry 2

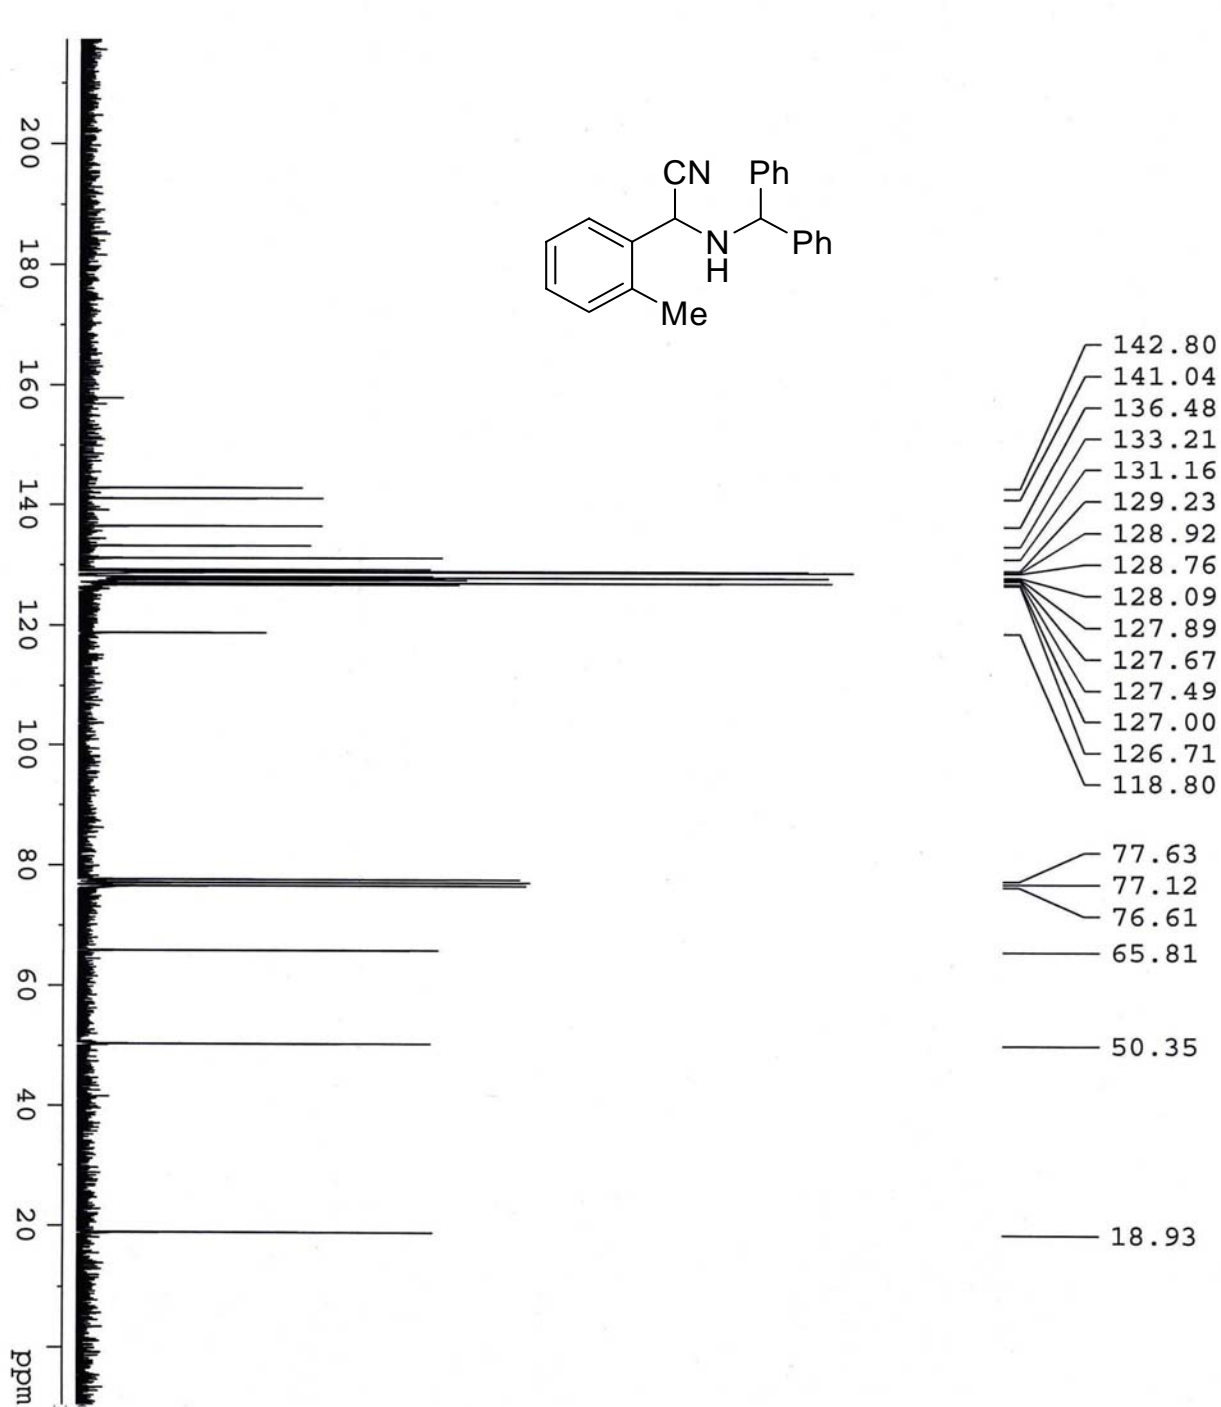

2-Me



### Table2, entry 2

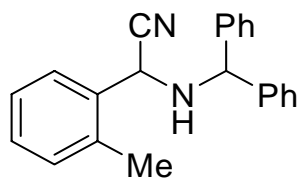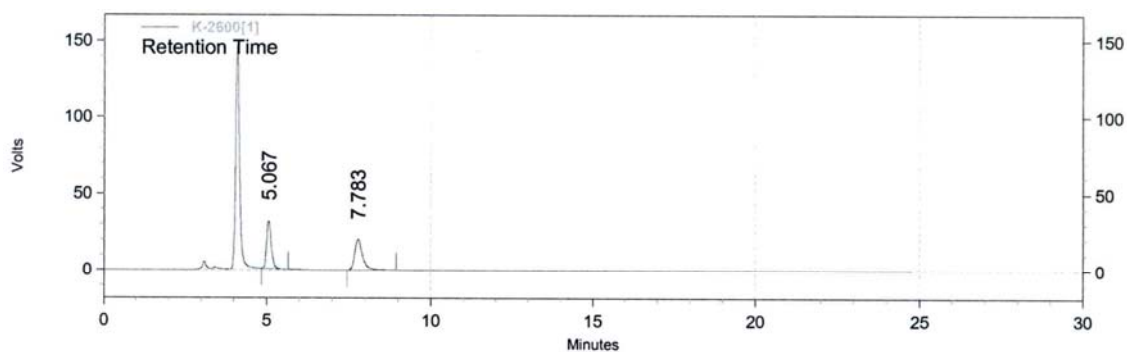

#### K-2600[1] Results

| Retention Time | Area   | Area % | Height | Height % |
|----------------|--------|--------|--------|----------|
| 5.067          | 308844 | 49.20  | 31368  | 61.06    |
| 7.783          | 318885 | 50.80  | 20008  | 38.94    |

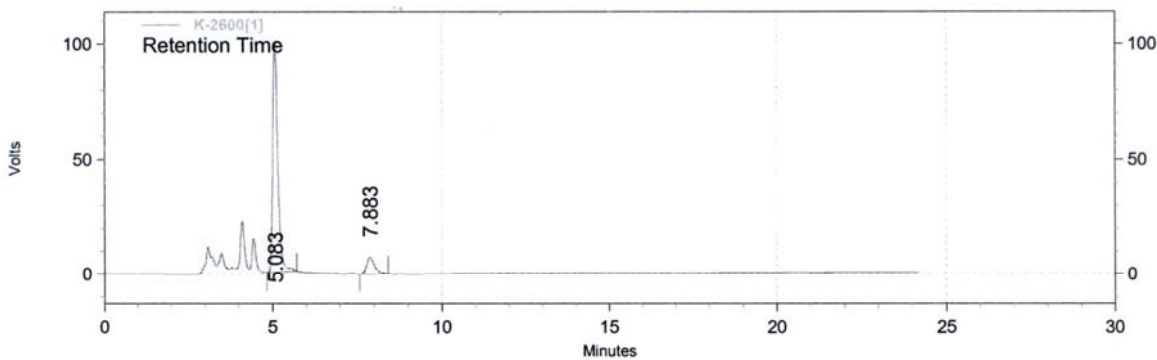

#### K-2600[1] Results

| Retention Time | Area    | Area % | Height | Height % |
|----------------|---------|--------|--------|----------|
| 5.083          | 1022565 | 89.40  | 100503 | 93.18    |
| 7.883          | 121205  | 10.60  | 7357   | 6.82     |

Table2, entry 2

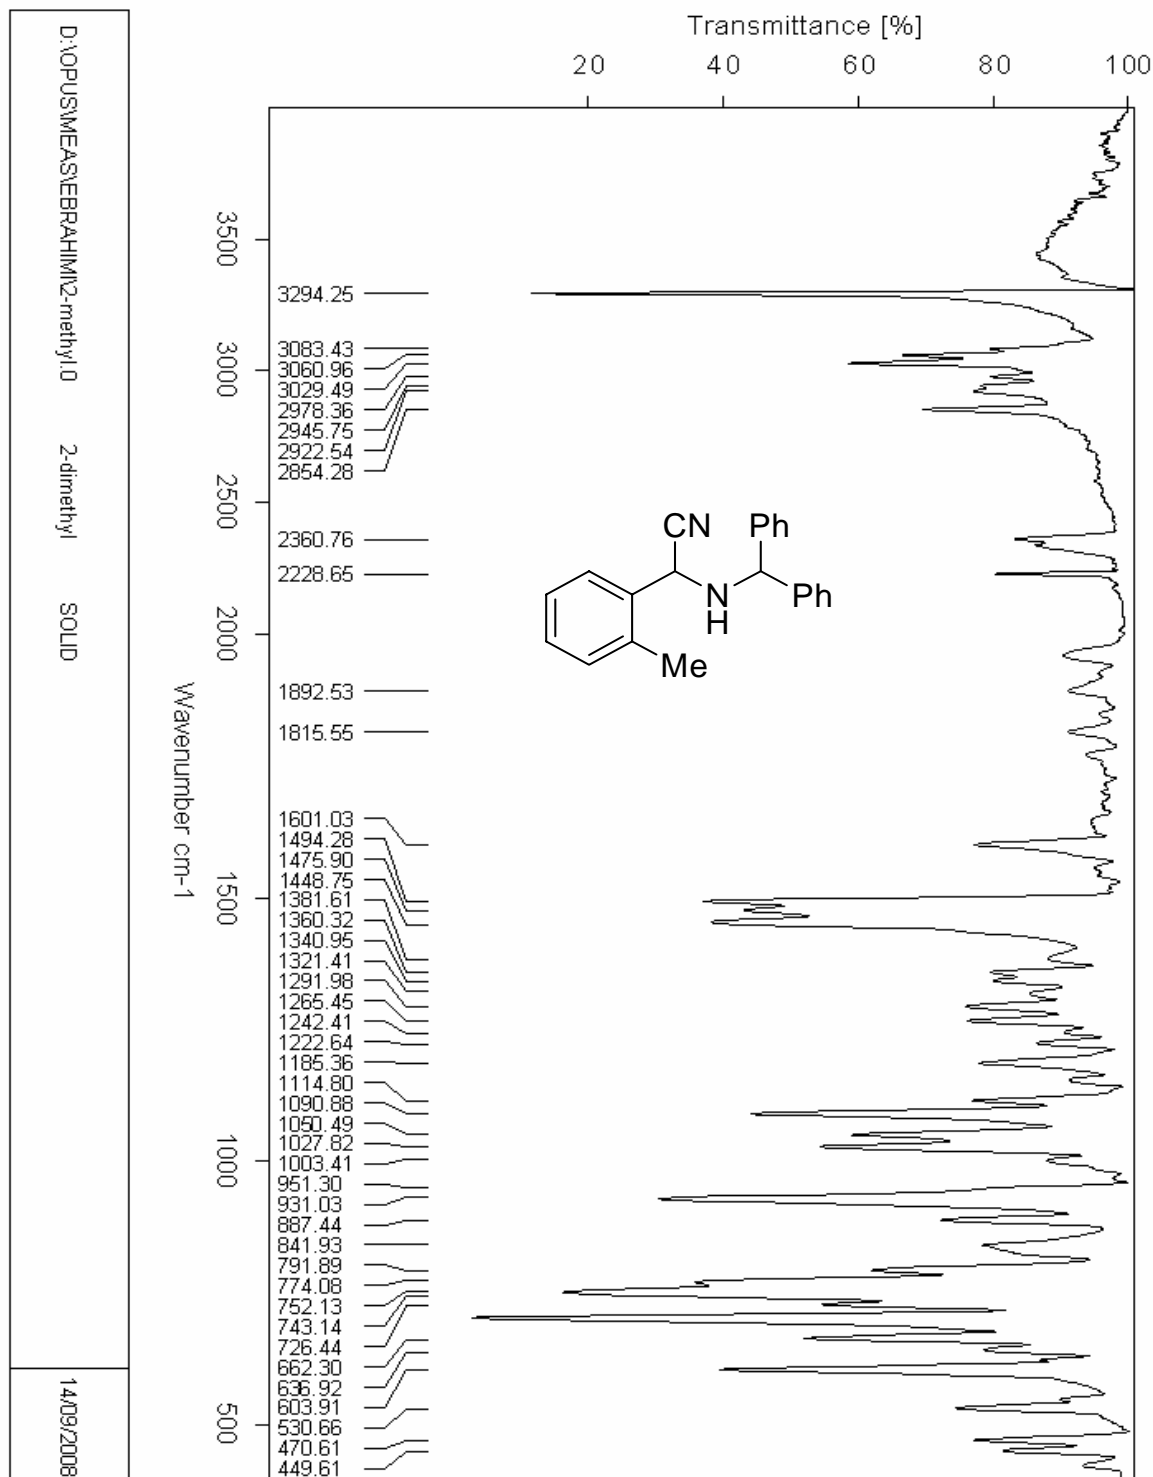

Table2, entry 3

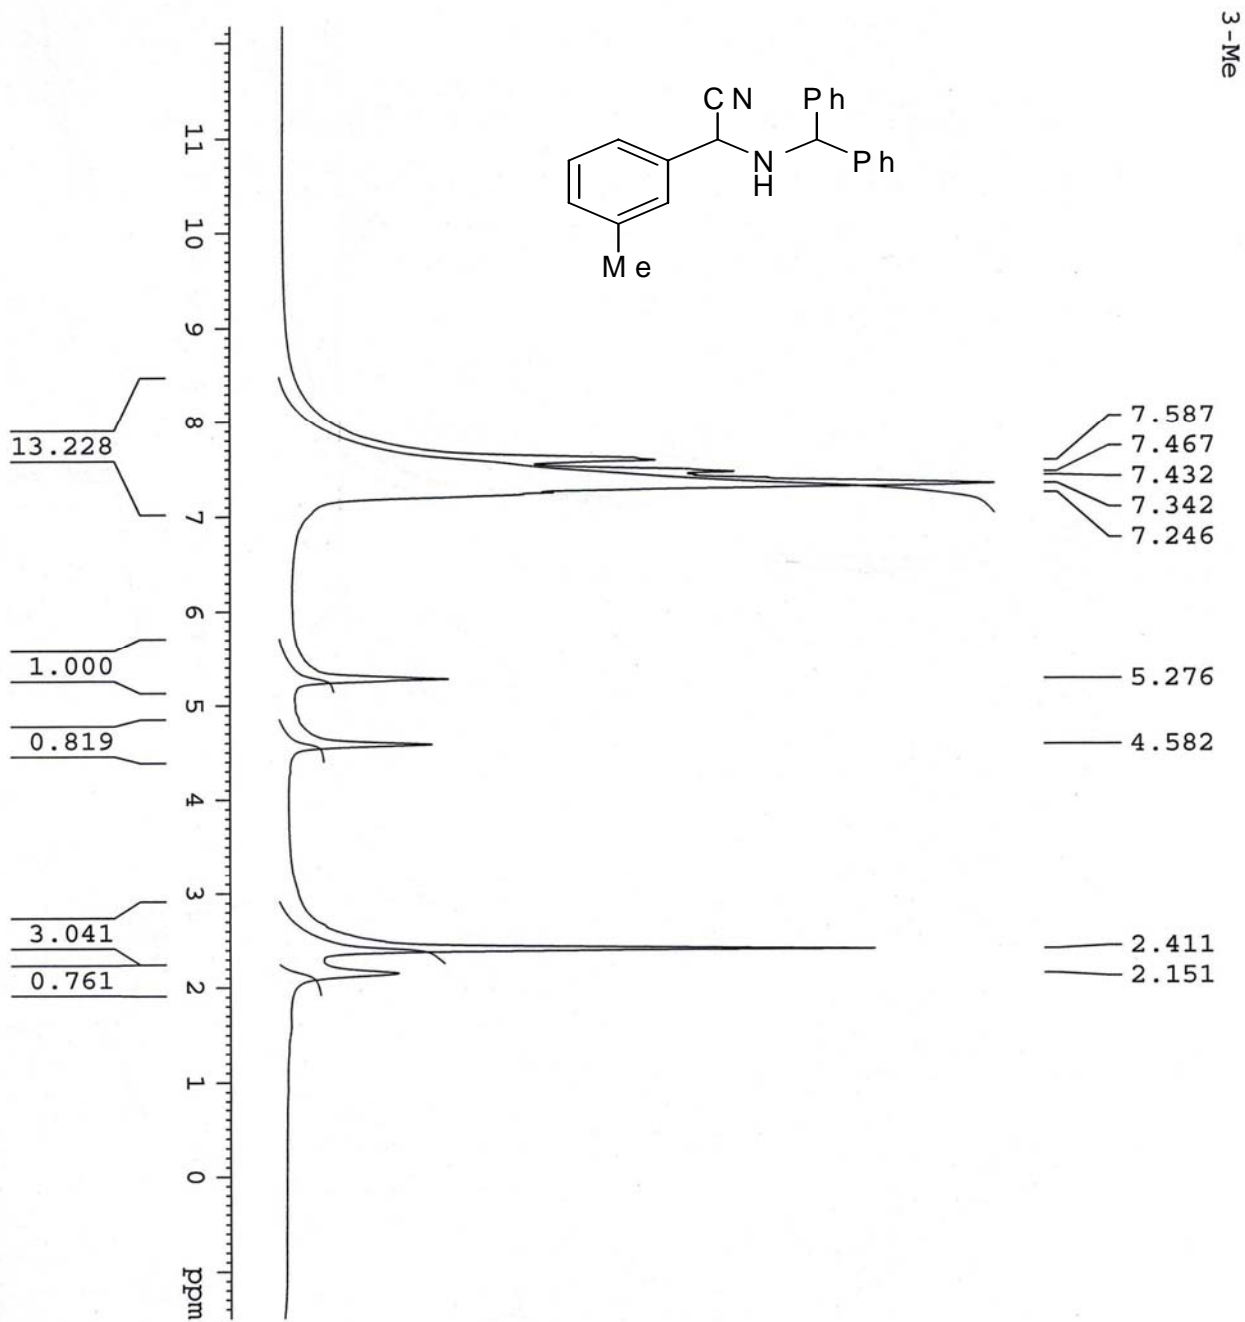

Table2, entry 3

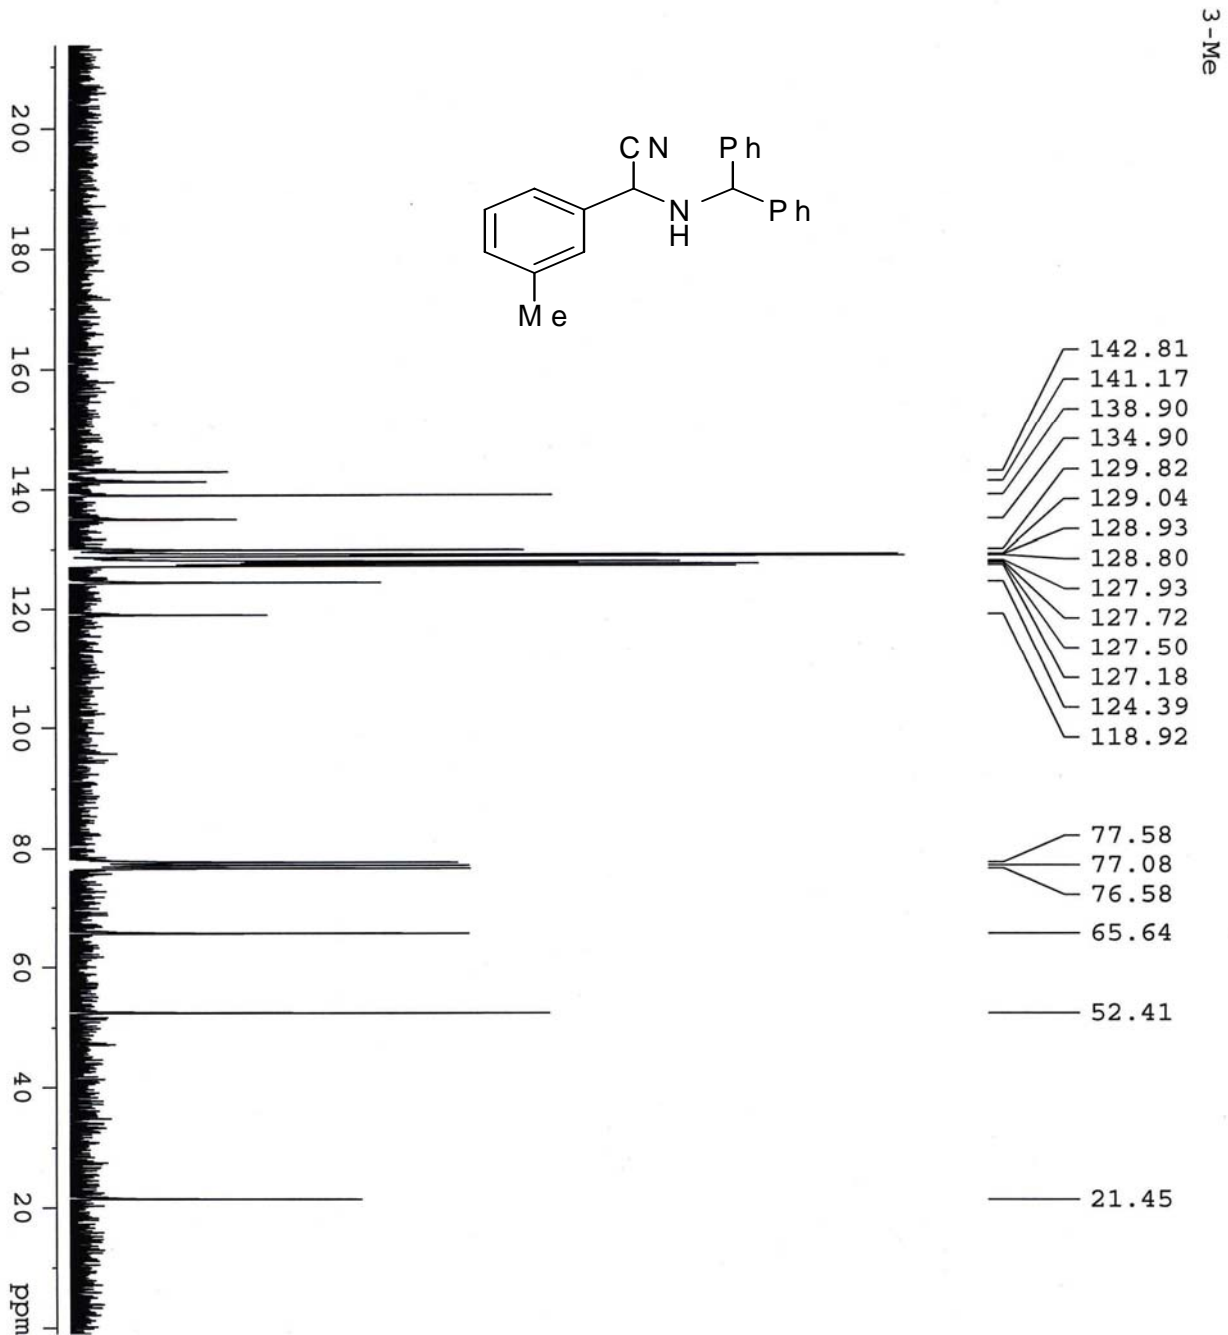

Table2, entry 3

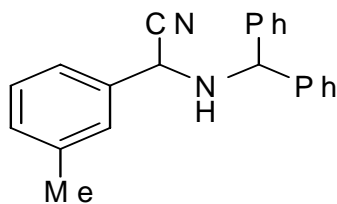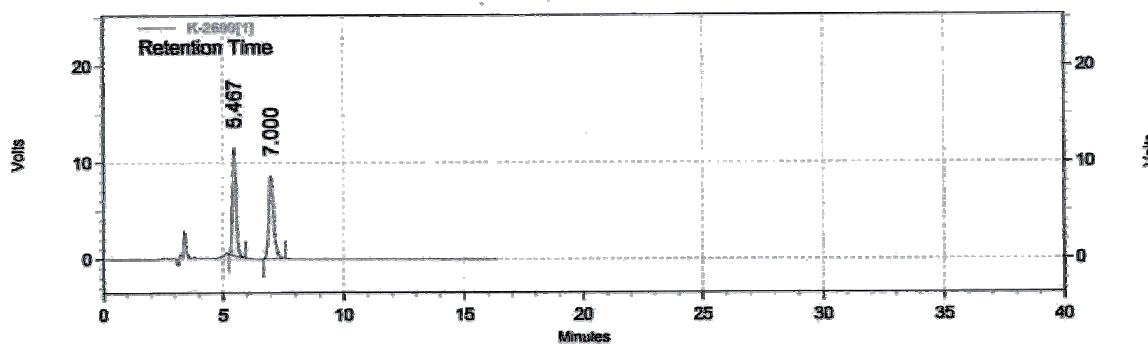

**K-2600[1] Results**

| Retention Time | Area   | Area % | Height | Height % |
|----------------|--------|--------|--------|----------|
| 5.467          | 118905 | 49.61  | 11162  | 56.39    |
| 7.000          | 120772 | 50.39  | 8631   | 43.61    |

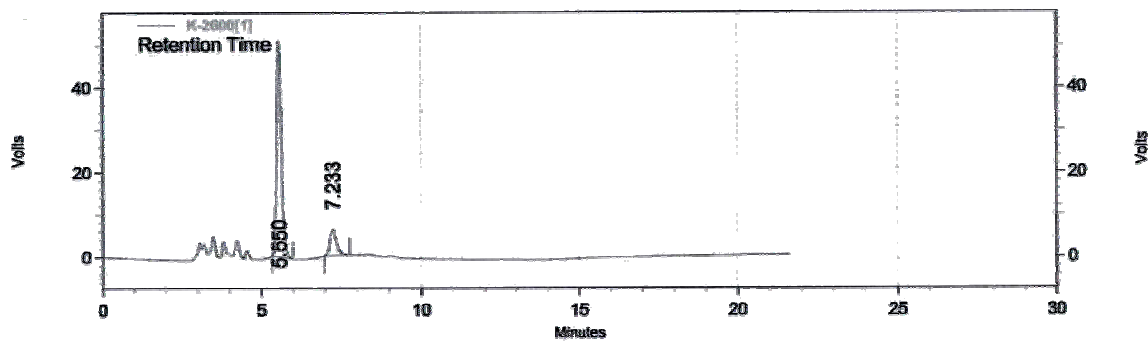

**K-2600[1] Results**

| Retention Time | Area   | Area % | Height | Height % |
|----------------|--------|--------|--------|----------|
| 5.550          | 533046 | 85.71  | 51134  | 89.27    |
| 7.233          | 88904  | 14.29  | 6145   | 10.73    |

**Table2, entry 3**

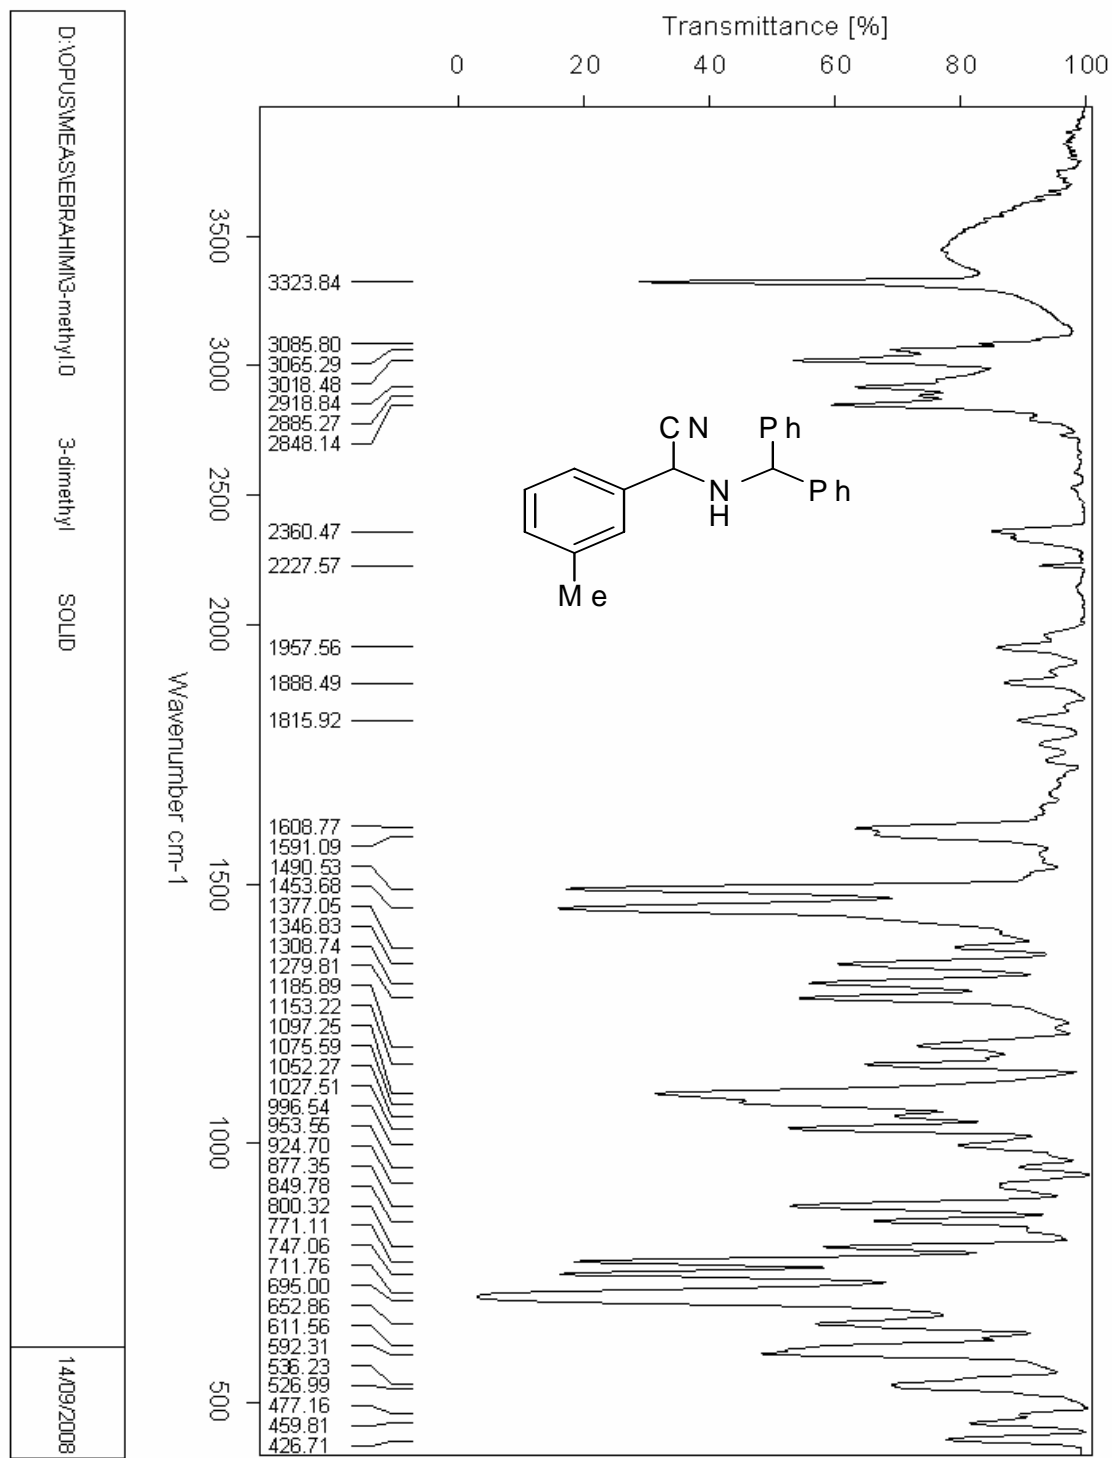

**Table2, entry 4**

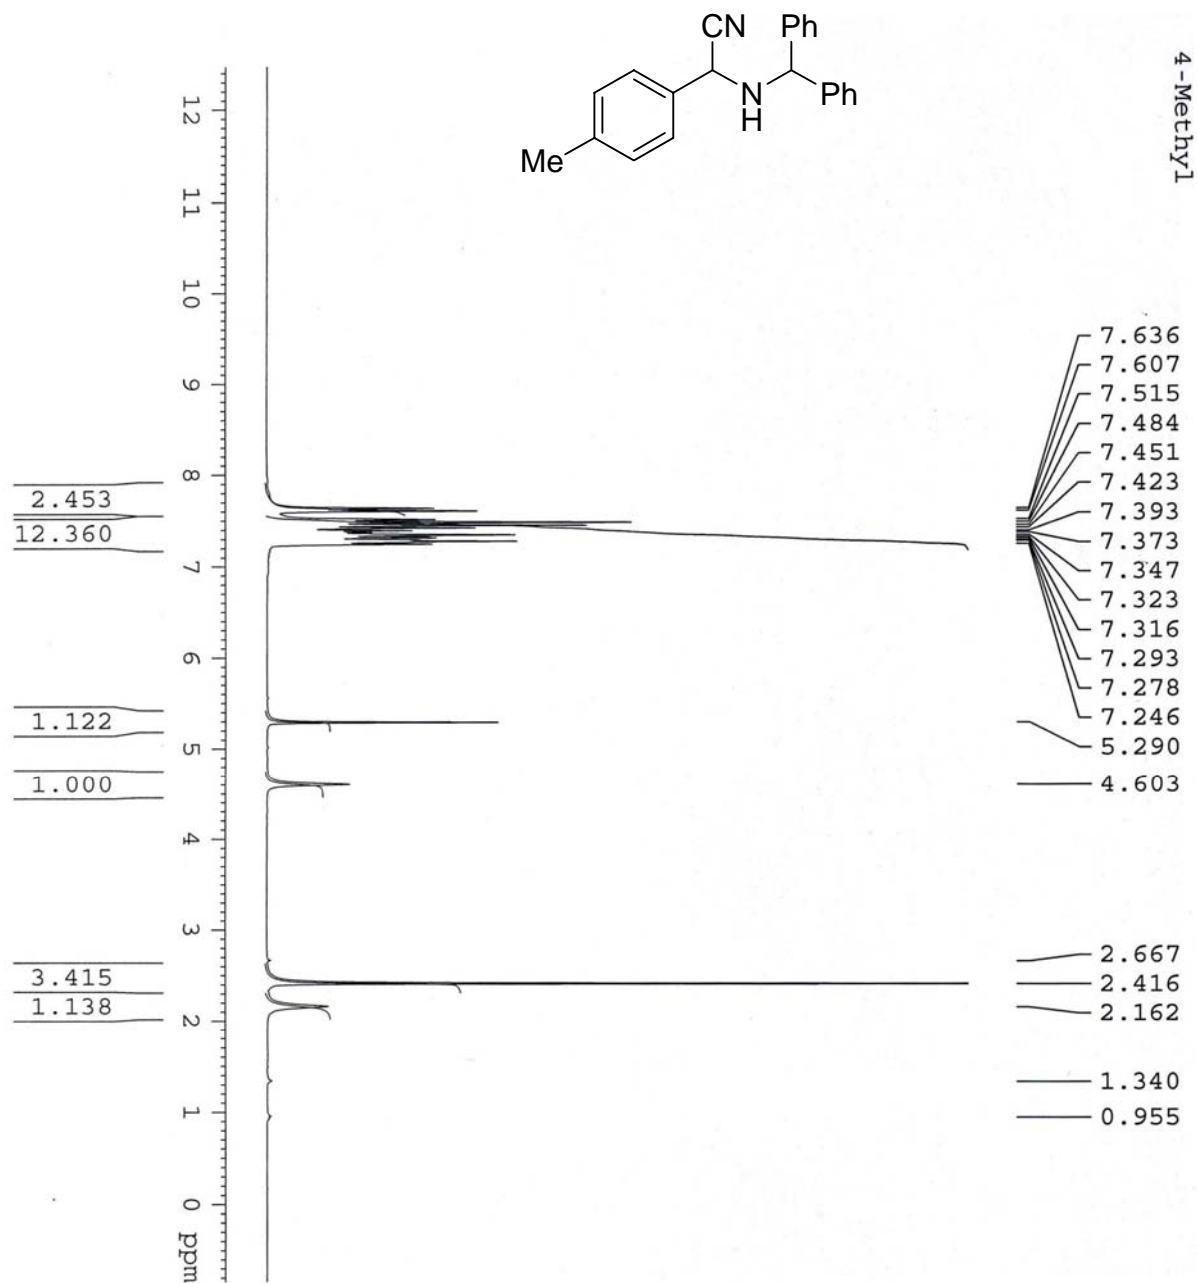

Table2, entry 4

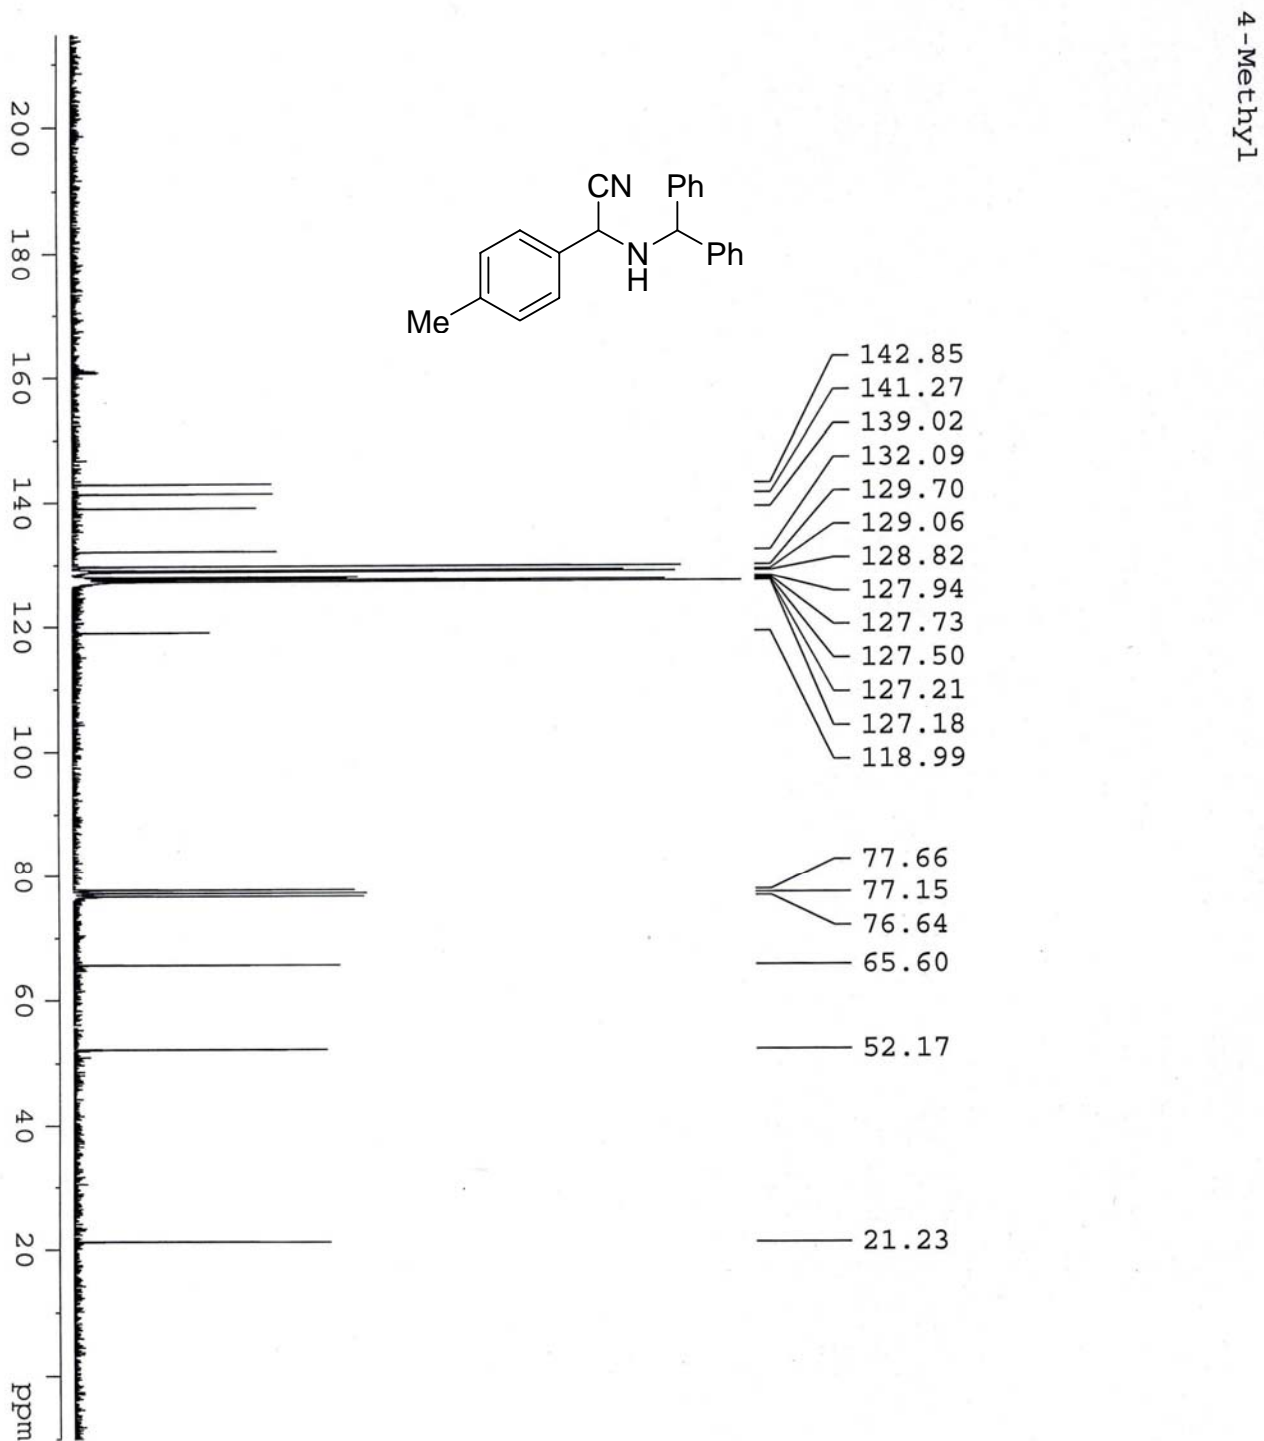



**Table2, entry 4**

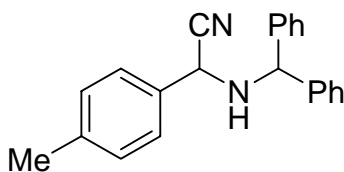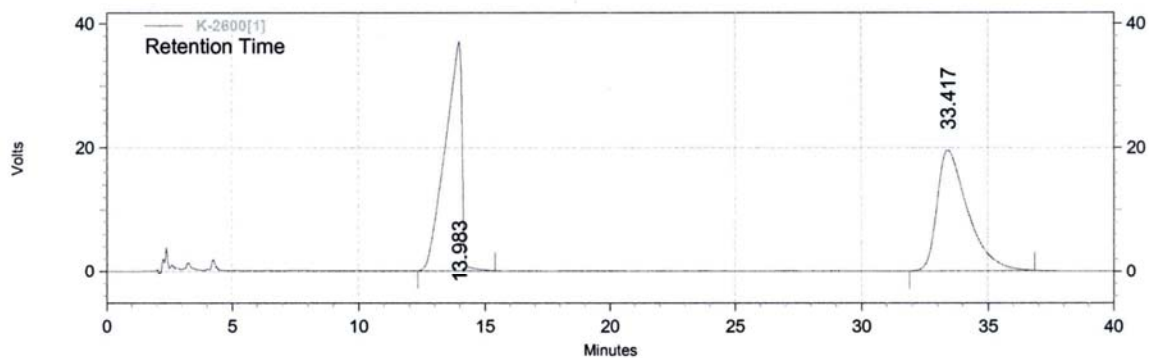

**K-2600[1] Results**

| Retention Time | Area    | Area % | Height | Height % |
|----------------|---------|--------|--------|----------|
| 13.9 3         | 1648095 | 50.18  | 36935  | 65.51    |
| 33.417         | 1636272 | 49.82  | 19443  | 34.49    |

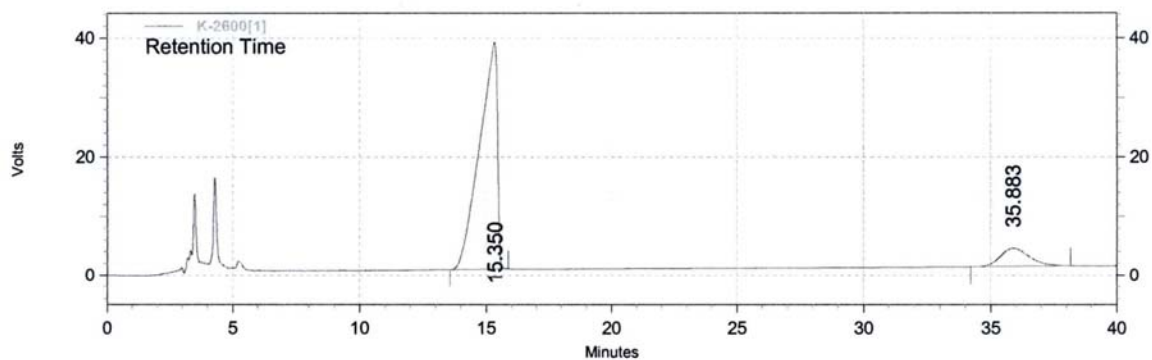

**K-2600[1] Results**

| Retention Time | Area    | Area % | Height | Height % |
|----------------|---------|--------|--------|----------|
| 15.350         | 1877845 | 88.42  | 38214  | 92.53    |
| 35.883         | 246008  | 11.58  | 3083   | 7.47     |

Table2, entry 4

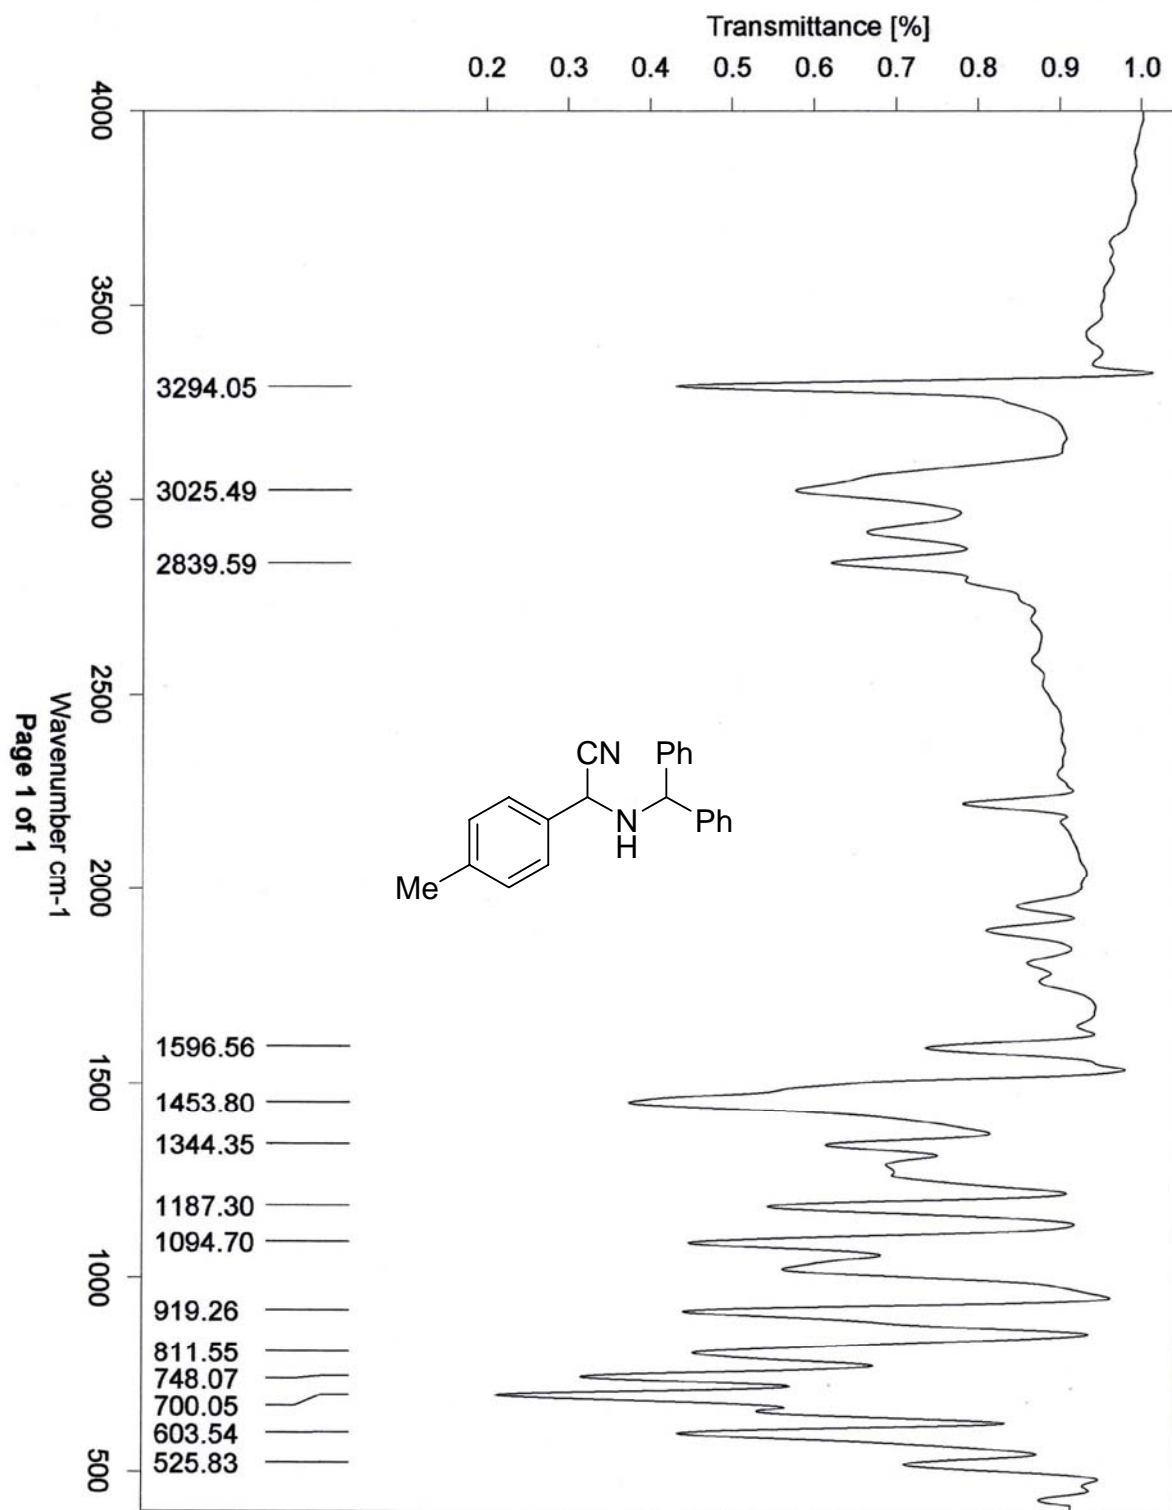

**Table2, entry 5**

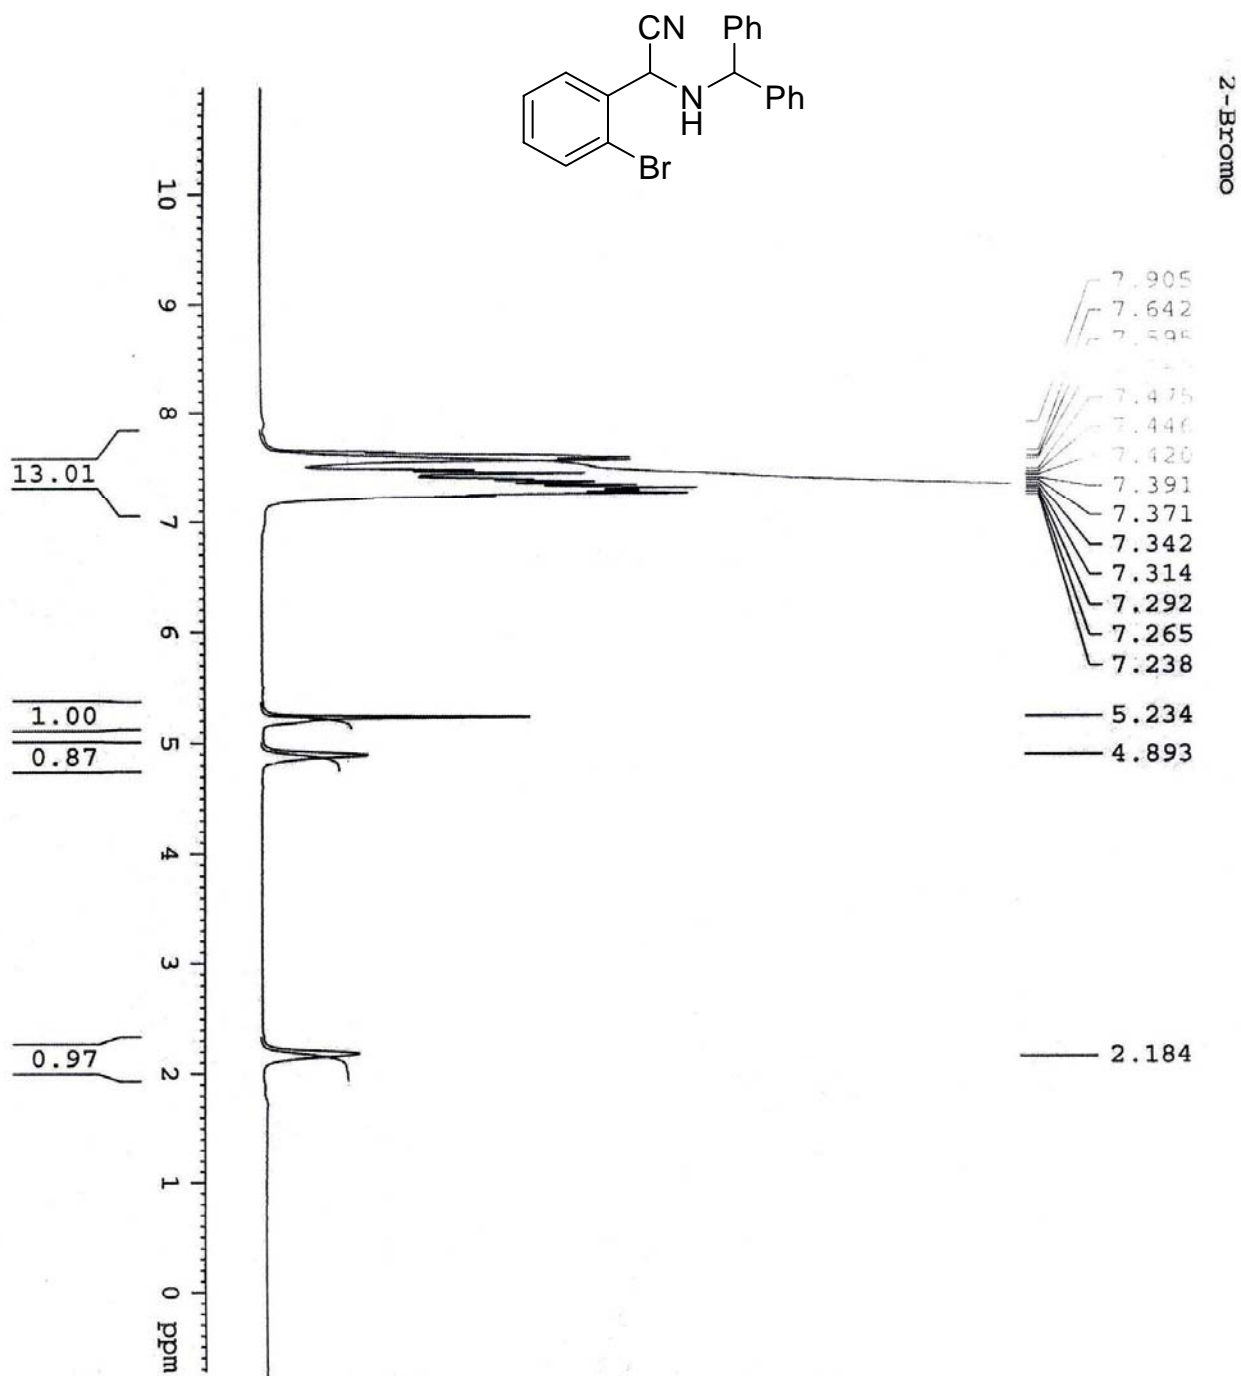

**Table2, entry 5**

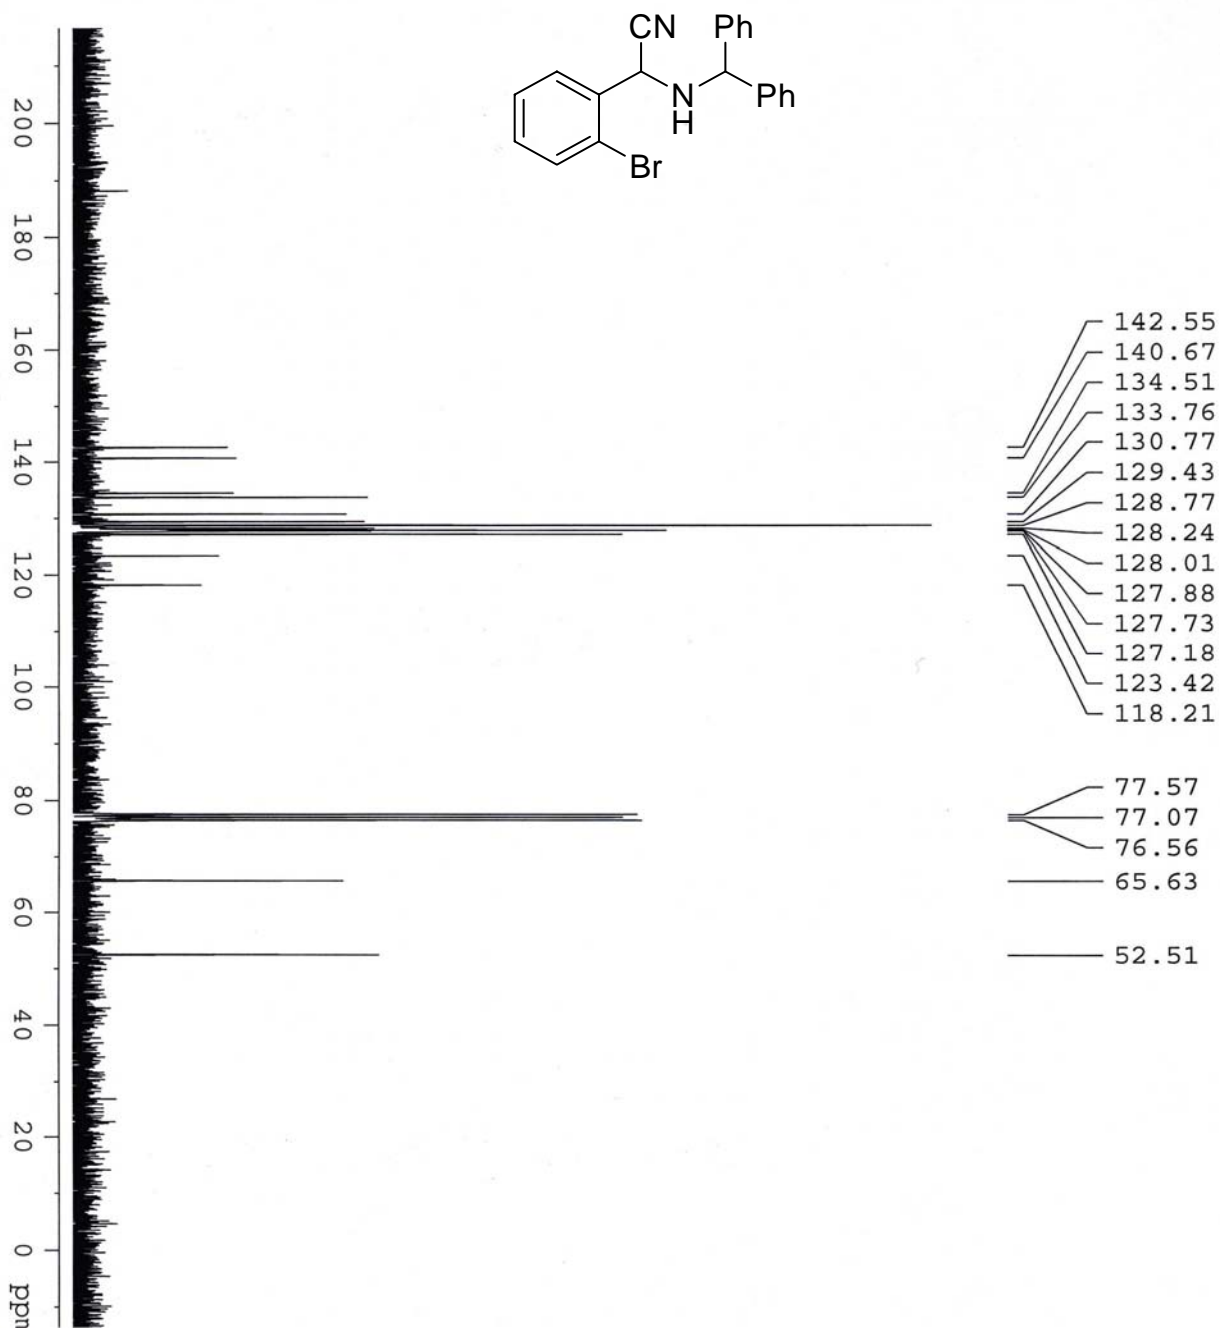

2-Br

**Table2, entry 5**

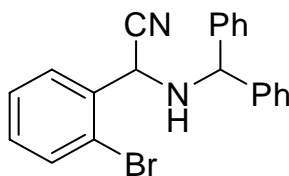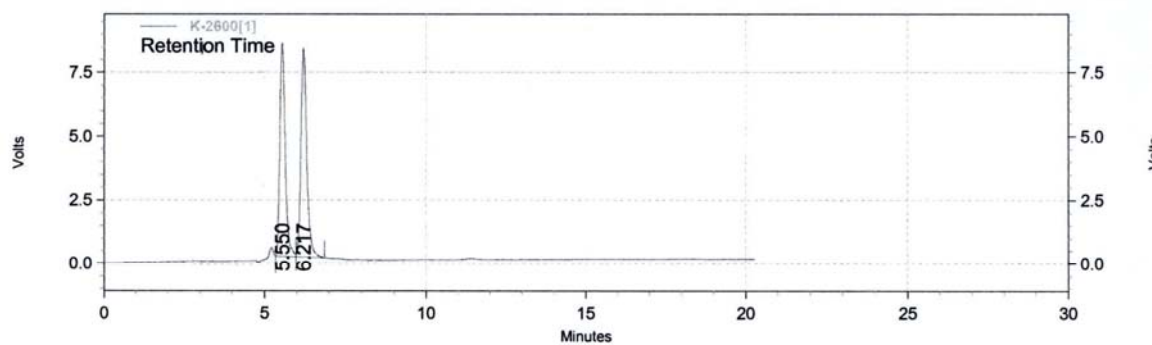

**K-2600[1] Results**

| Retention Time | Area   | Area % | Height | Height % |
|----------------|--------|--------|--------|----------|
| 5.550          | 100900 | 49.46  | 8372   | 50.52    |
| 6.217          | 103104 | 50.54  | 8199   | 49.48    |

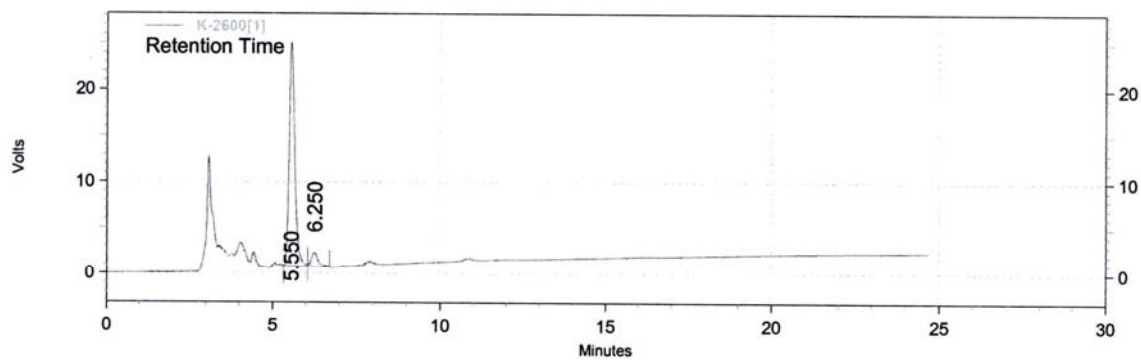

**K-2600[1] Results**

| Retention Time | Area   | Area % | Height | Height % |
|----------------|--------|--------|--------|----------|
| 5.550          | 286250 | 92.80  | 24295  | 93.95    |
| 6.250          | 22213  | 7.20   | 1565   | 6.05     |

Table2, entry 5

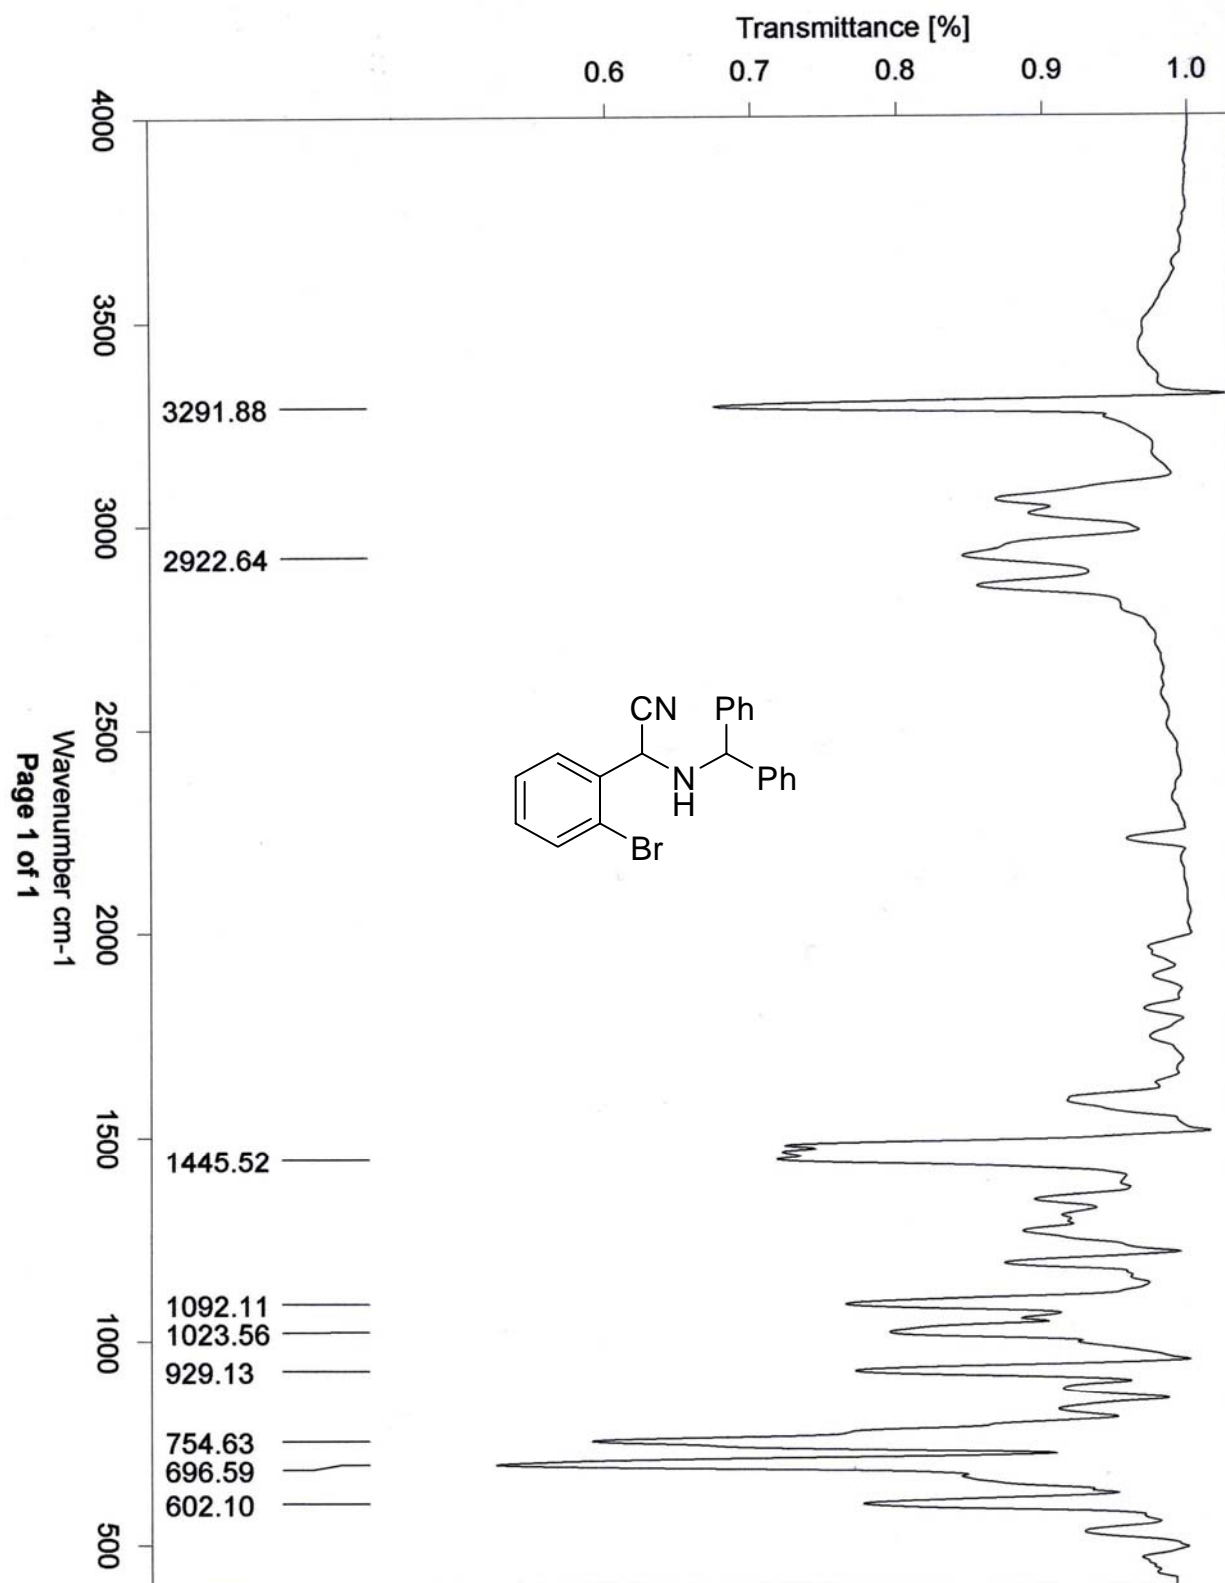

Table2, entry 6

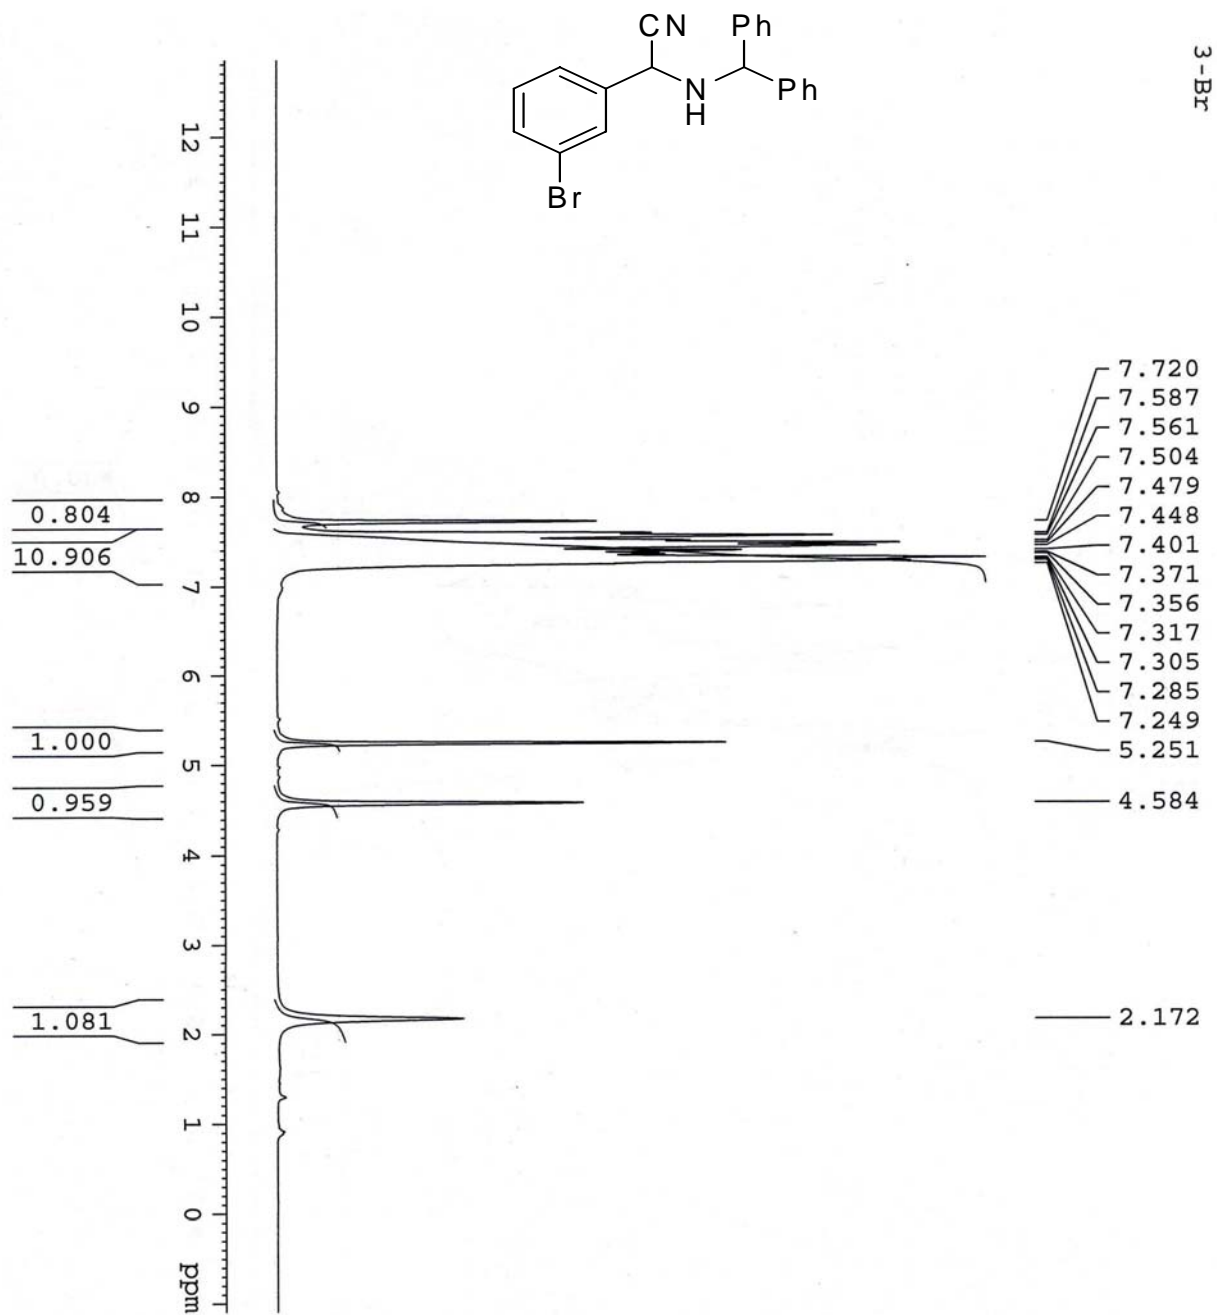

Table2, entry 6

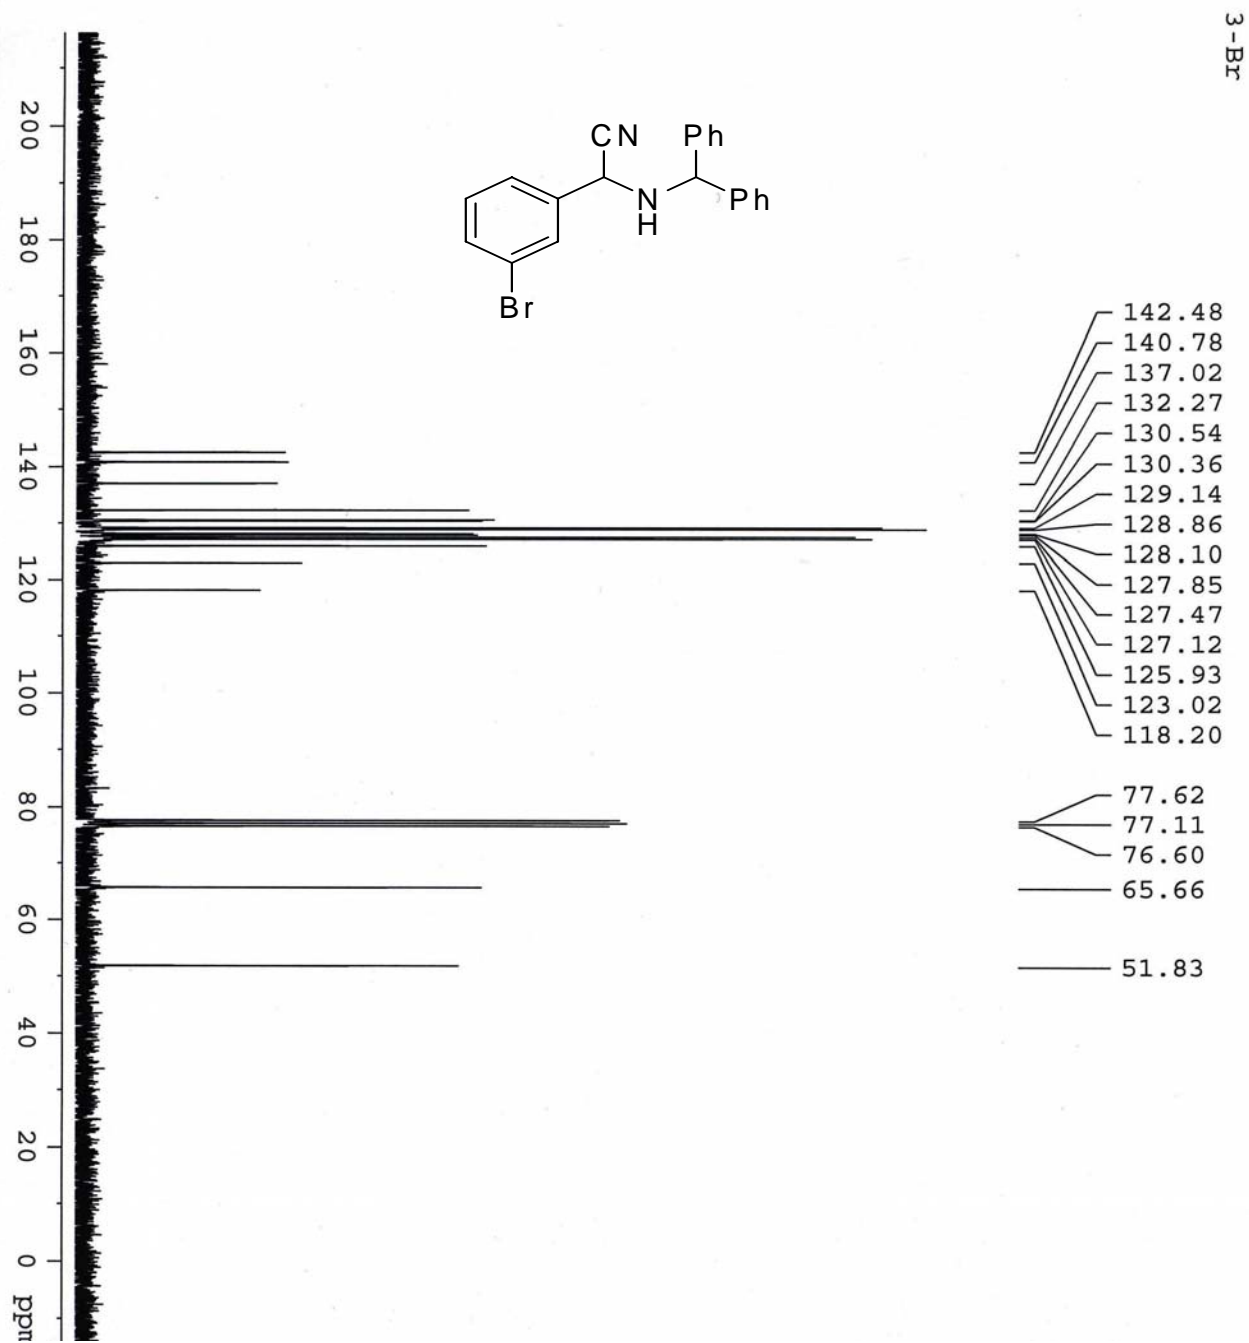



**Table2, entry 6**

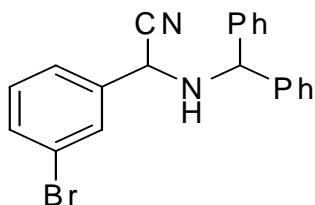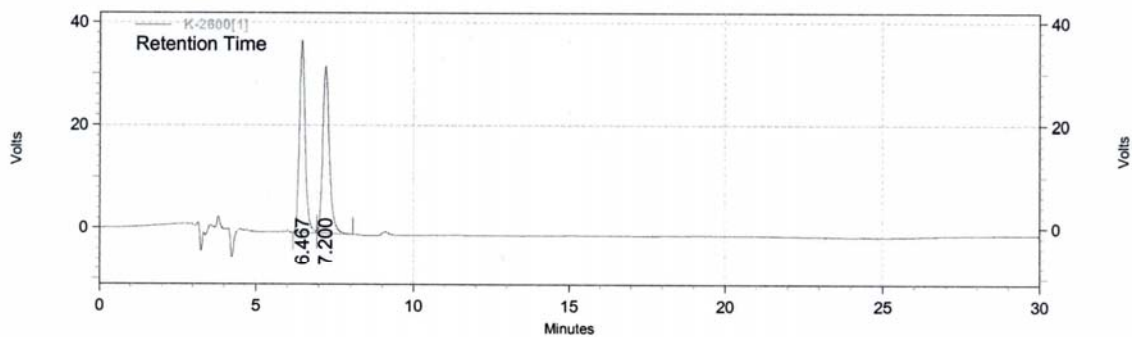

**K-2600[1] Results**

| Retention Time | Area   | Area % | Height | Height % |
|----------------|--------|--------|--------|----------|
| 6.467          | 478831 | 49.76  | 37539  | 53.58    |
| 7.200          | 483388 | 50.24  | 32518  | 46.42    |

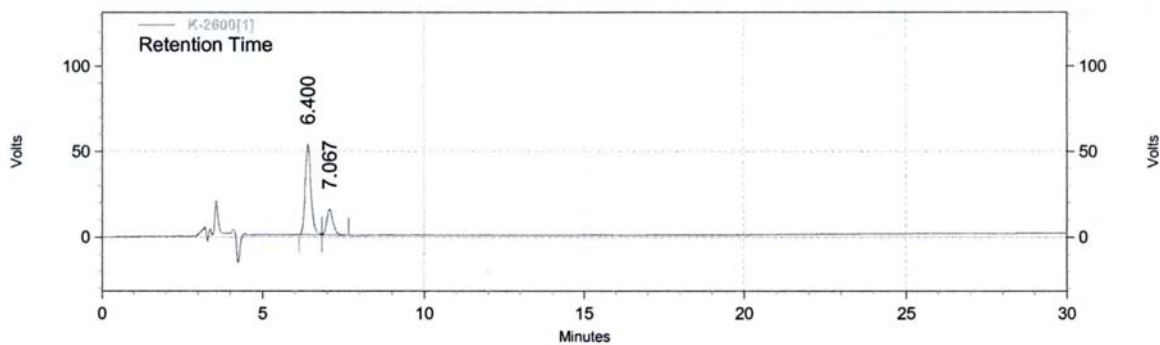

**K-2600[1] Results**

| Retention Time | Area   | Area % | Height | Height % |
|----------------|--------|--------|--------|----------|
| 6.400          | 652022 | 76.26  | 52641  | 77.76    |
| 7.067          | 202924 | 23.74  | 15053  | 22.24    |

**Table2, entry 6**

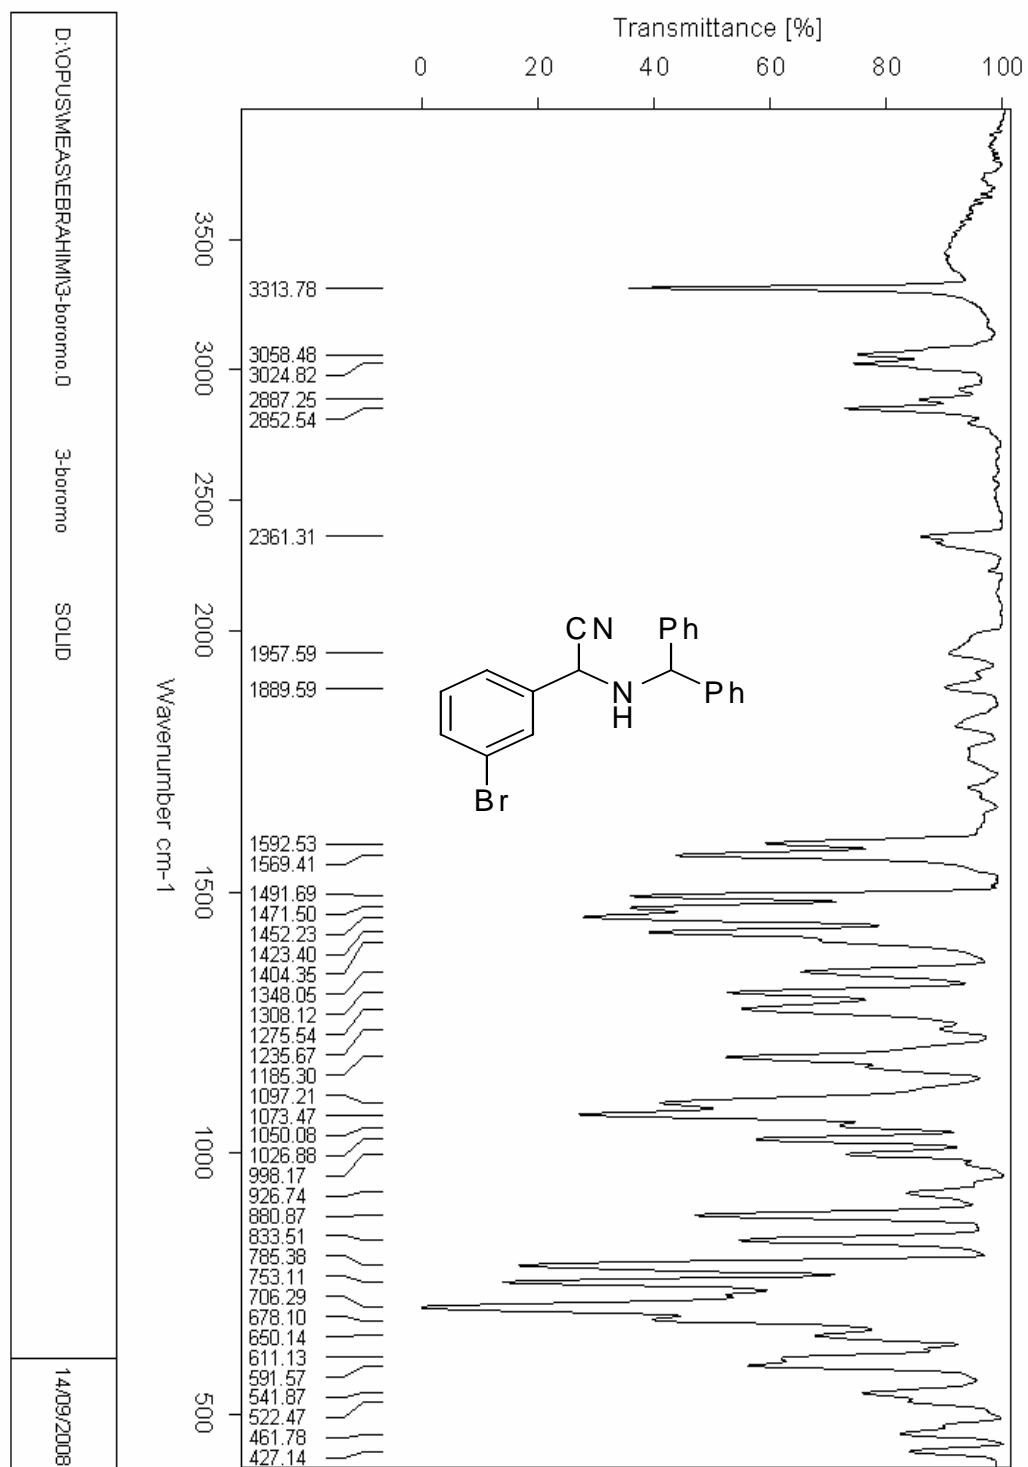

Table2, entry 7

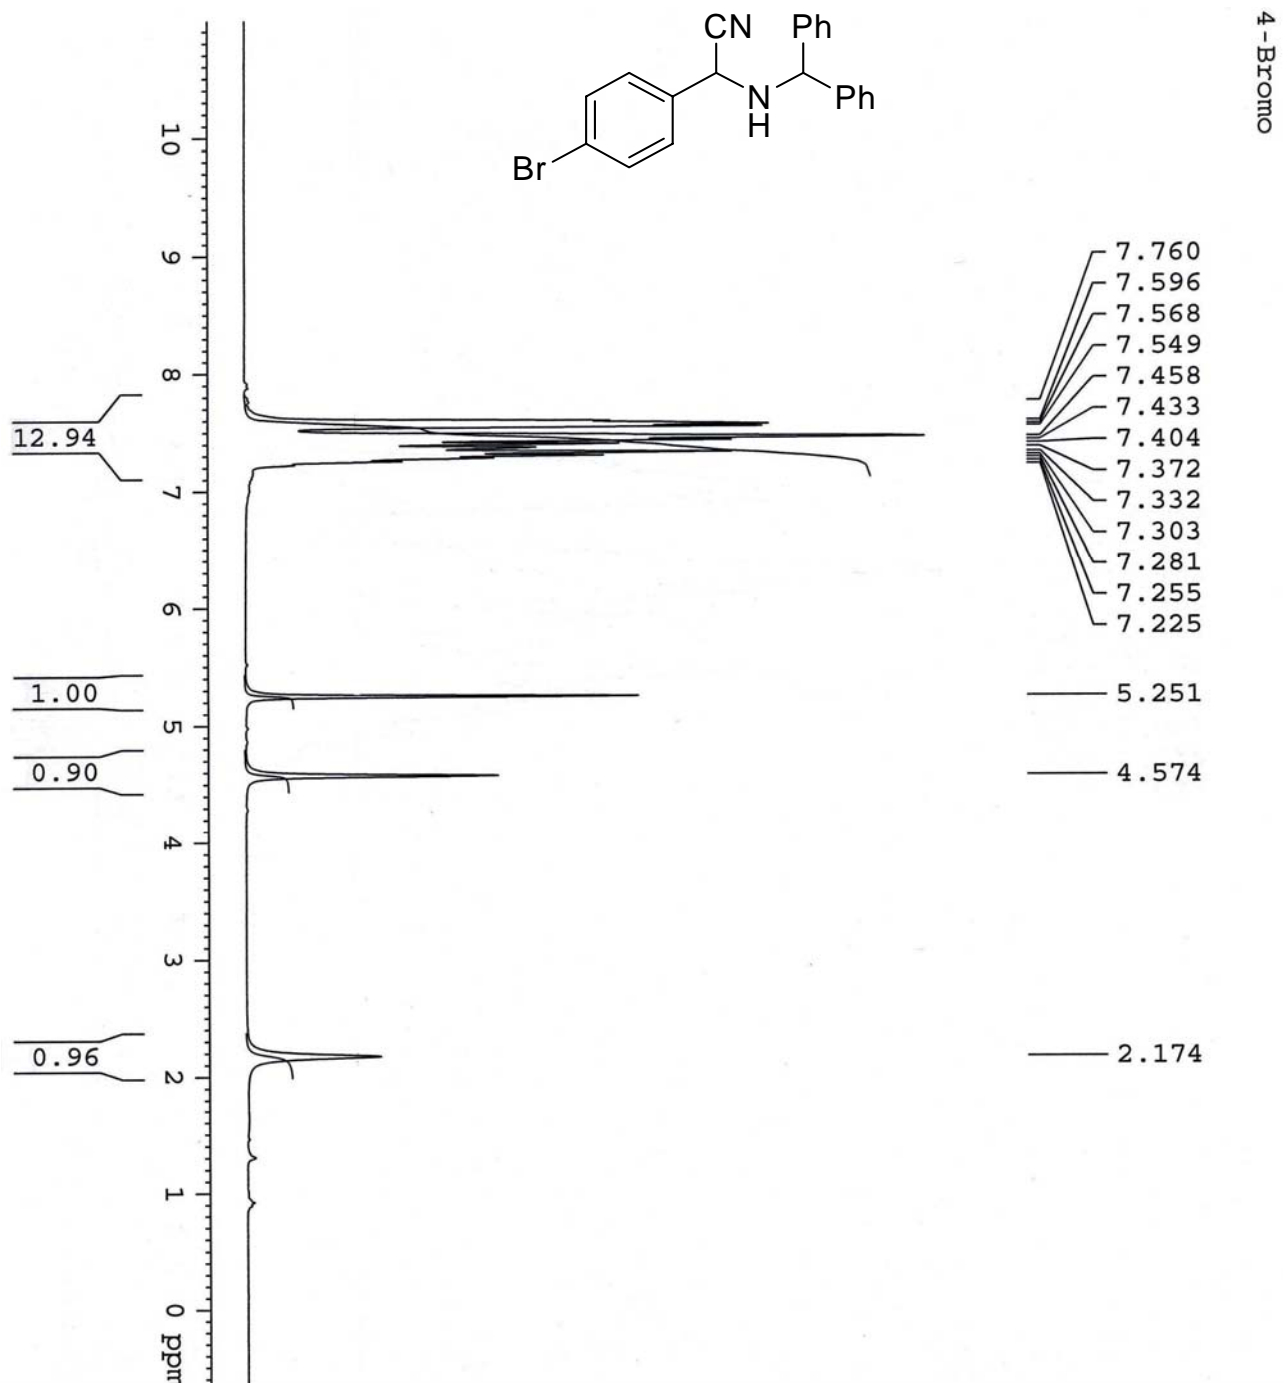

Table2, entry 7

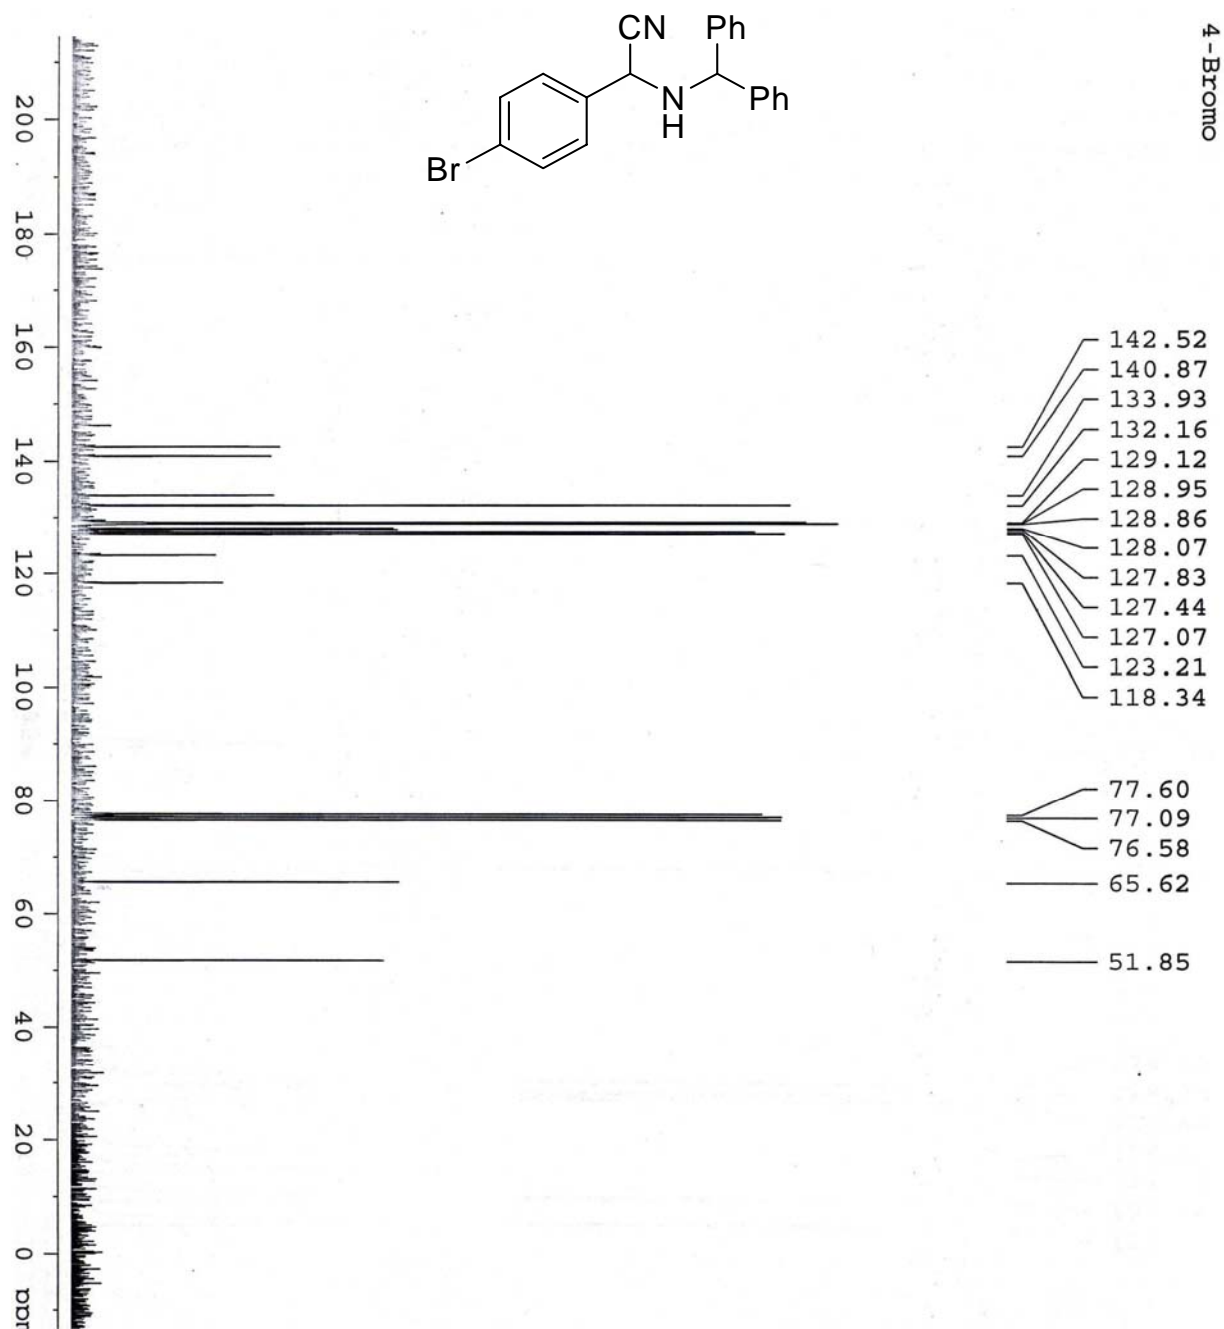



**Table 2, entry 7**

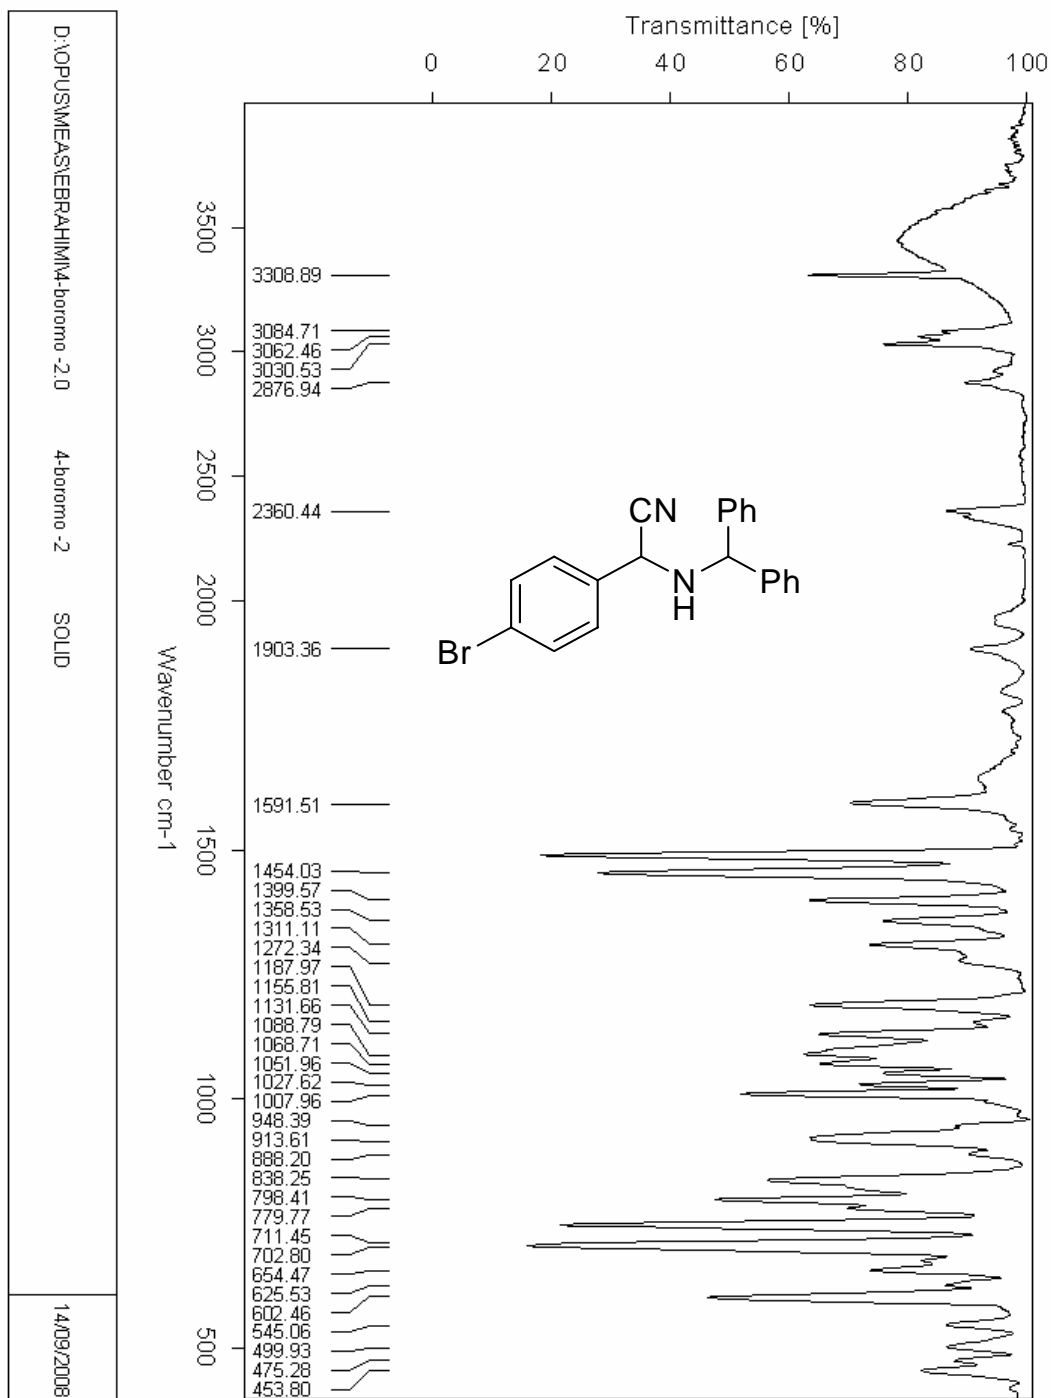

Table 2, entry 8

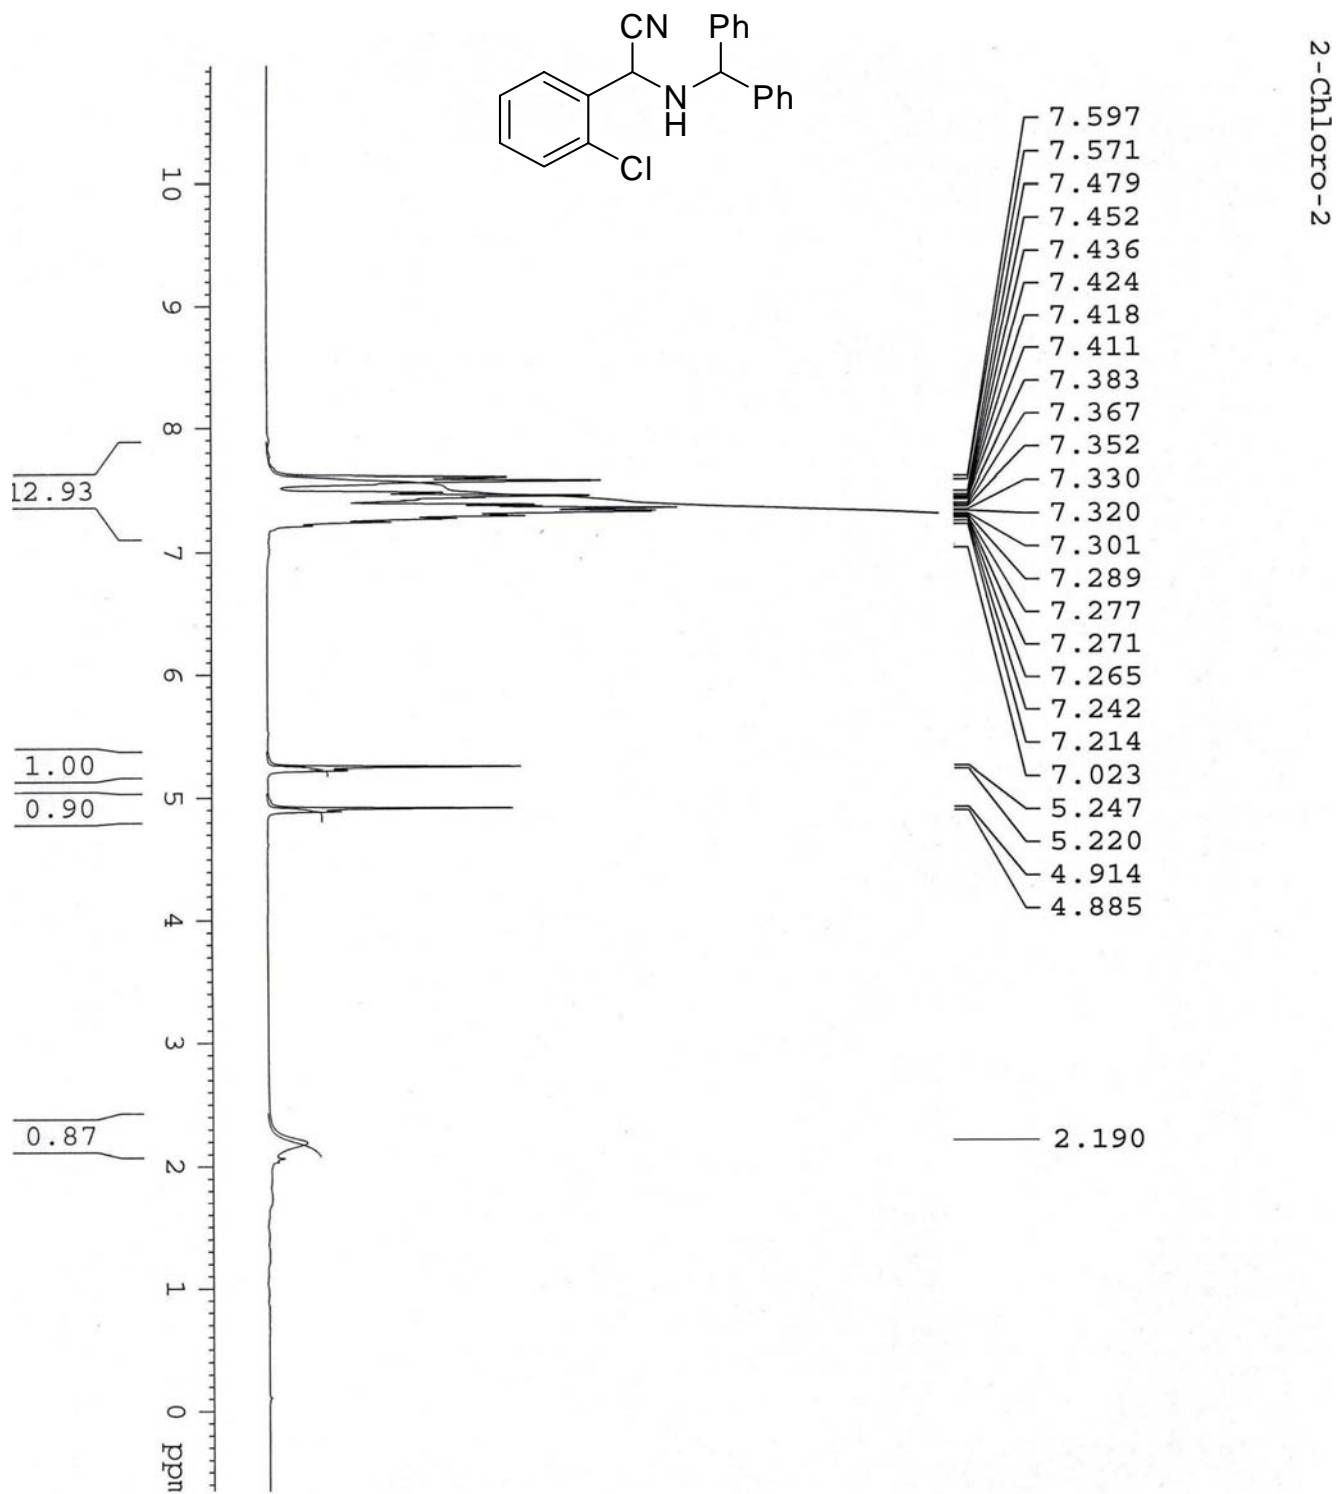

Table 2, entry 8

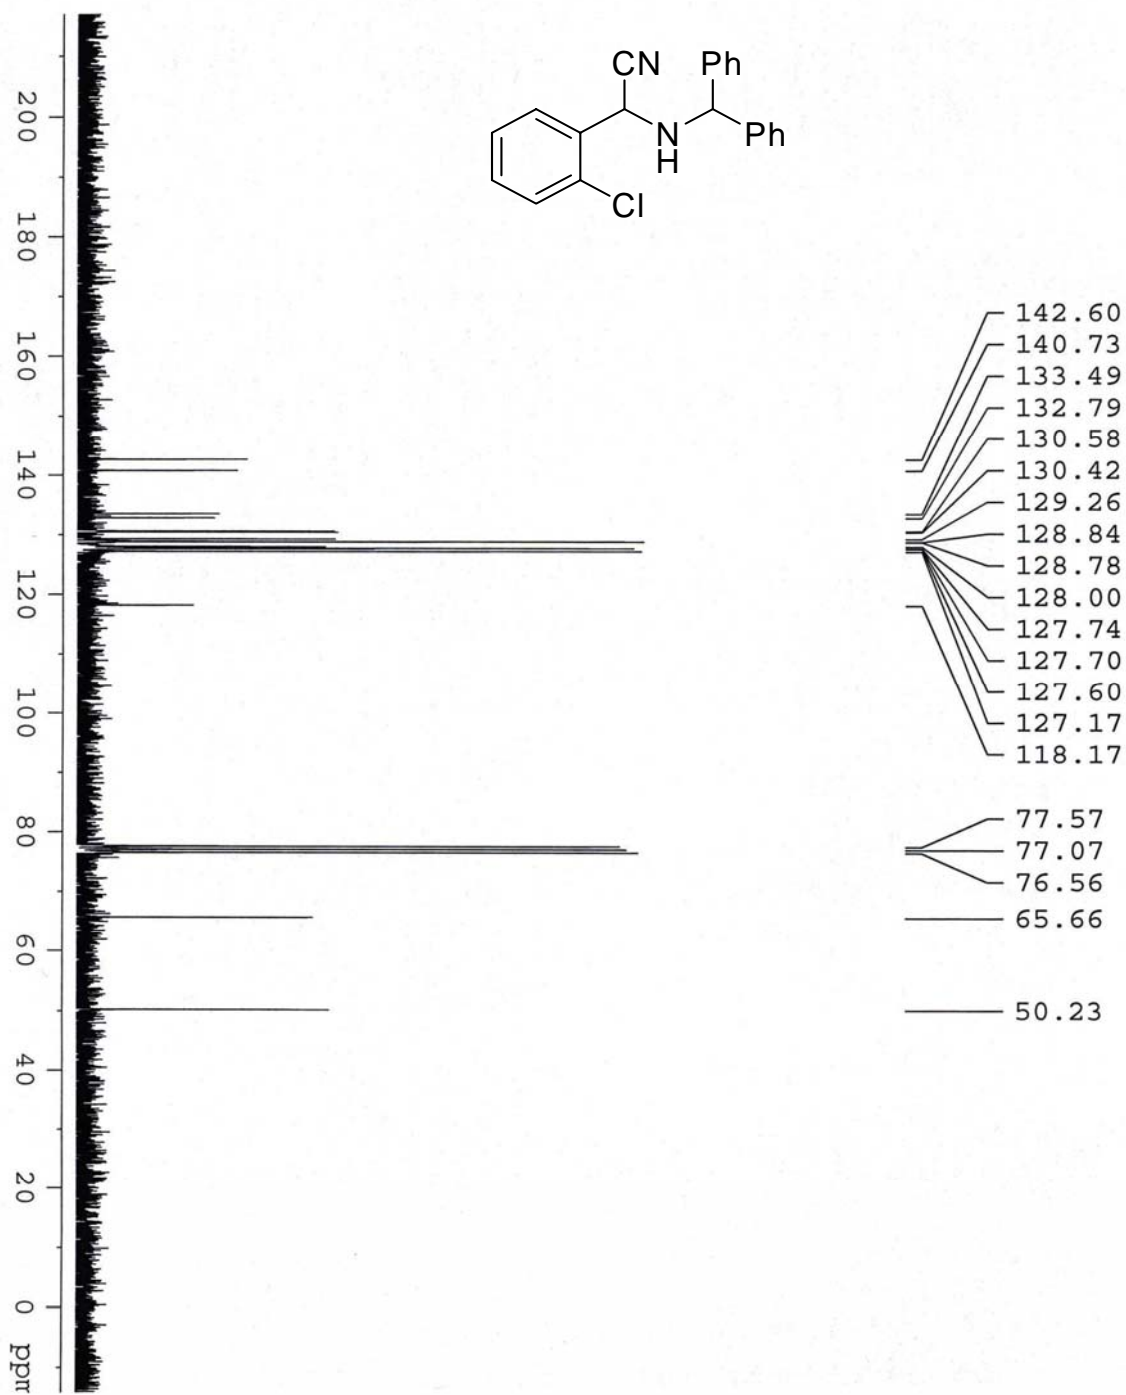

2-Chloro



Table 2, entry 8

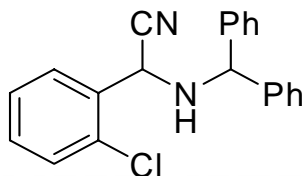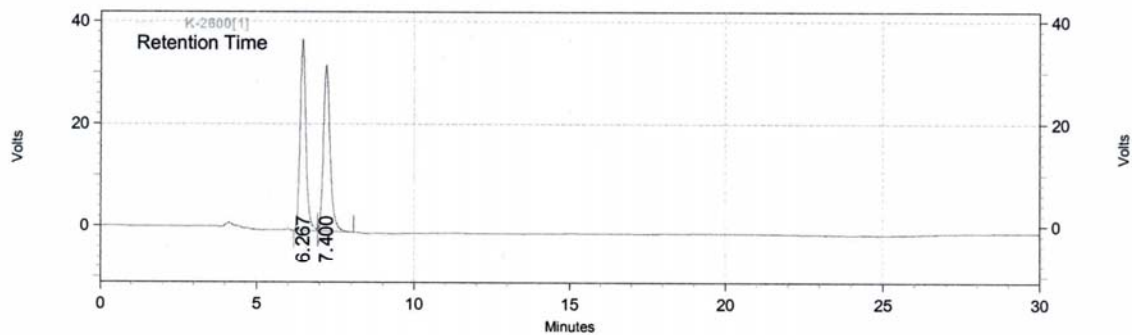

**K-2600[1] Results**

| Retention Time | Area    | Area % | Height | Height % |
|----------------|---------|--------|--------|----------|
| 6.267          | 4657745 | 49.71  | 289406 | 58.34    |
| 7.400          | 4604059 | 50.29  | 206662 | 41.66    |

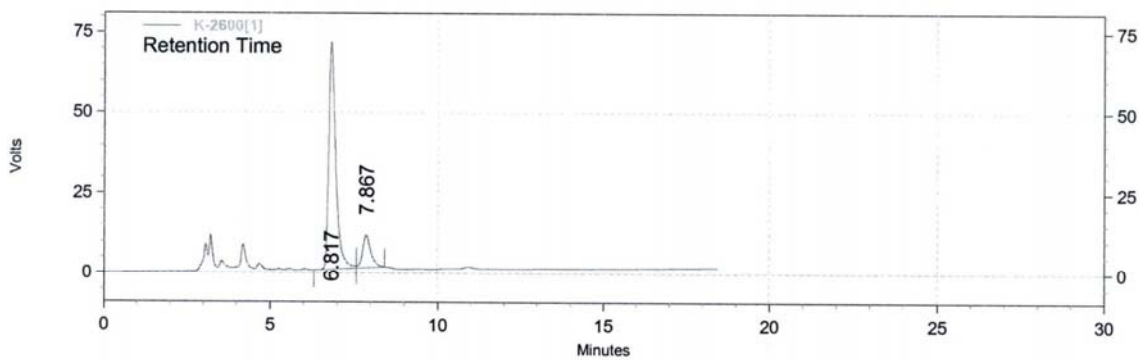

**K-2600[1] Results**

| Retention Time | Area    | Area % | Height | Height % |
|----------------|---------|--------|--------|----------|
| 6.817          | 1034880 | 85.65  | 70828  | 87.48    |
| 7.867          | 173435  | 14.35  | 10138  | 12.52    |

Table 2, entry 8

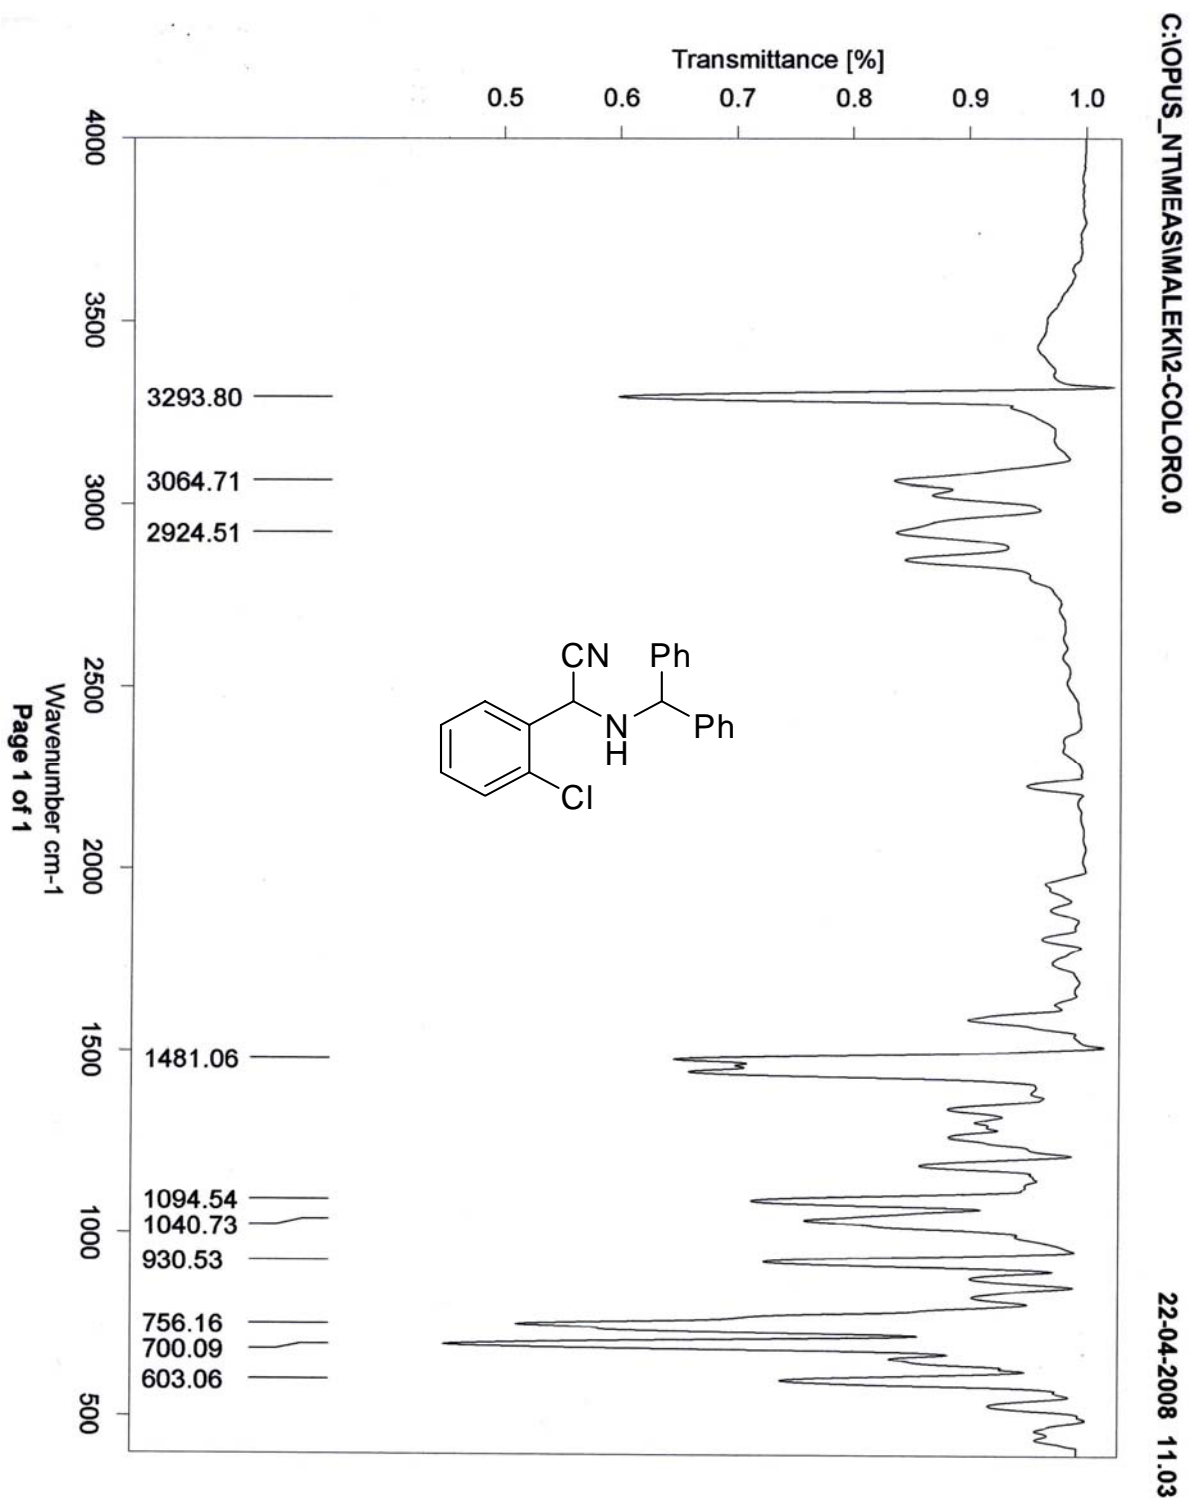

Table 2, entry 9

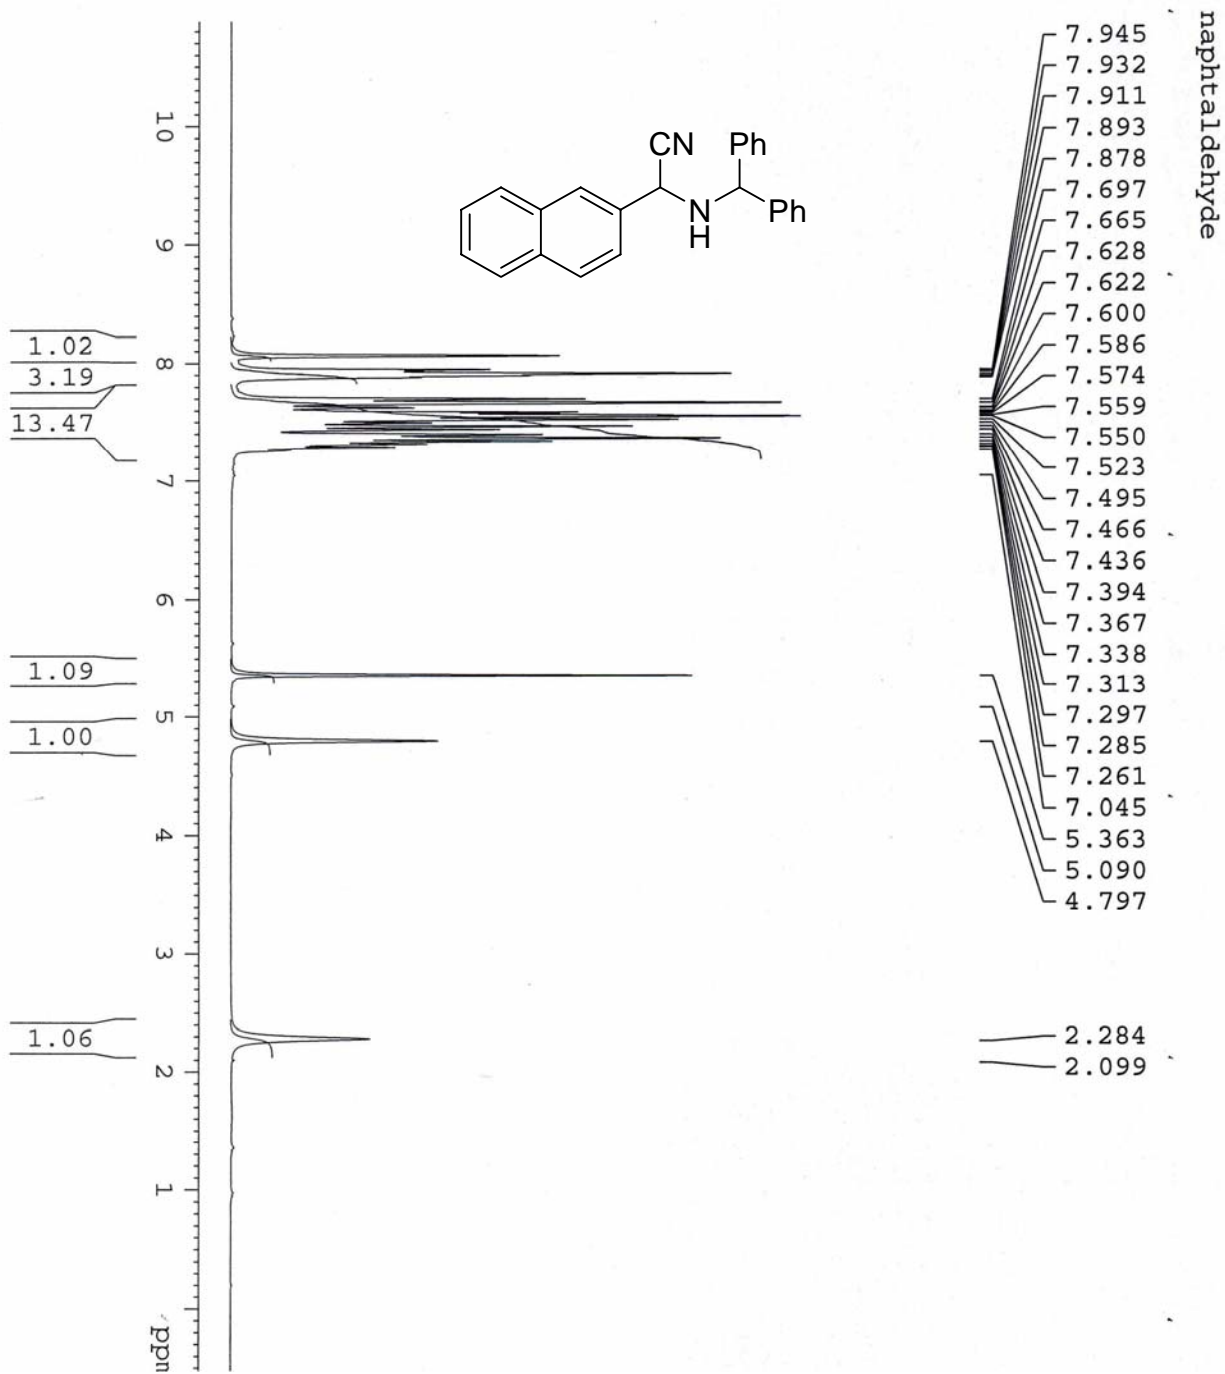

Table 2, entry 9

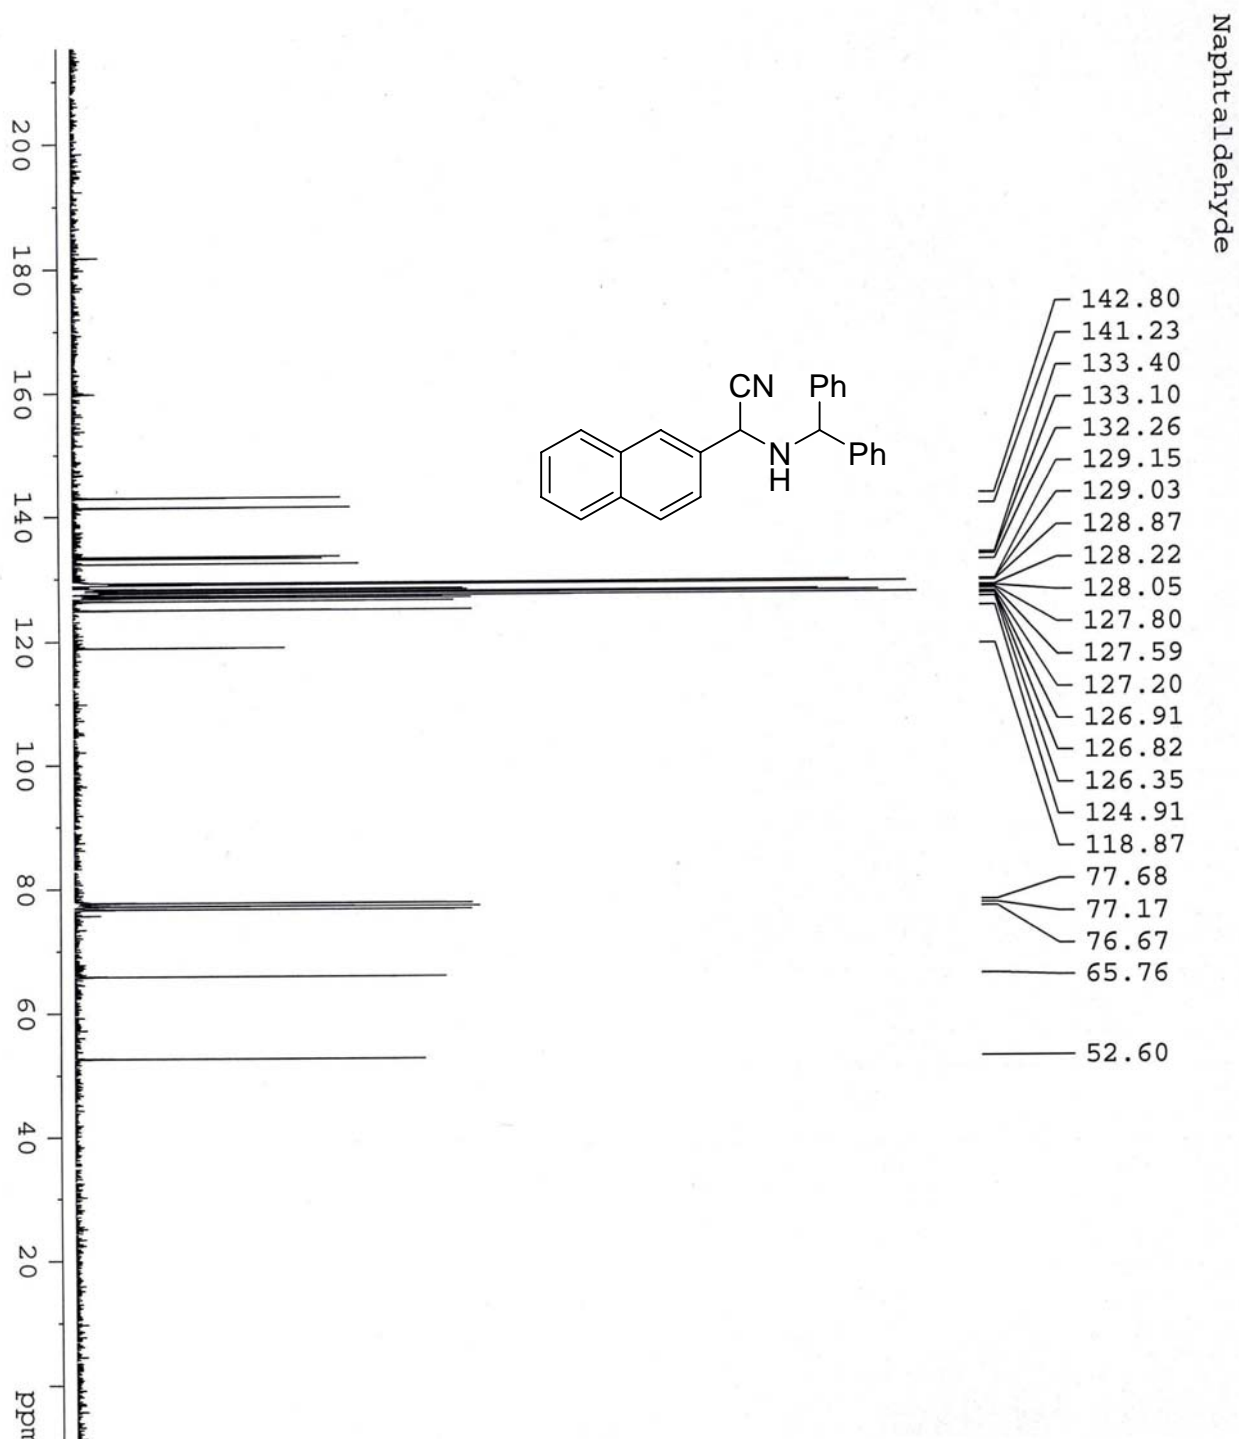

Table 2, entry 9

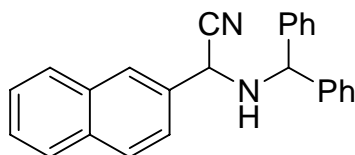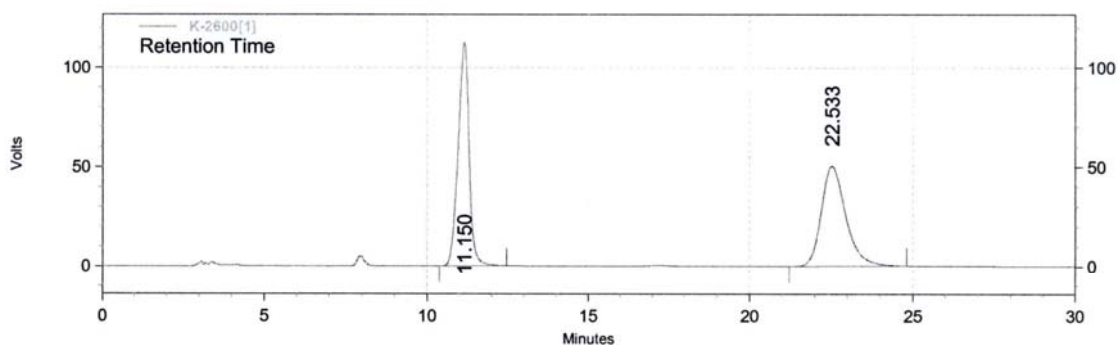

**K-2600[1] Results**

| Retention Time | Area    | Area % | Height | Height % |
|----------------|---------|--------|--------|----------|
| 11.150         | 2648054 | 50.25  | 112474 | 69.08    |
| 22.533         | 2622141 | 49.75  | 50334  | 30.92    |

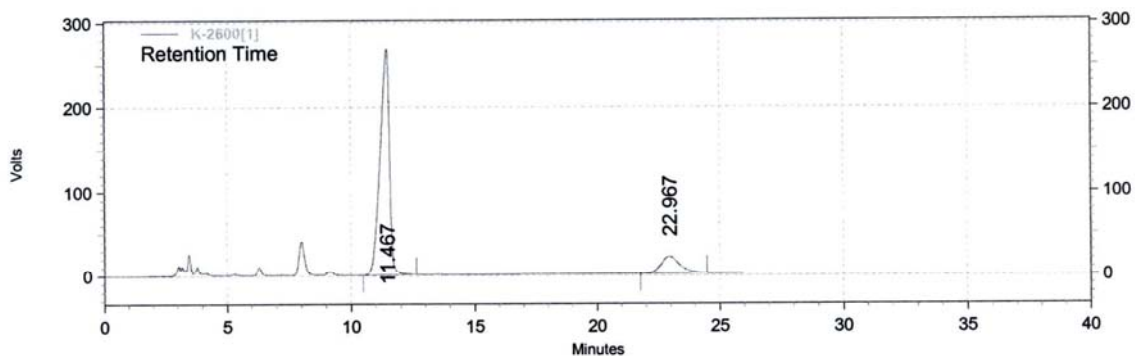

**K-2600[1] Results**

| Retention Time | Area    | Area % | Height | Height % |
|----------------|---------|--------|--------|----------|
| 11.467         | 6974077 | 86.87  | 267763 | 93.00    |
| 22.967         | 1054496 | 13.13  | 20149  | 7.00     |

Table 2, entry 9

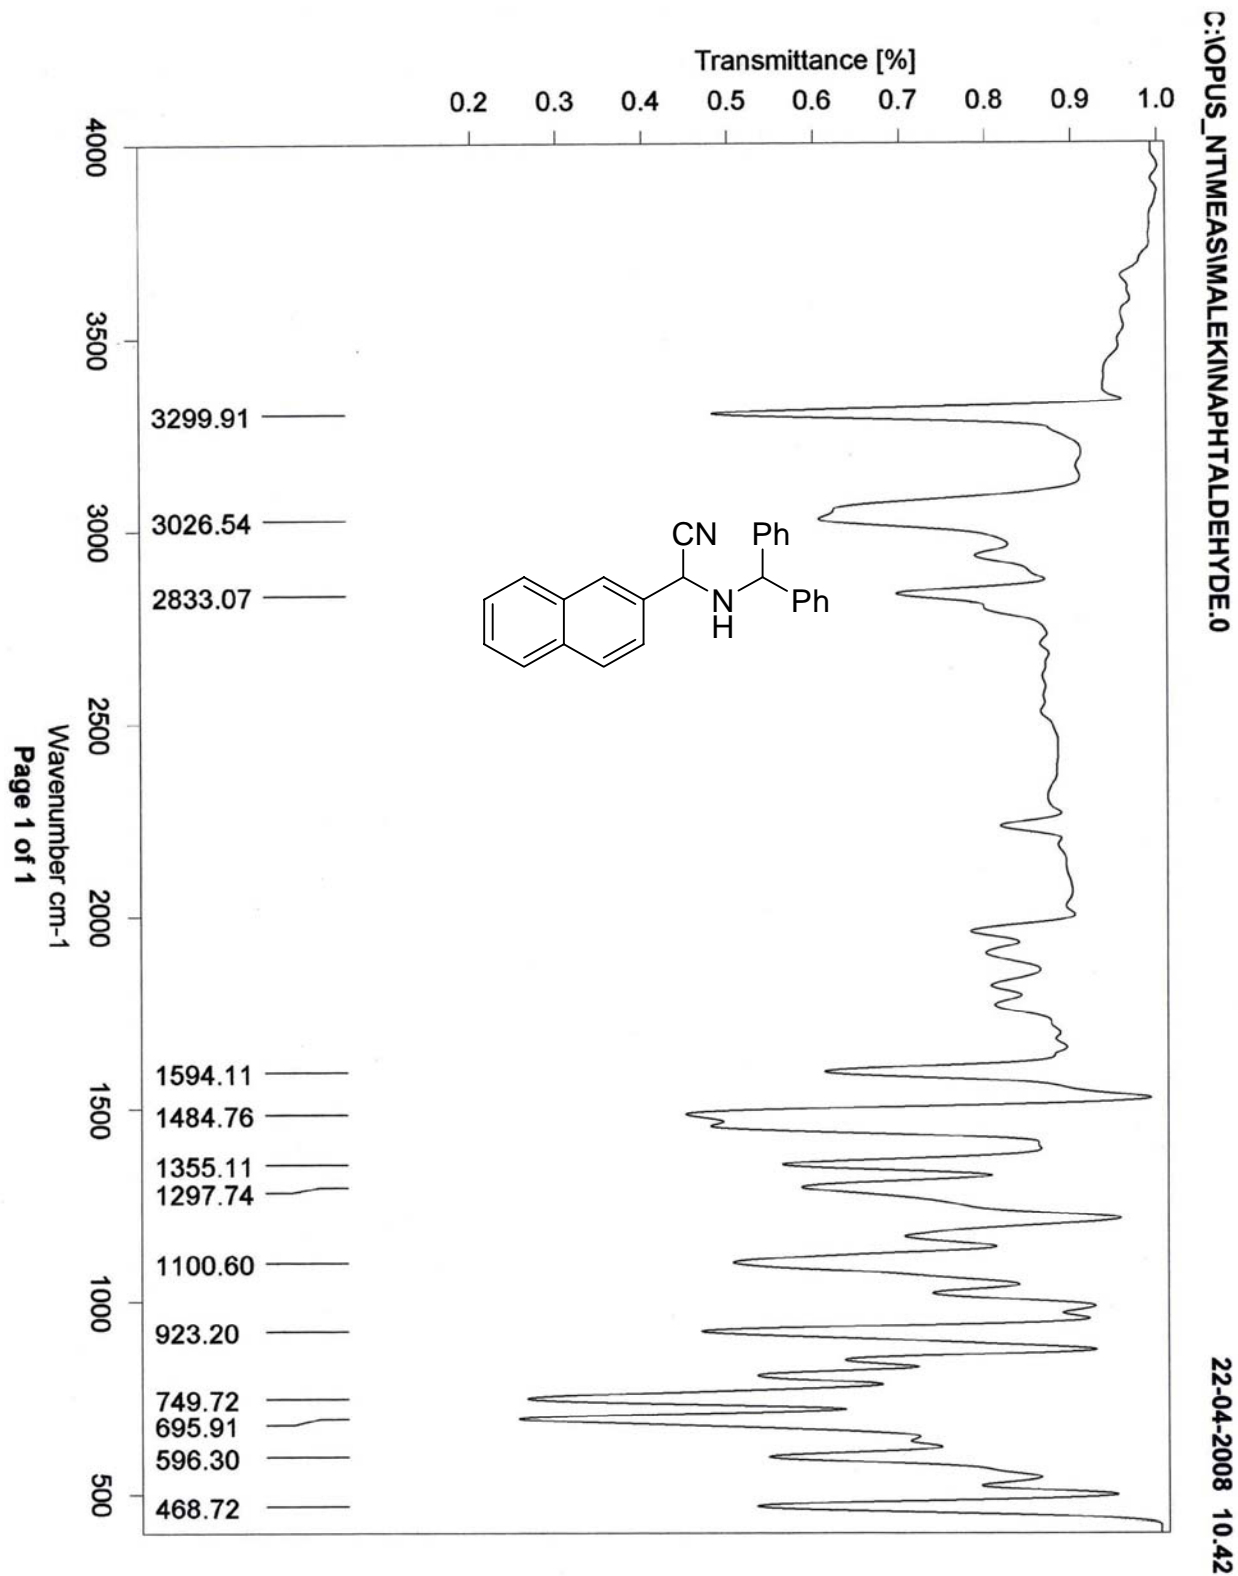

Table 2, entry 10

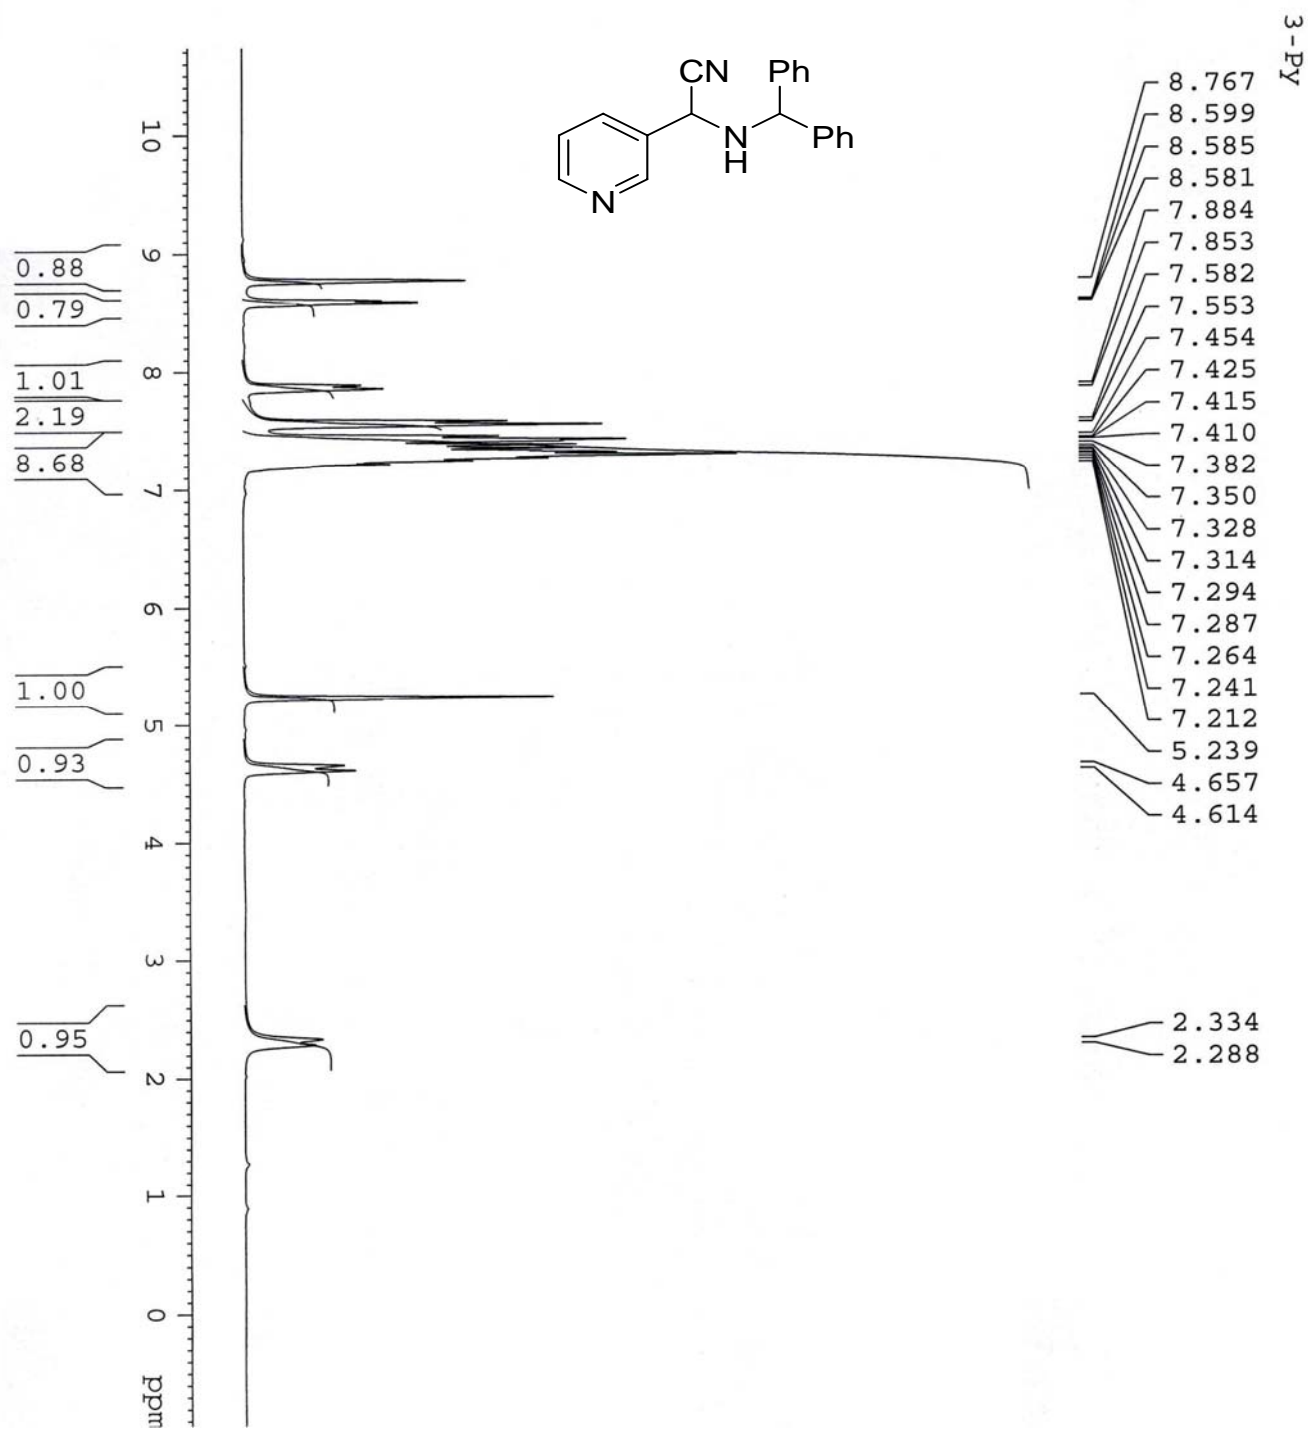

**Table 2, entry 10**

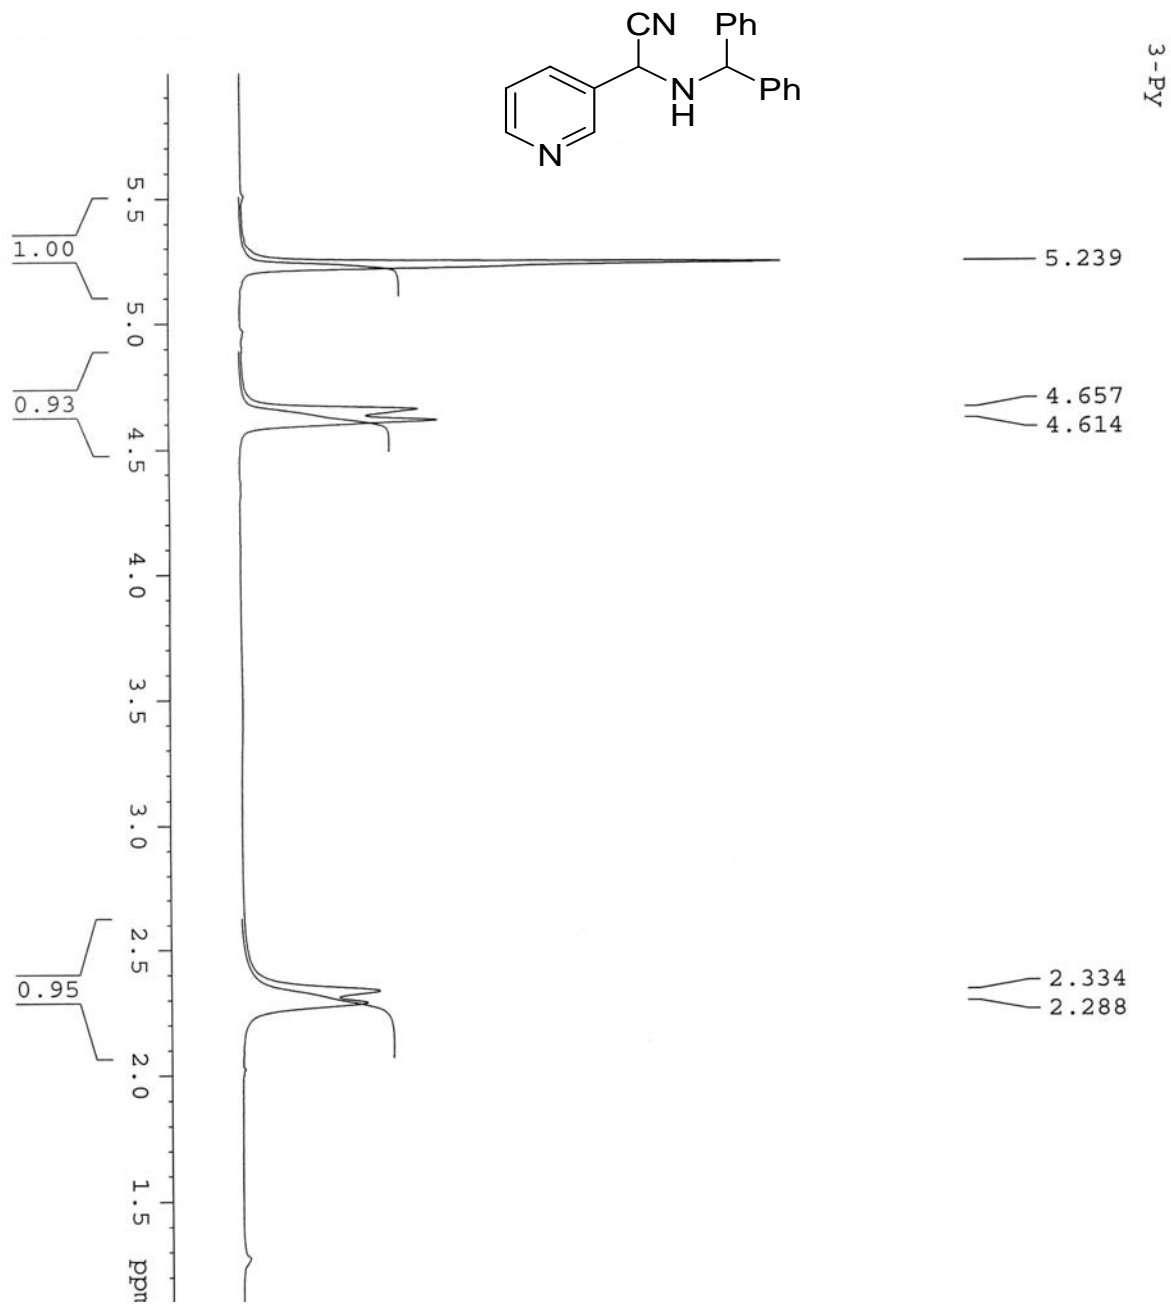



Table 2, entry 10

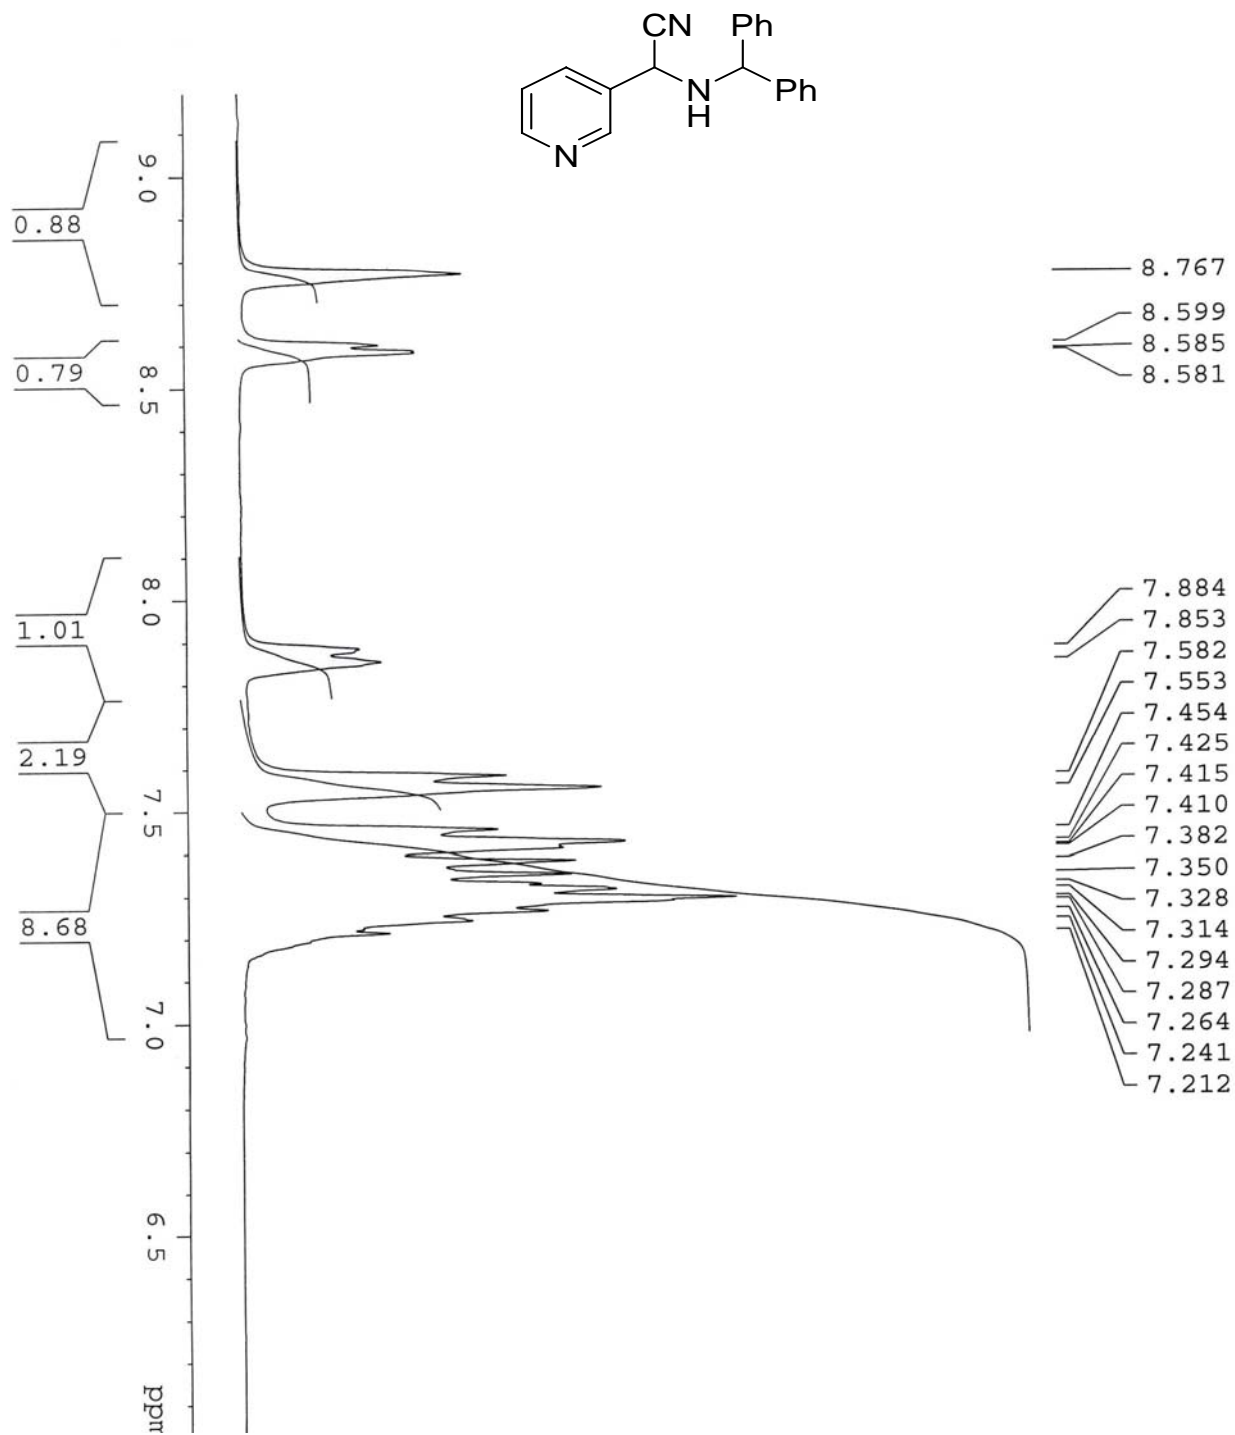

Table 2, entry 10

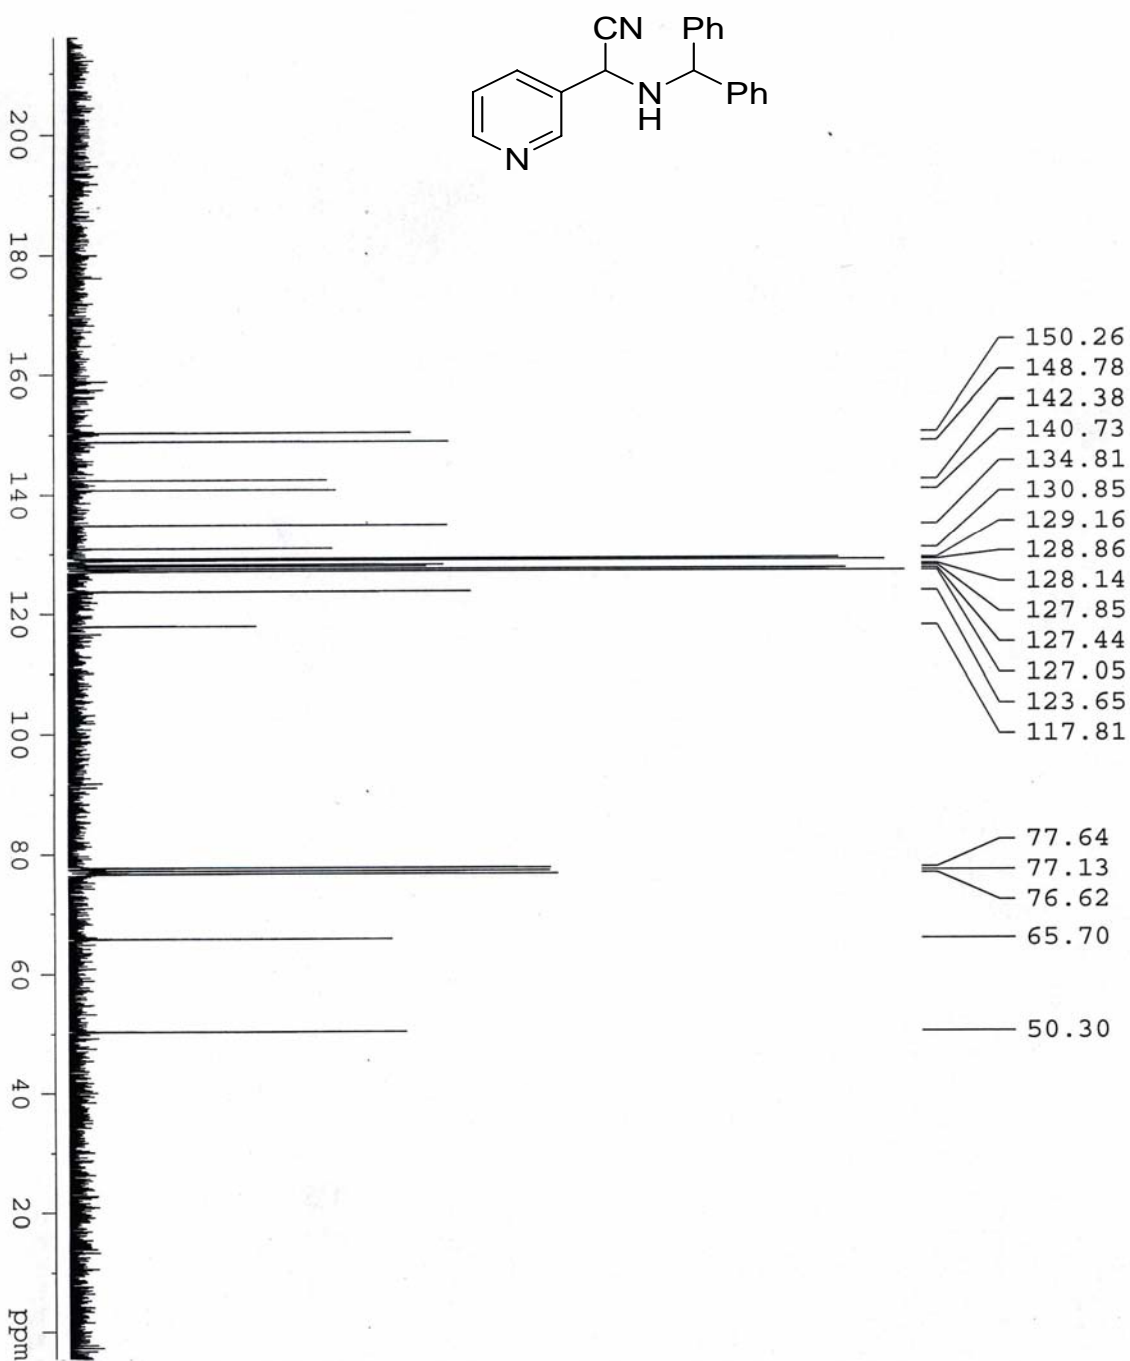

Table 2, entry 10

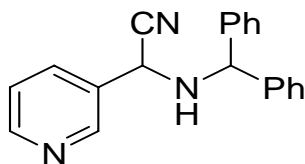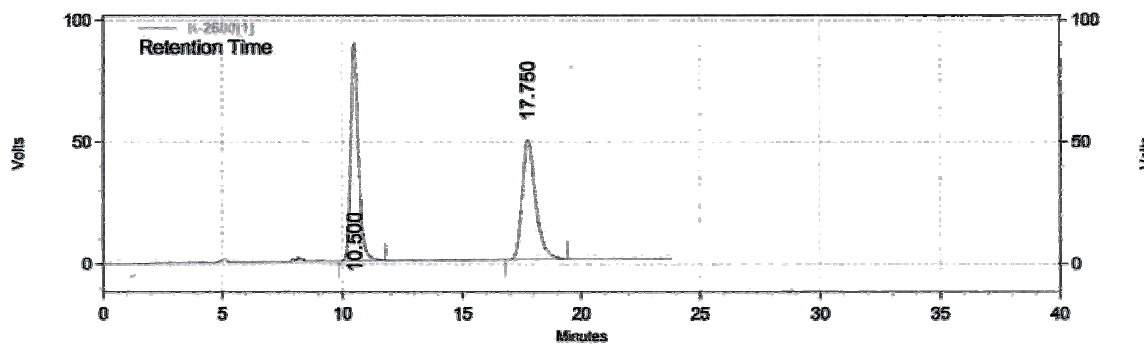

**K-2600[1] Results**

| Retention Time | Area    | Area % | Height | Height % |
|----------------|---------|--------|--------|----------|
| 10.500         | 1986564 | 50.85  | 89324  | 64.66    |
| 17.750         | 1920132 | 49.15  | 48824  | 35.34    |

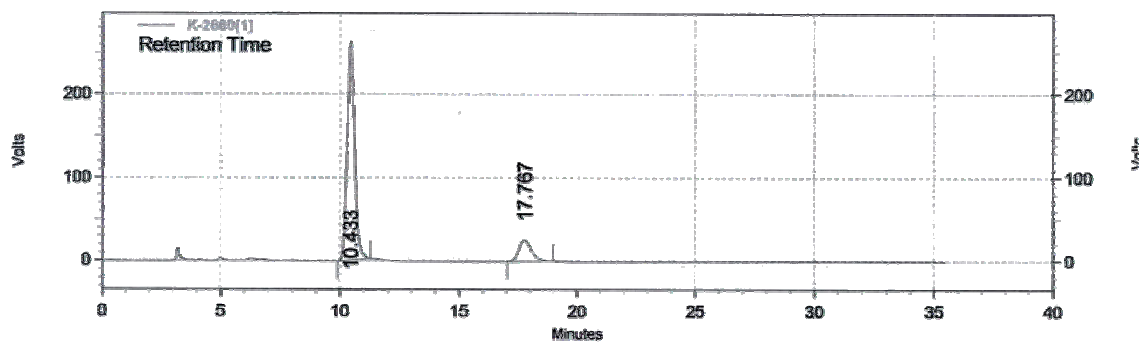

**K-2600[1] Results**

| Retention Time | Area    | Area % | Height | Height % |
|----------------|---------|--------|--------|----------|
| 10.433         | 5698977 | 85.34  | 263652 | 91.17    |
| 17.767         | 979255  | 14.66  | 25524  | 8.83     |

**Table 2, entry 10**

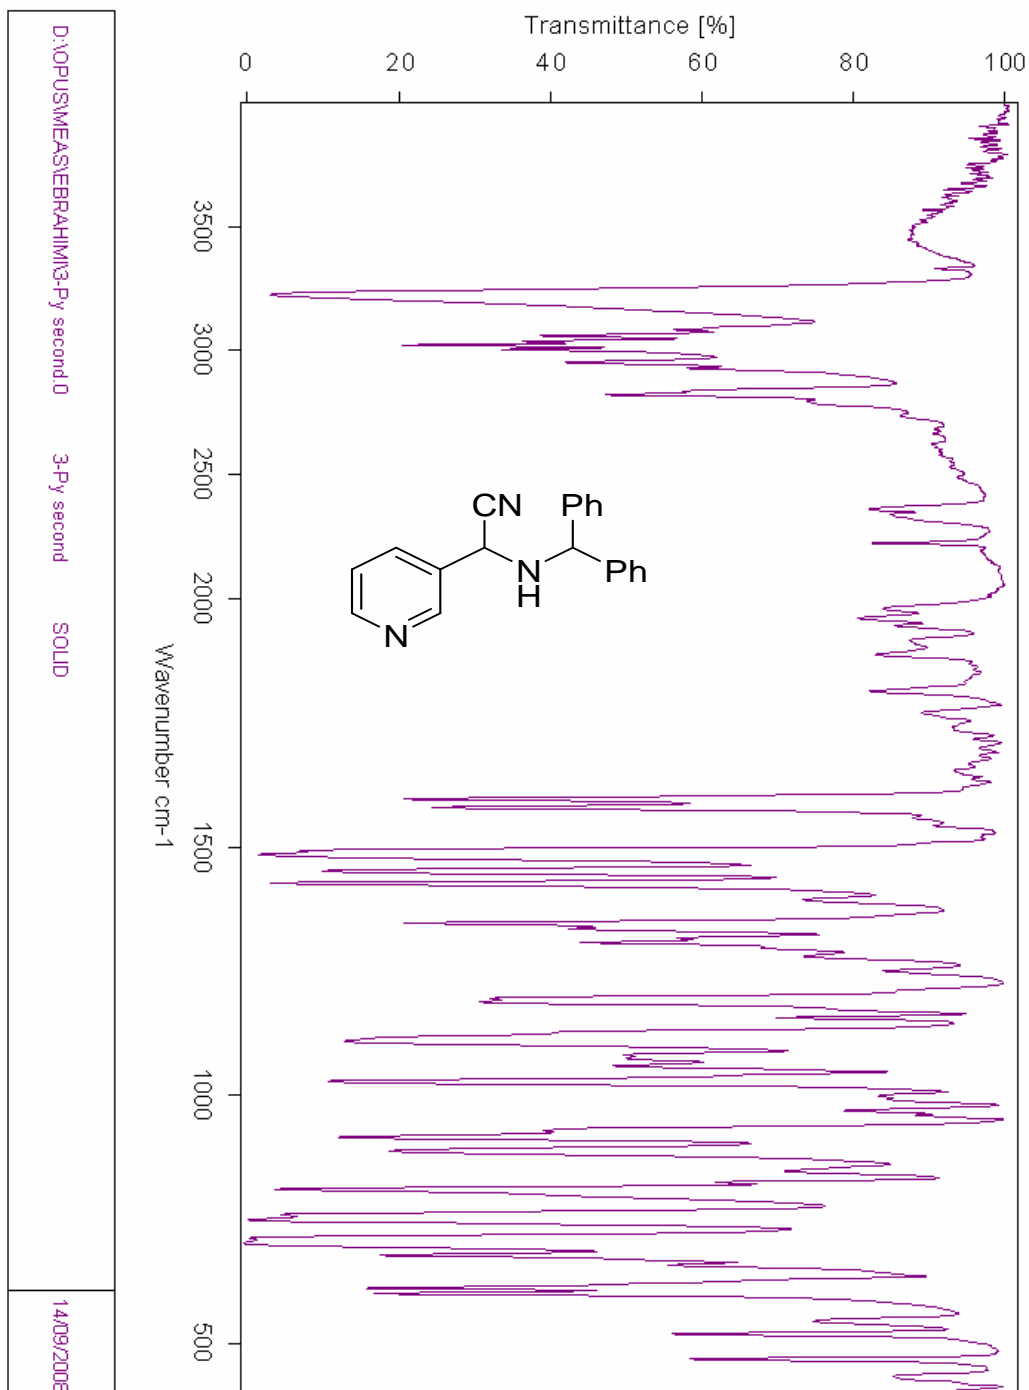

Table 2, entry 11

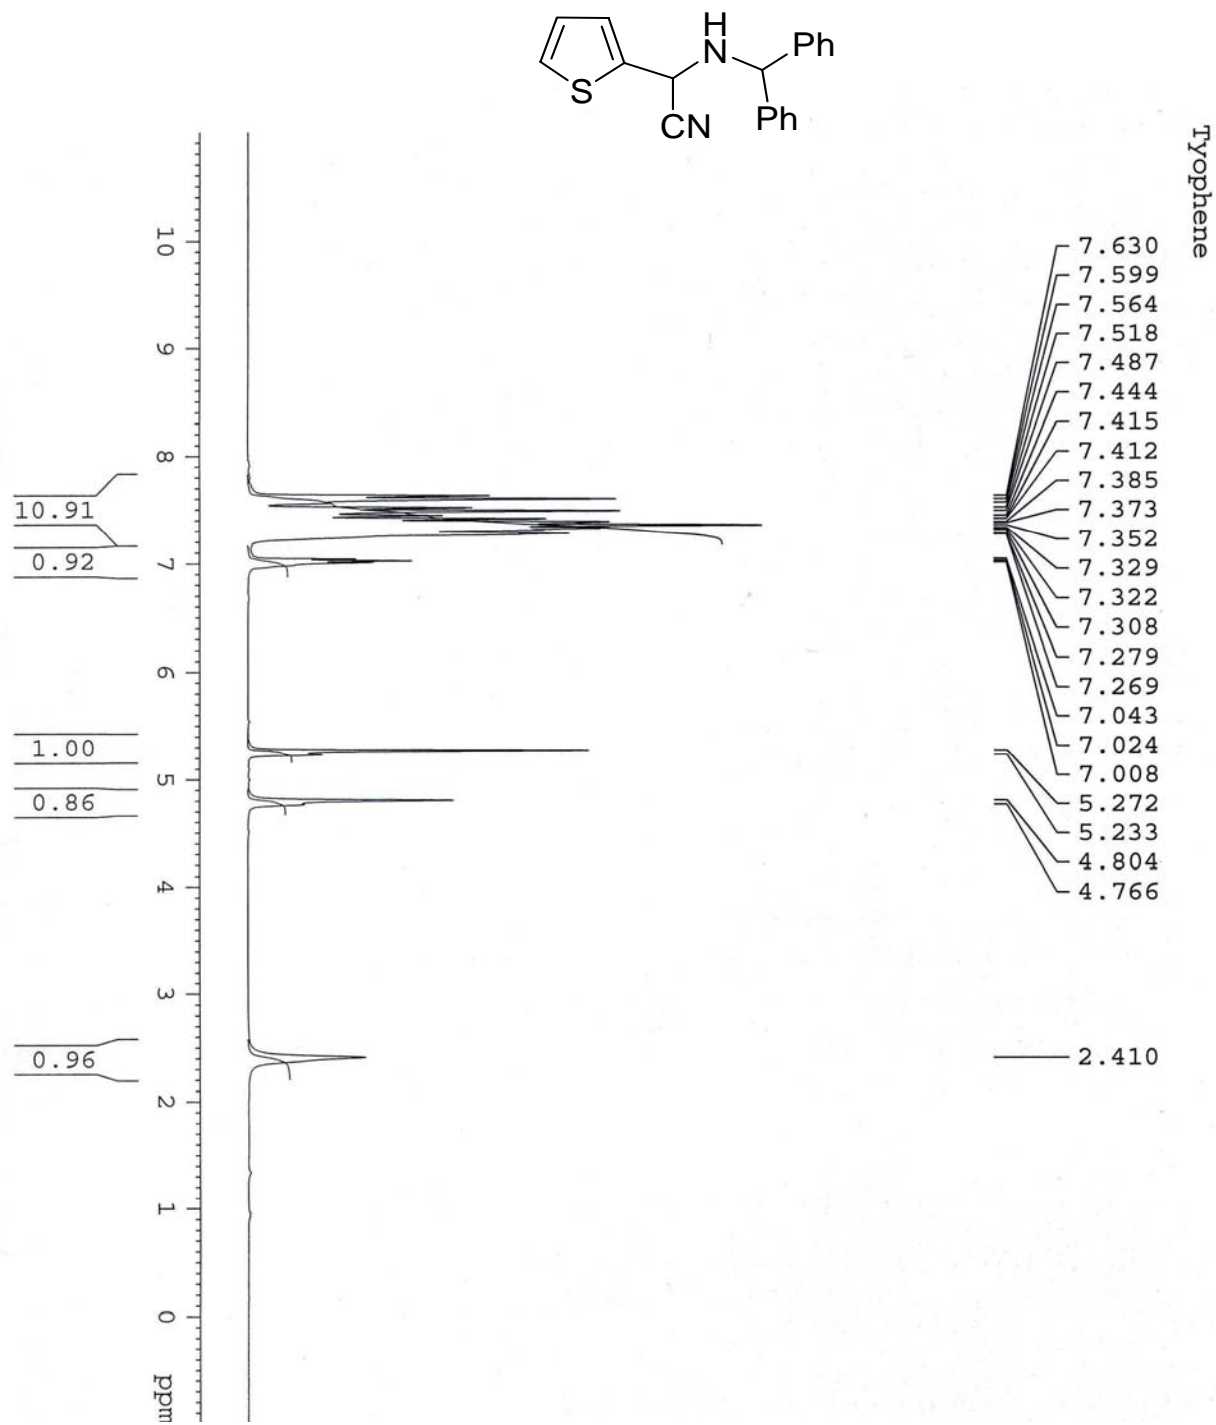

**Table 2, entry 11**

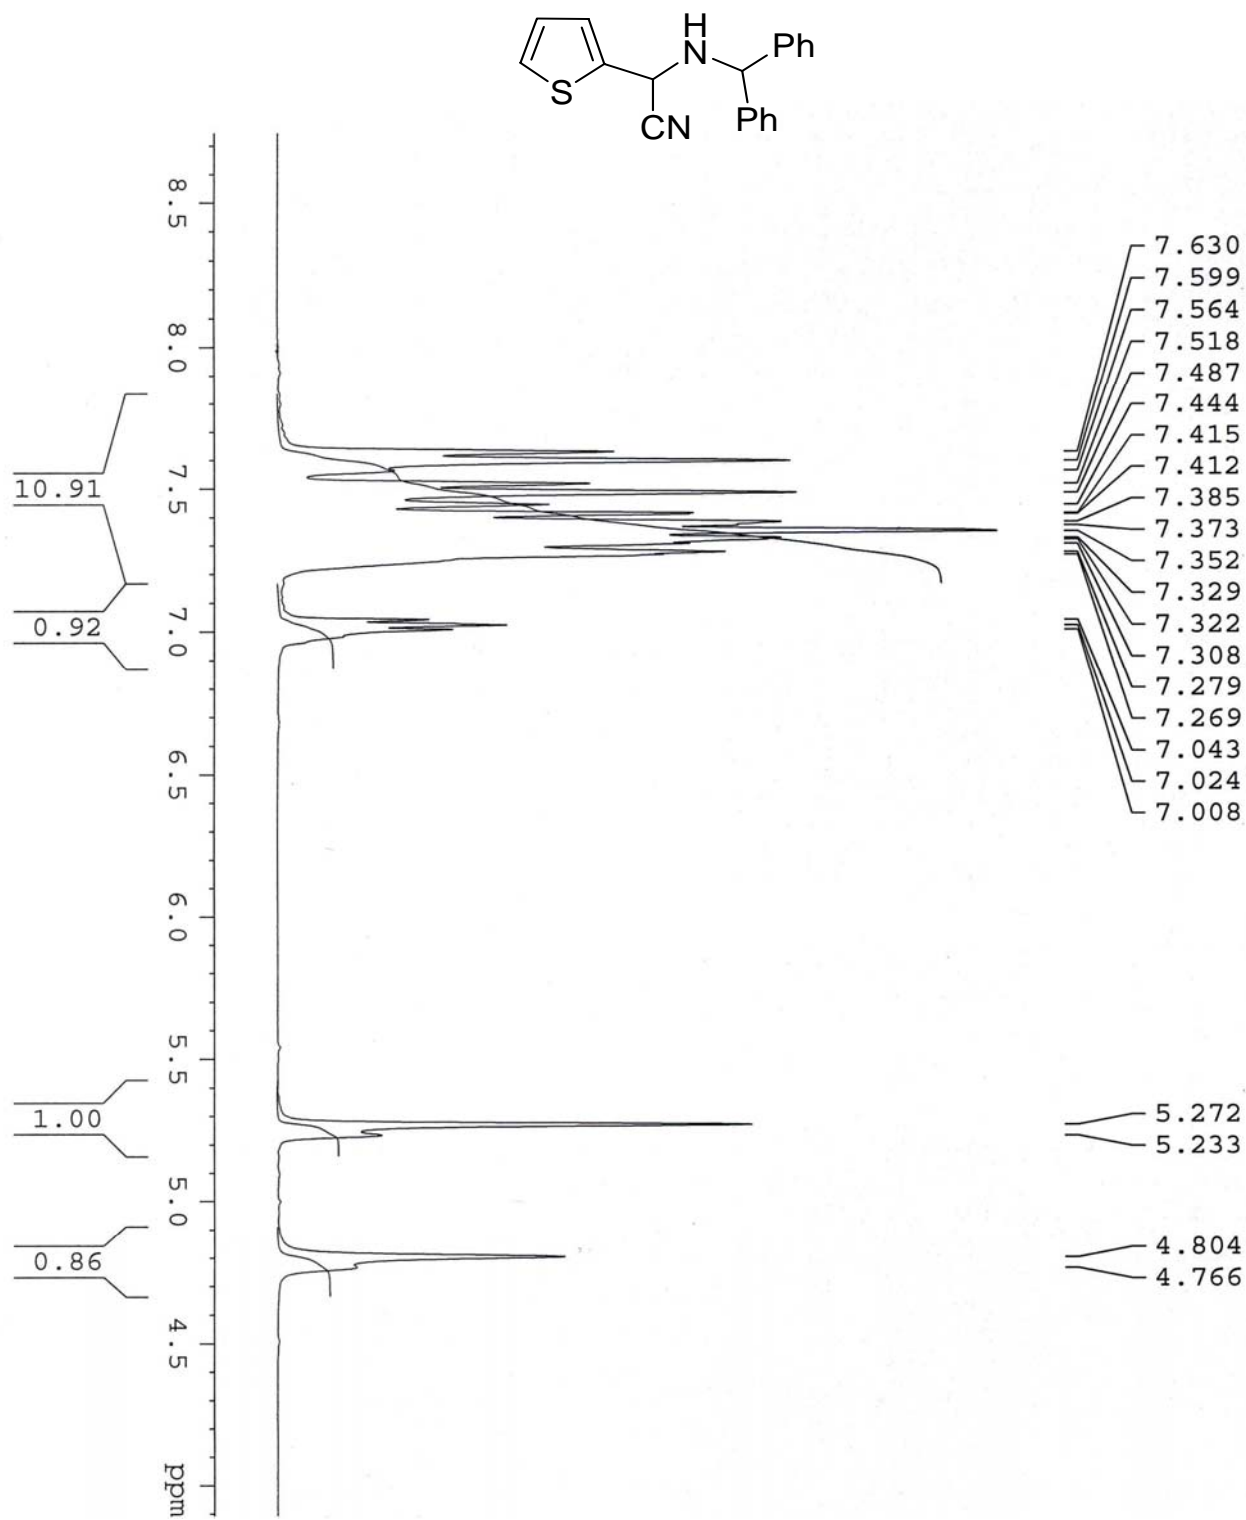

Table 2, entry 11

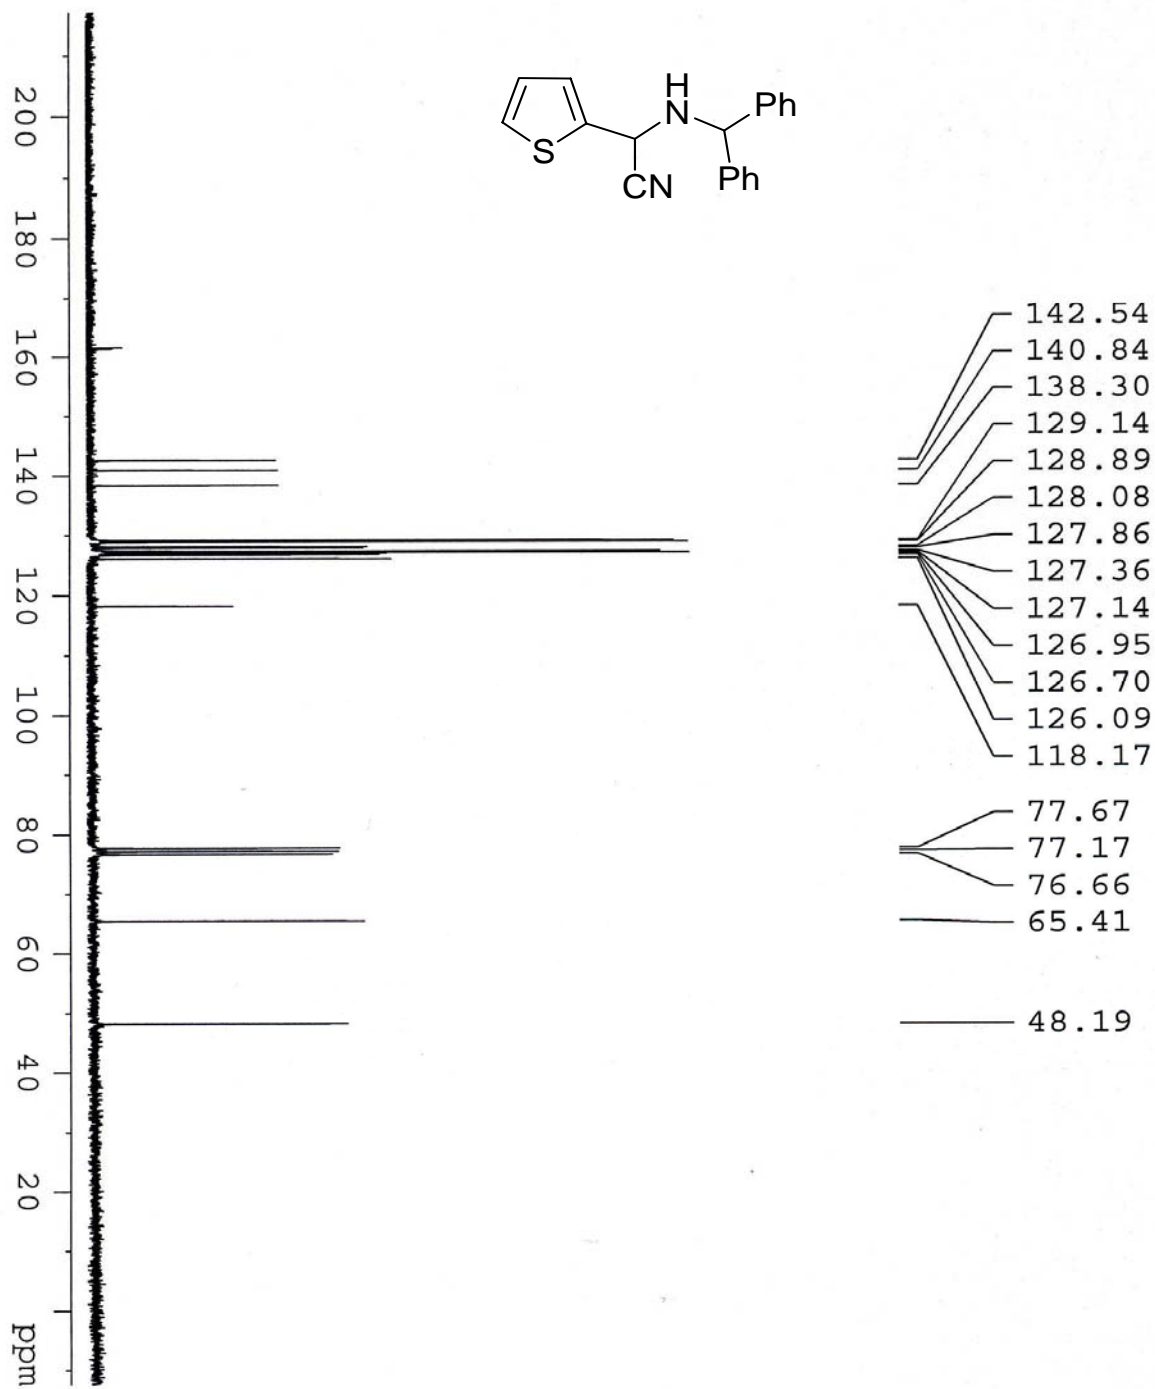

Table 2, entry 11

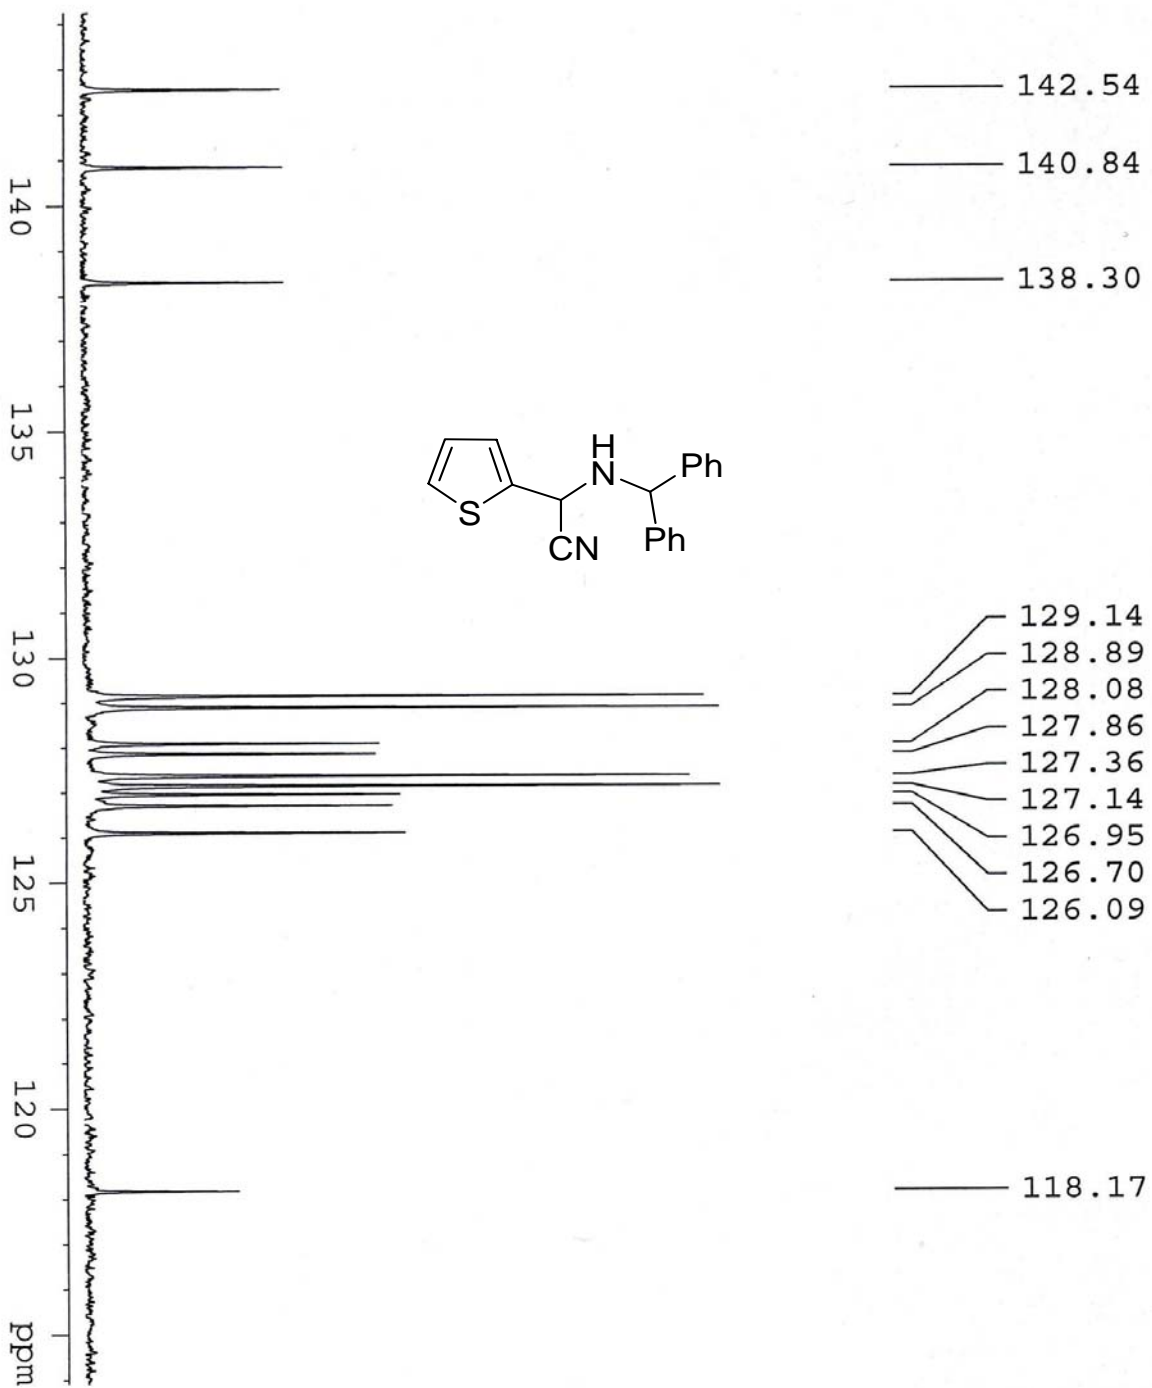



Table 2, entry 11

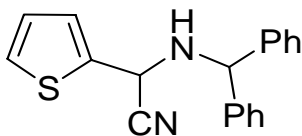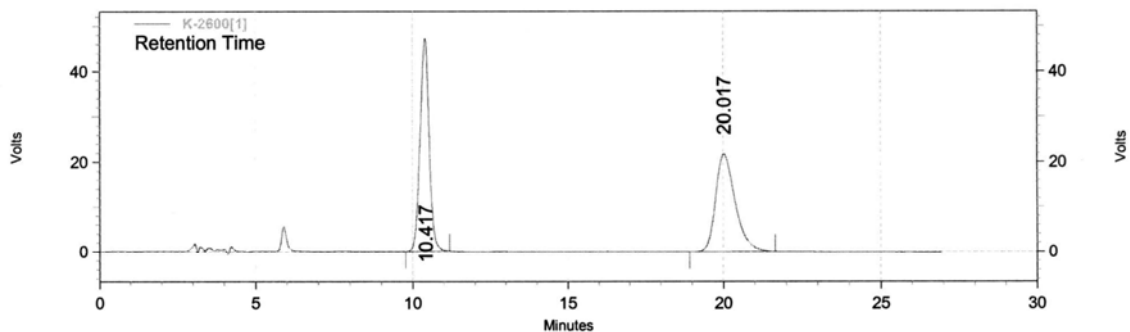

**K-2600[1] Results**

| Retention Time | Area   | Area % | Height | Height % |
|----------------|--------|--------|--------|----------|
| 10.417         | 953695 | 50.42  | 47119  | 68.46    |
| 20.017         | 937706 | 49.58  | 21711  | 31.54    |

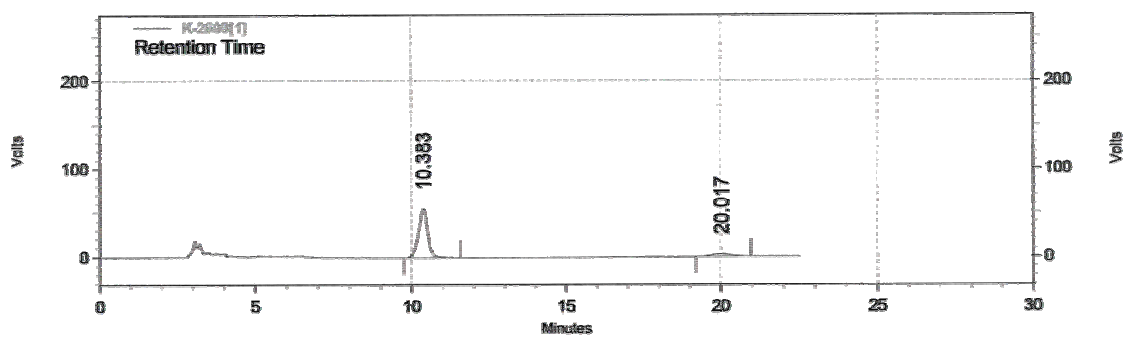

**K-2600[1] Results**

| Retention Time | Area    | Area % | Height | Height % |
|----------------|---------|--------|--------|----------|
| 10.383         | 1131489 | 90.96  | 54828  | 95.21    |
| 20.017         | 112486  | 9.04   | 2761   | 4.79     |

Table 2, entry 11

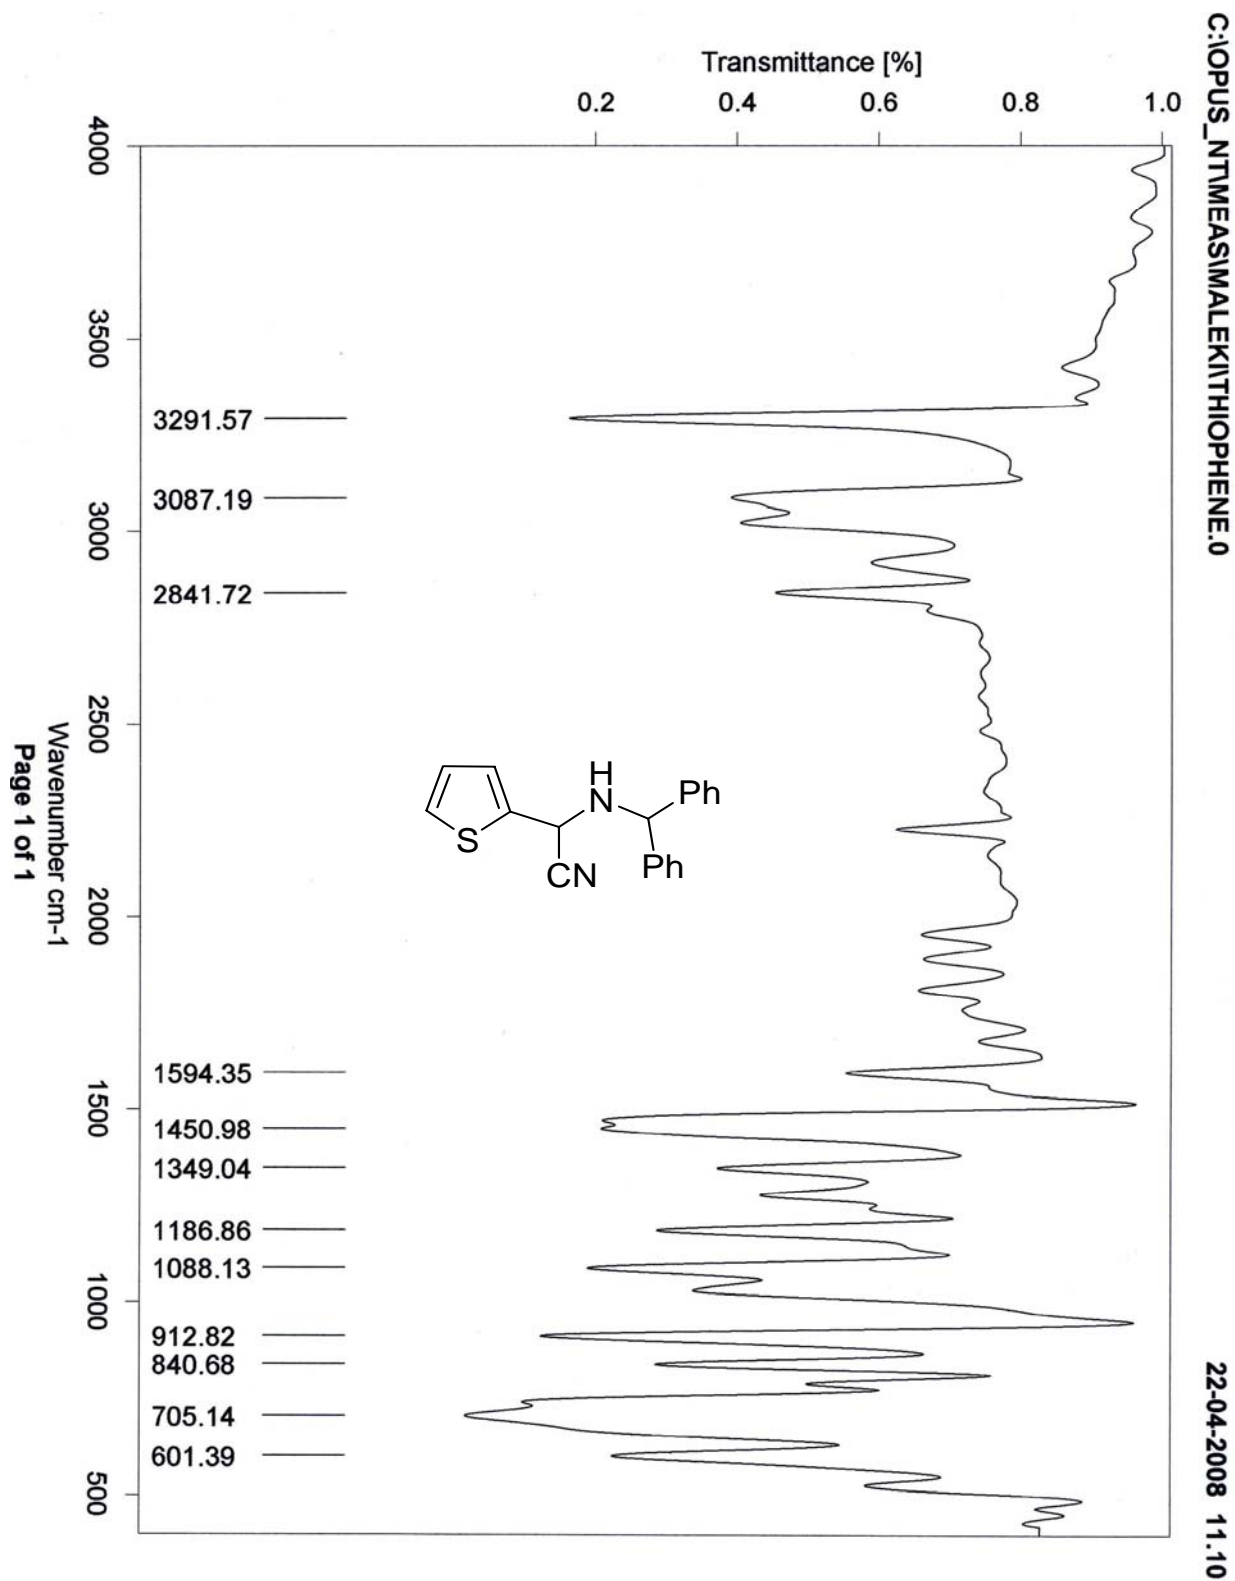

Table 2, entry 12

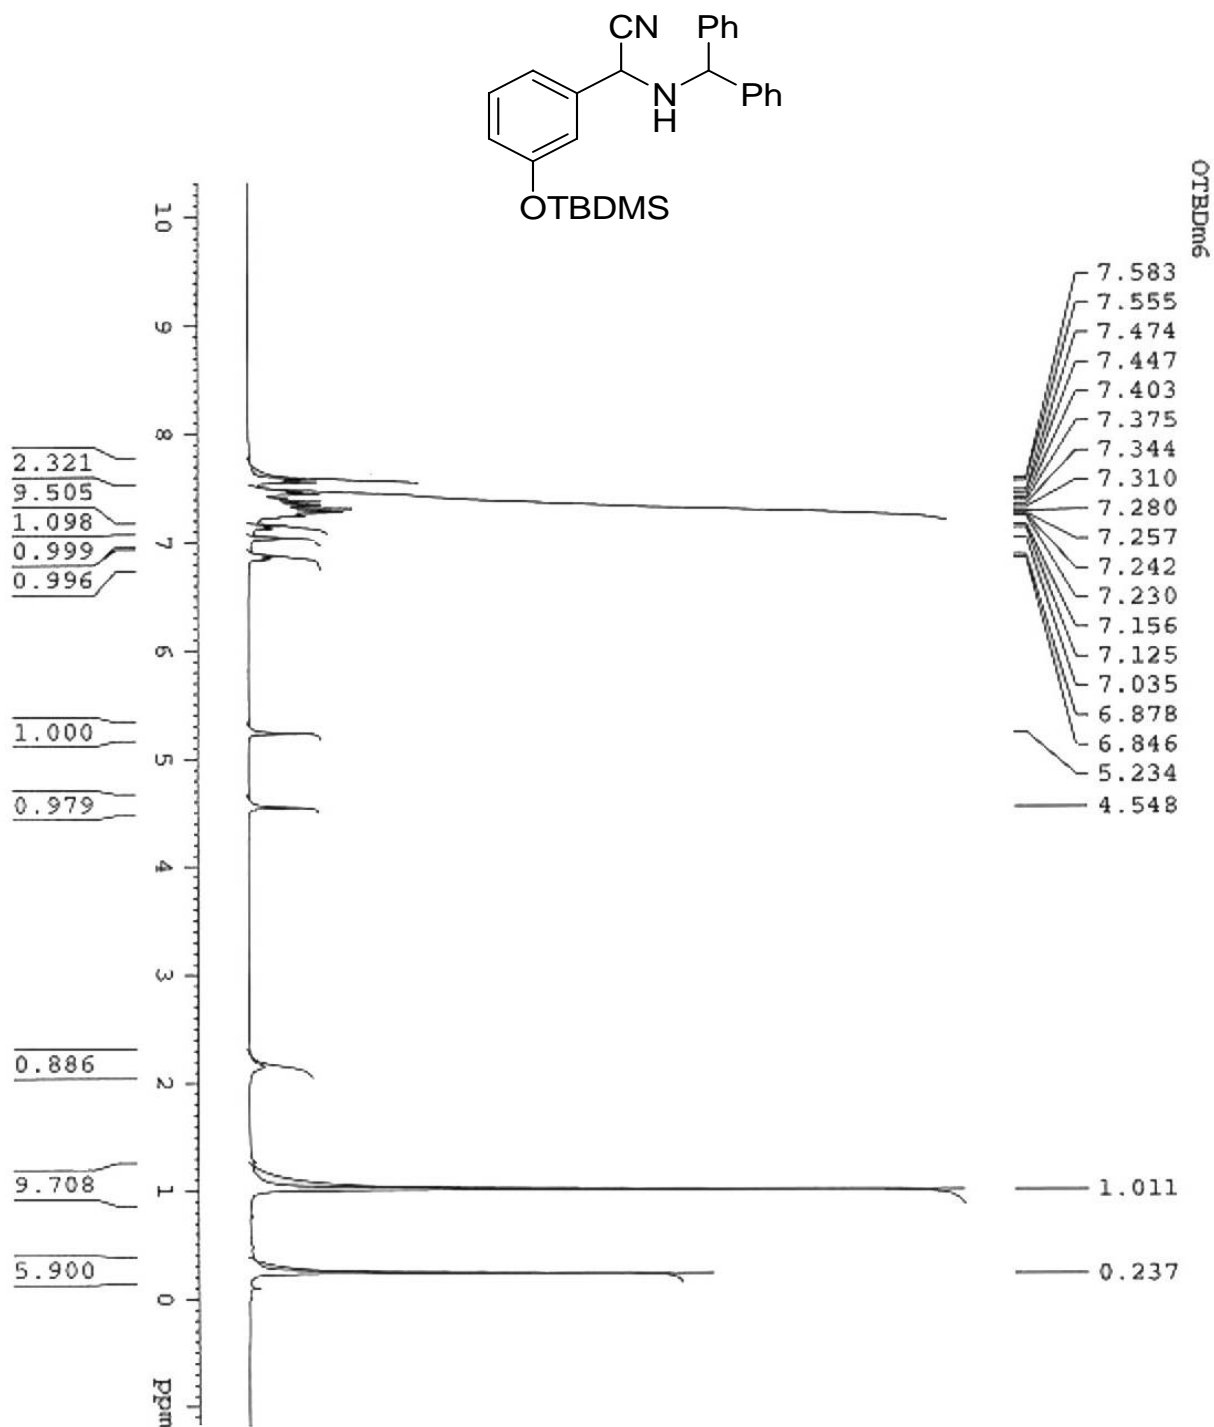

Table 2, entry 12

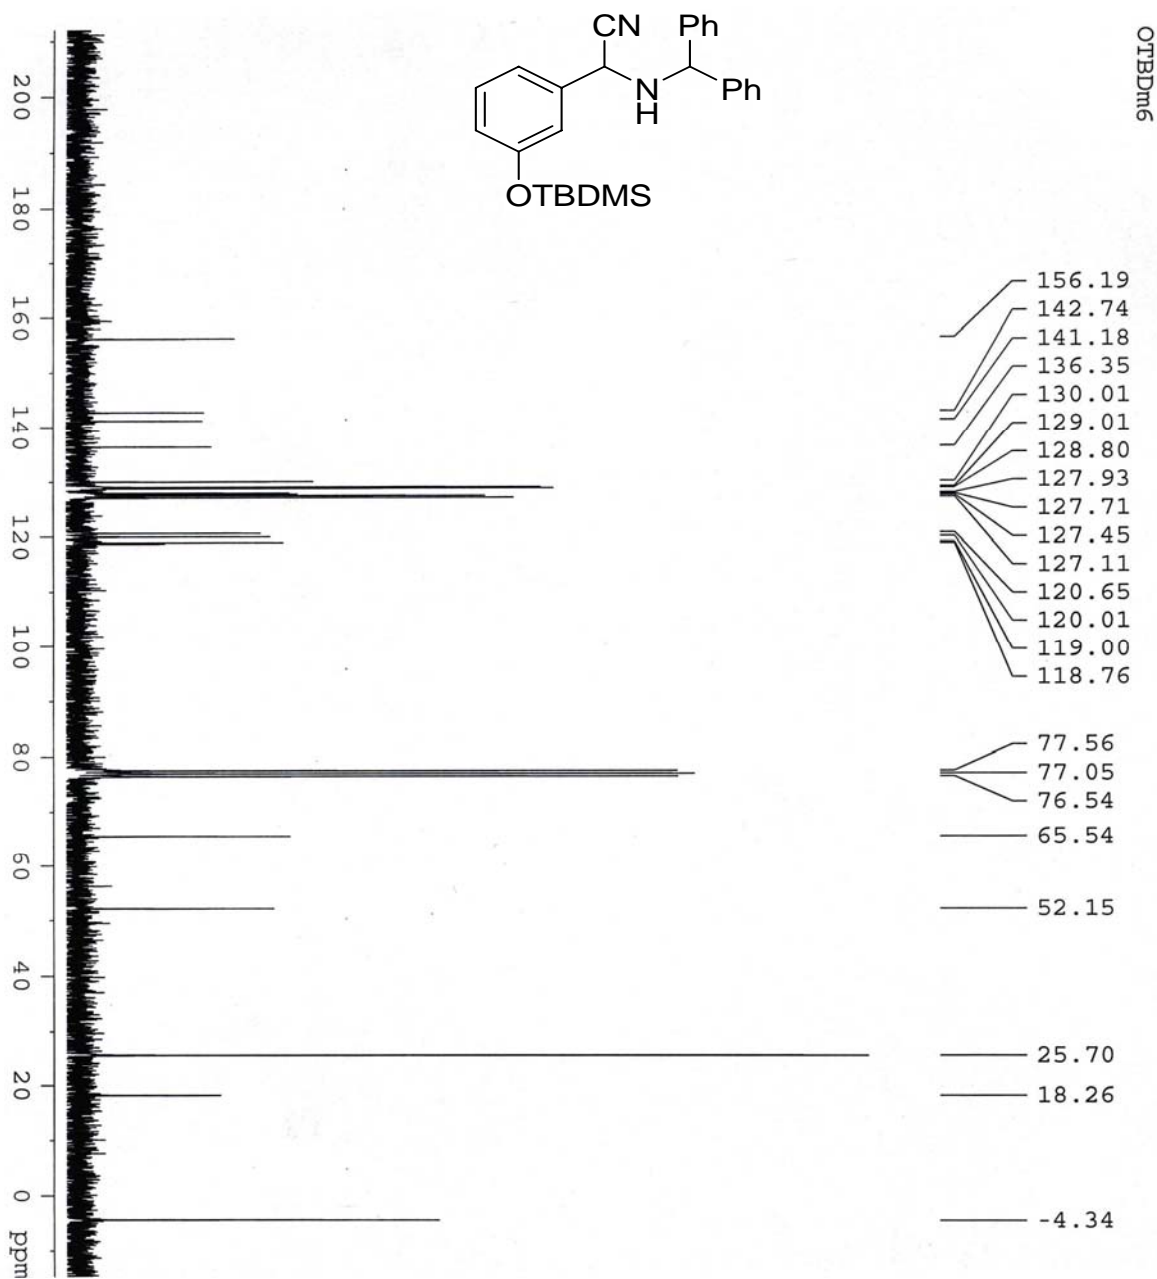

Table 2, entry 12

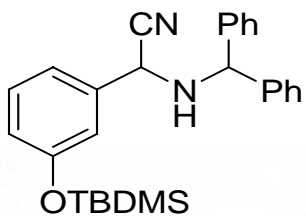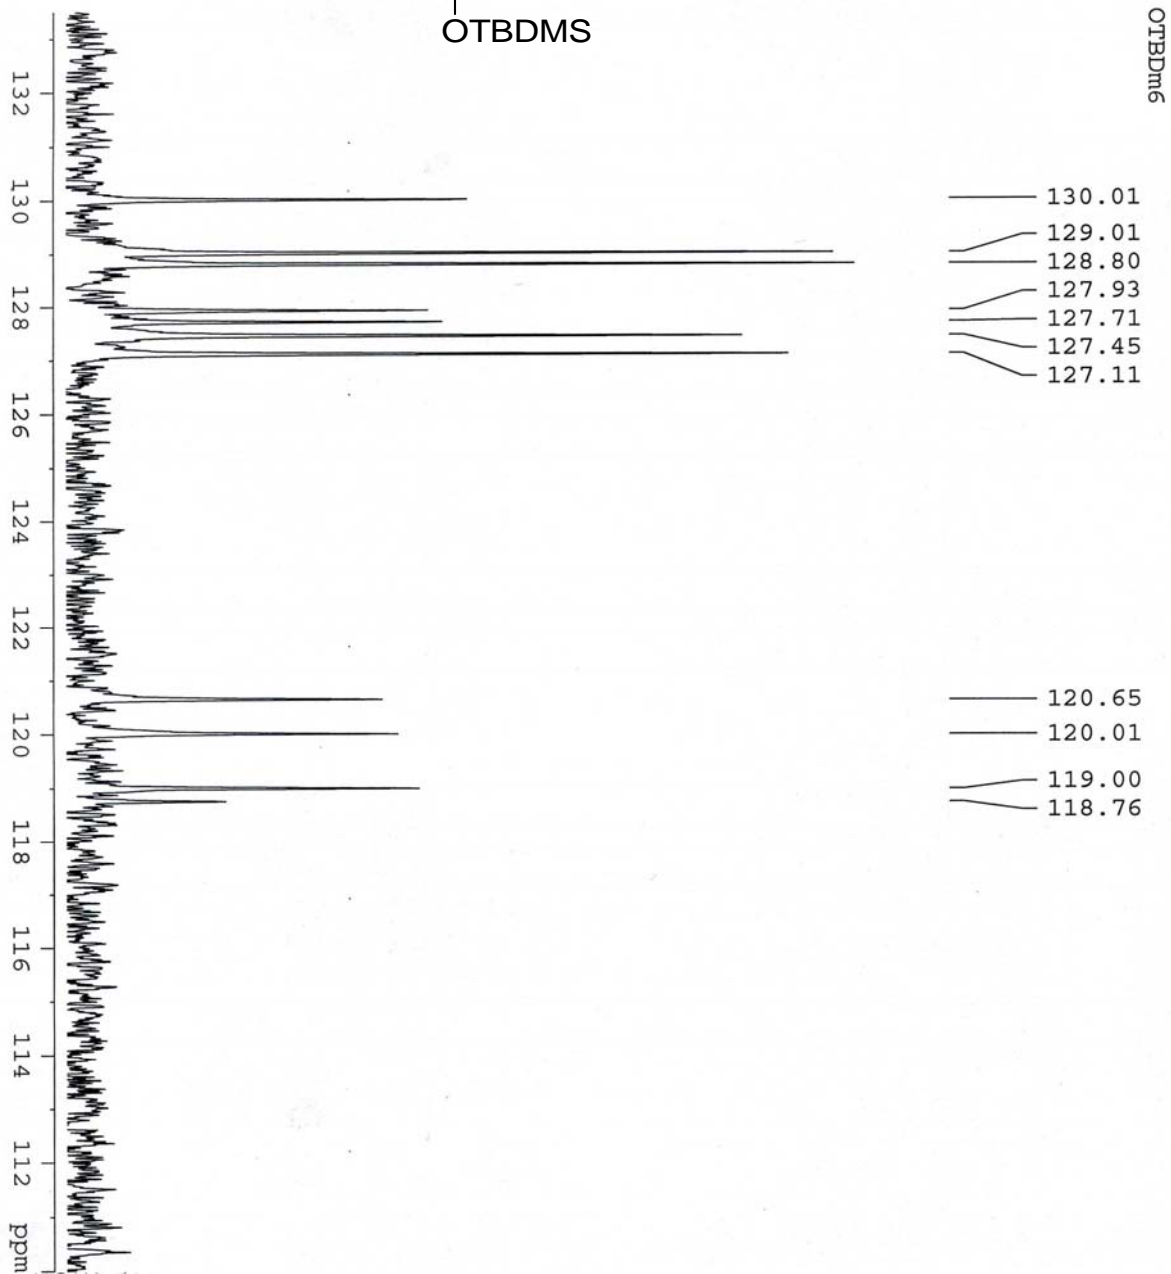

Table 2, entry 12

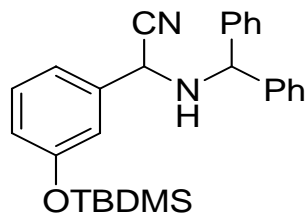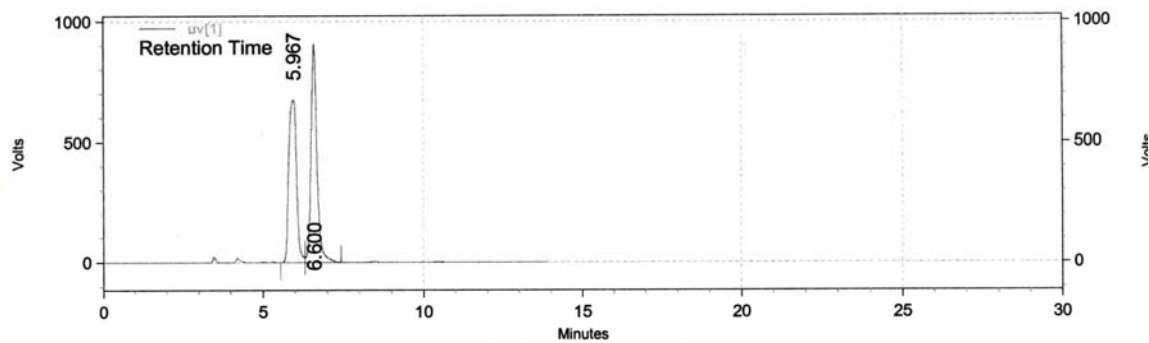

**uv[1] Results**

| Retention Time | Area     | Area % | Height | Height % |
|----------------|----------|--------|--------|----------|
| 5.967          | 11315805 | 49.35  | 674347 | 42.60    |
| 6.600          | 11613978 | 50.65  | 908739 | 57.40    |

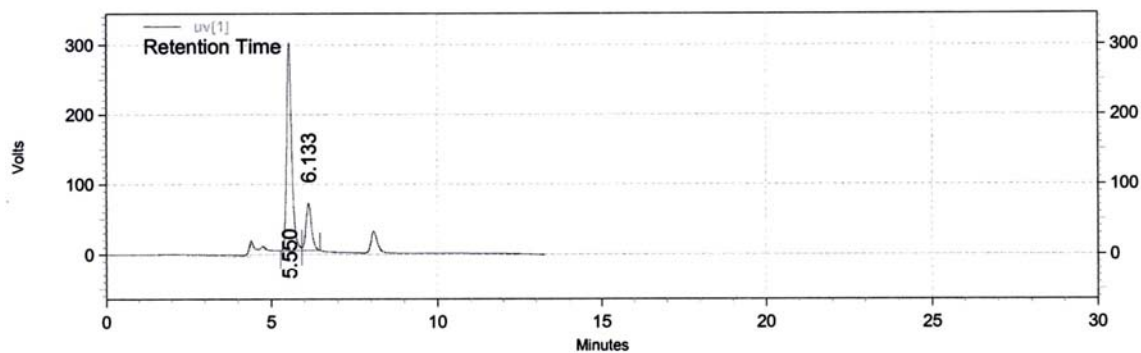

**uv[1] Results**

| Retention Time | Area    | Area % | Height | Height % |
|----------------|---------|--------|--------|----------|
| 5.550          | 3155739 | 80.26  | 298471 | 81.58    |
| 6.133          | 776370  | 19.74  | 67384  | 18.42    |

Table 2, entry 12

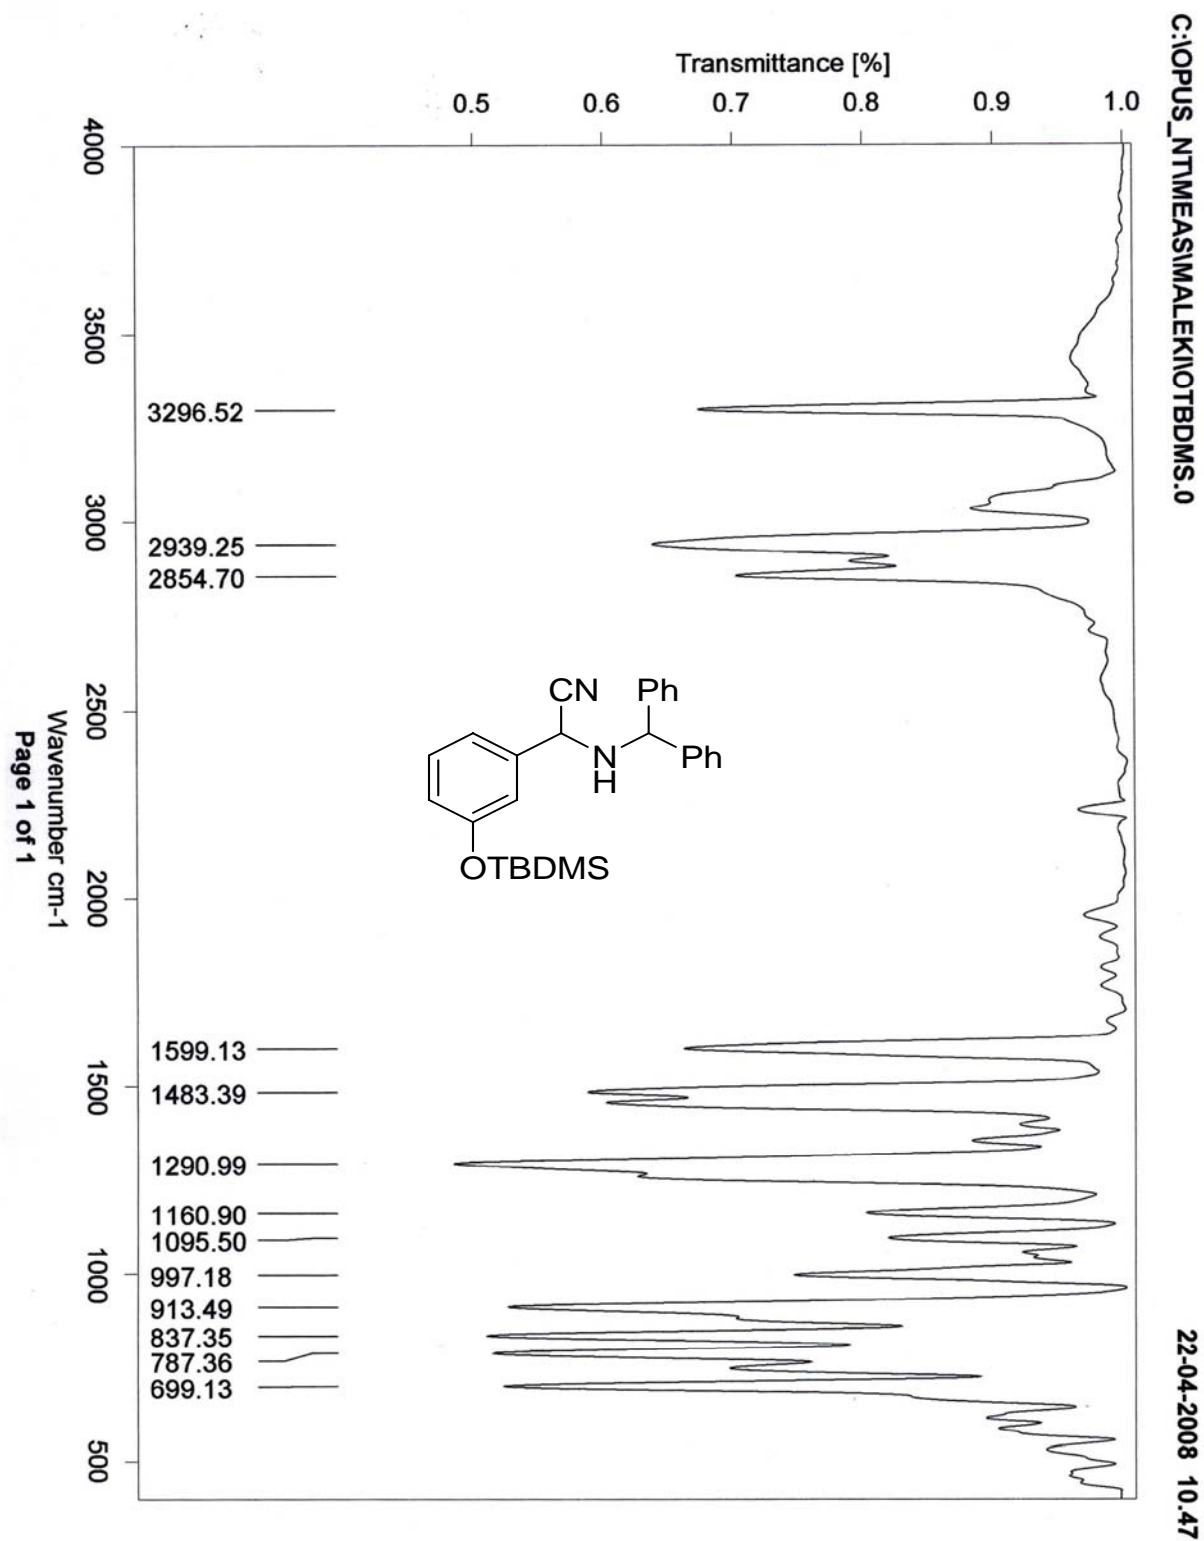

Table 2, entry 13

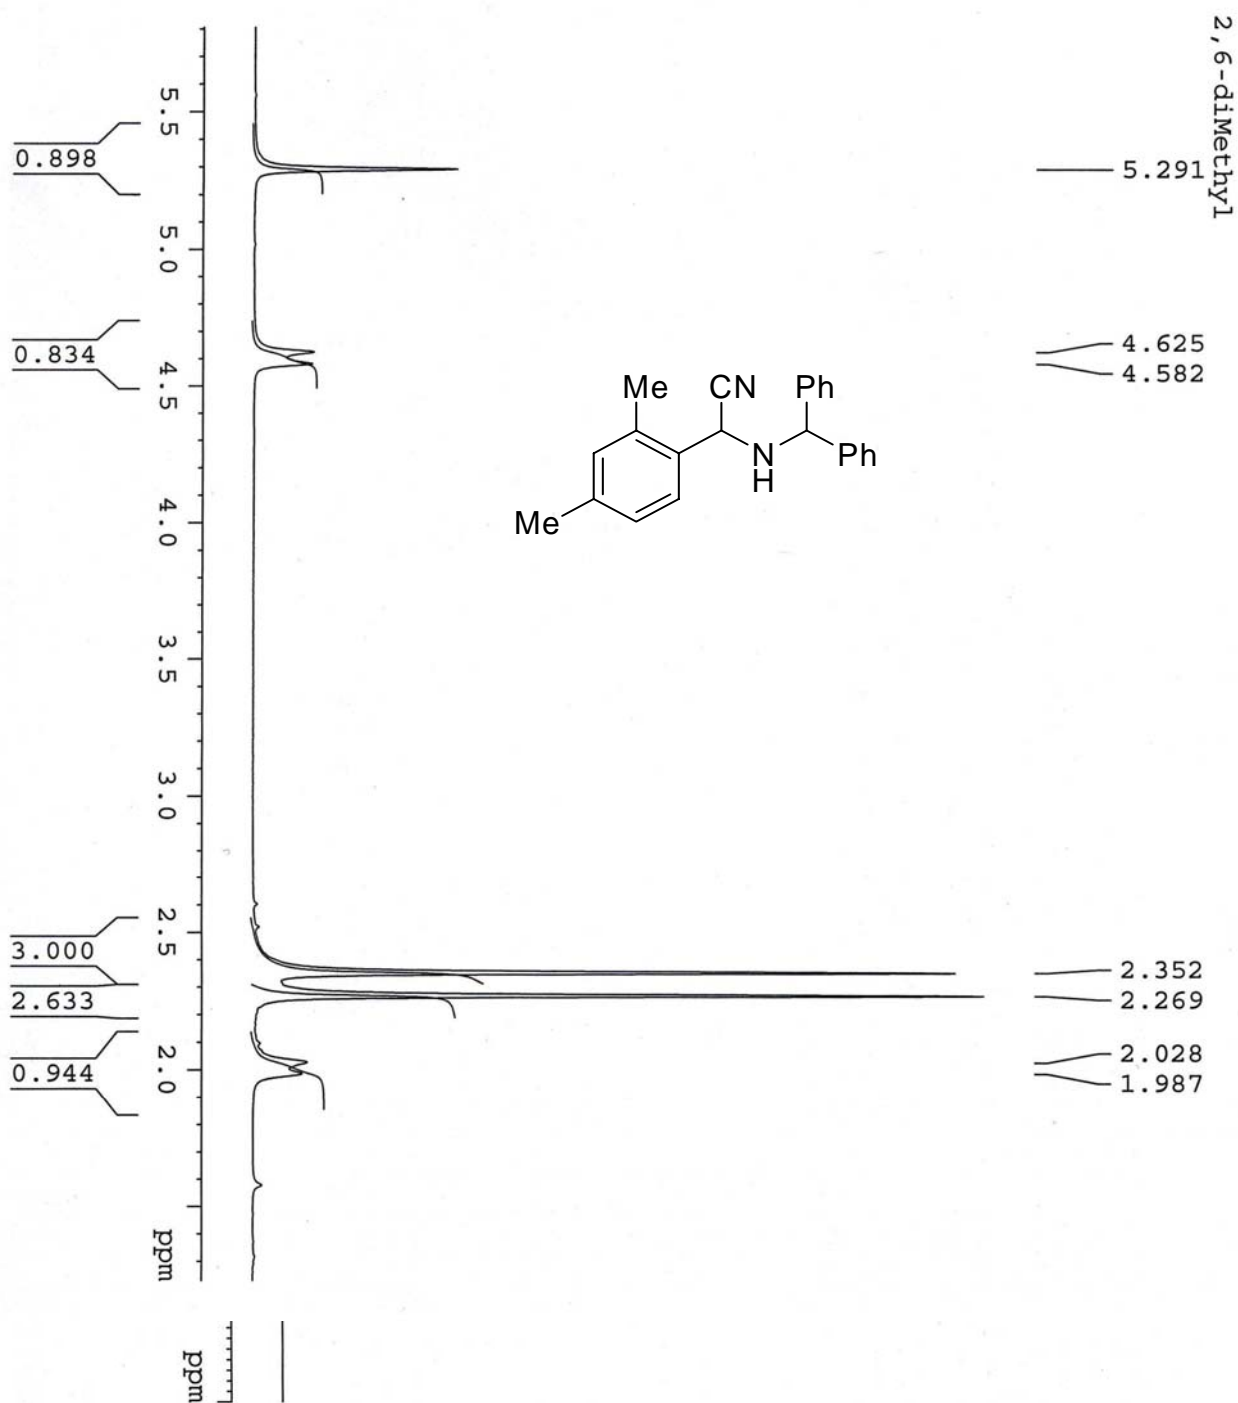



Table 2, entry 13

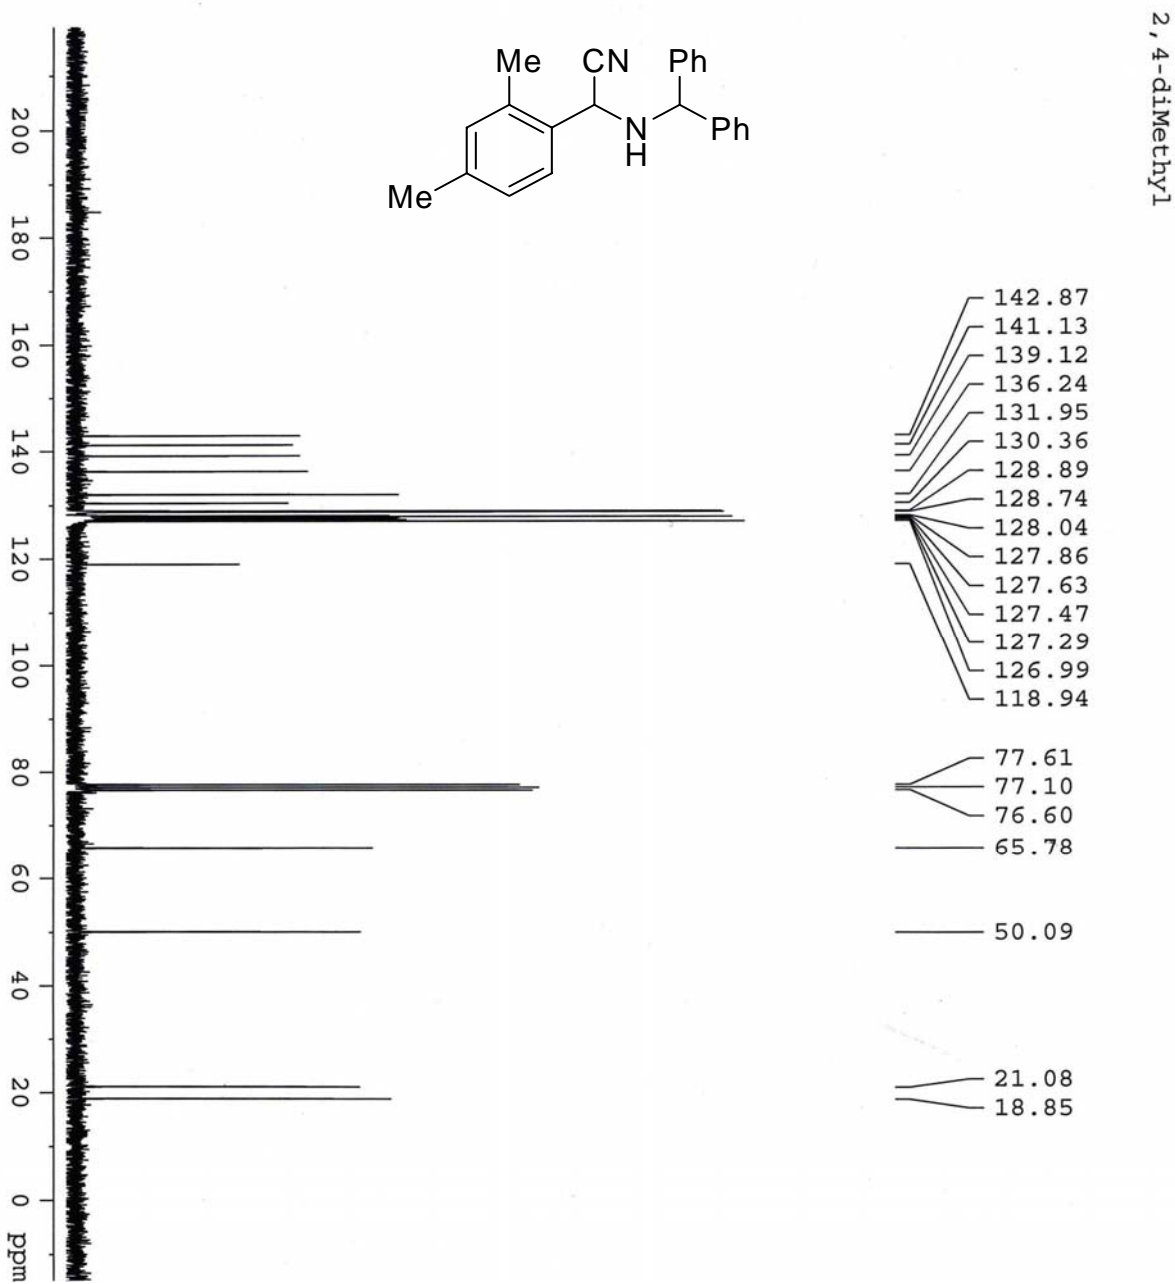

**Table 2, entry 13**

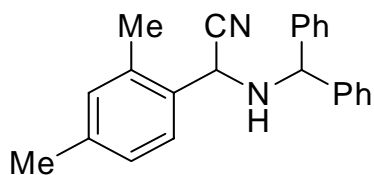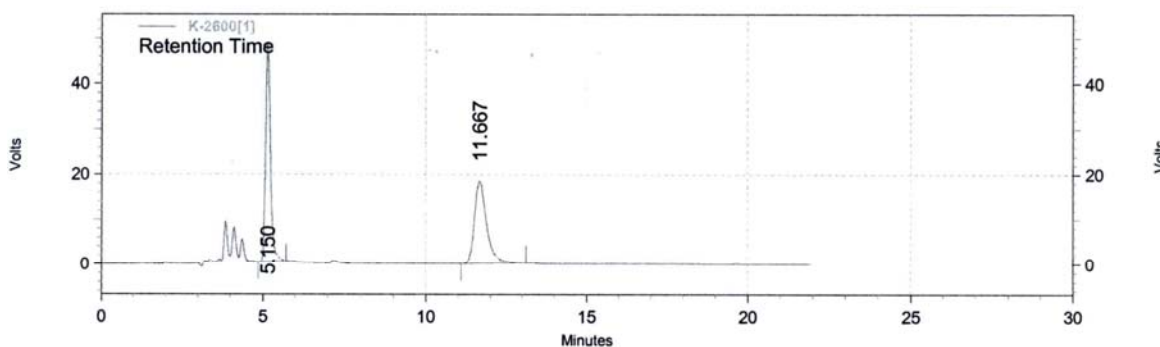

**K-2600[1] Results**

| Retention Time | Area   | Area % | Height | Height % |
|----------------|--------|--------|--------|----------|
| 5.150          | 481459 | 50.06  | 48589  | 72.53    |
| 11.667         | 480305 | 49.94  | 18403  | 27.47    |

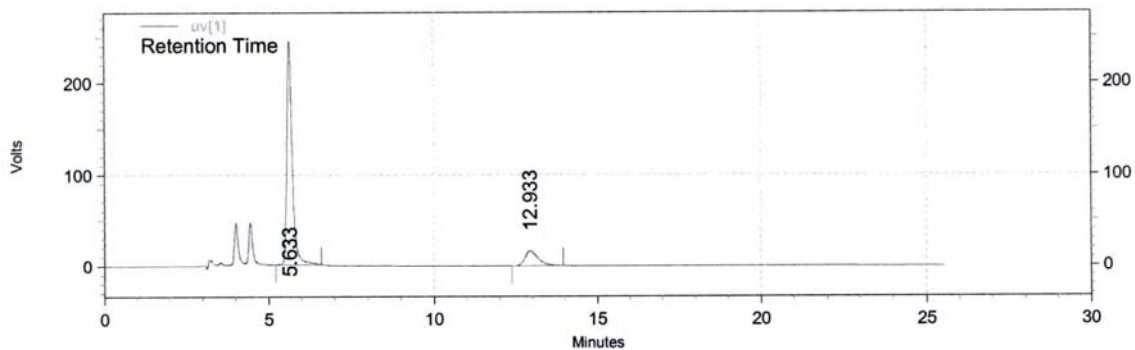

**uv[1] Results**

| Retention Time | Area    | Area % | Height | Height % |
|----------------|---------|--------|--------|----------|
| 5.633          | 2768516 | 86.04  | 244005 | 93.78    |
| 12.933         | 449065  | 13.96  | 16195  | 6.22     |

**Table 2, entry 13**

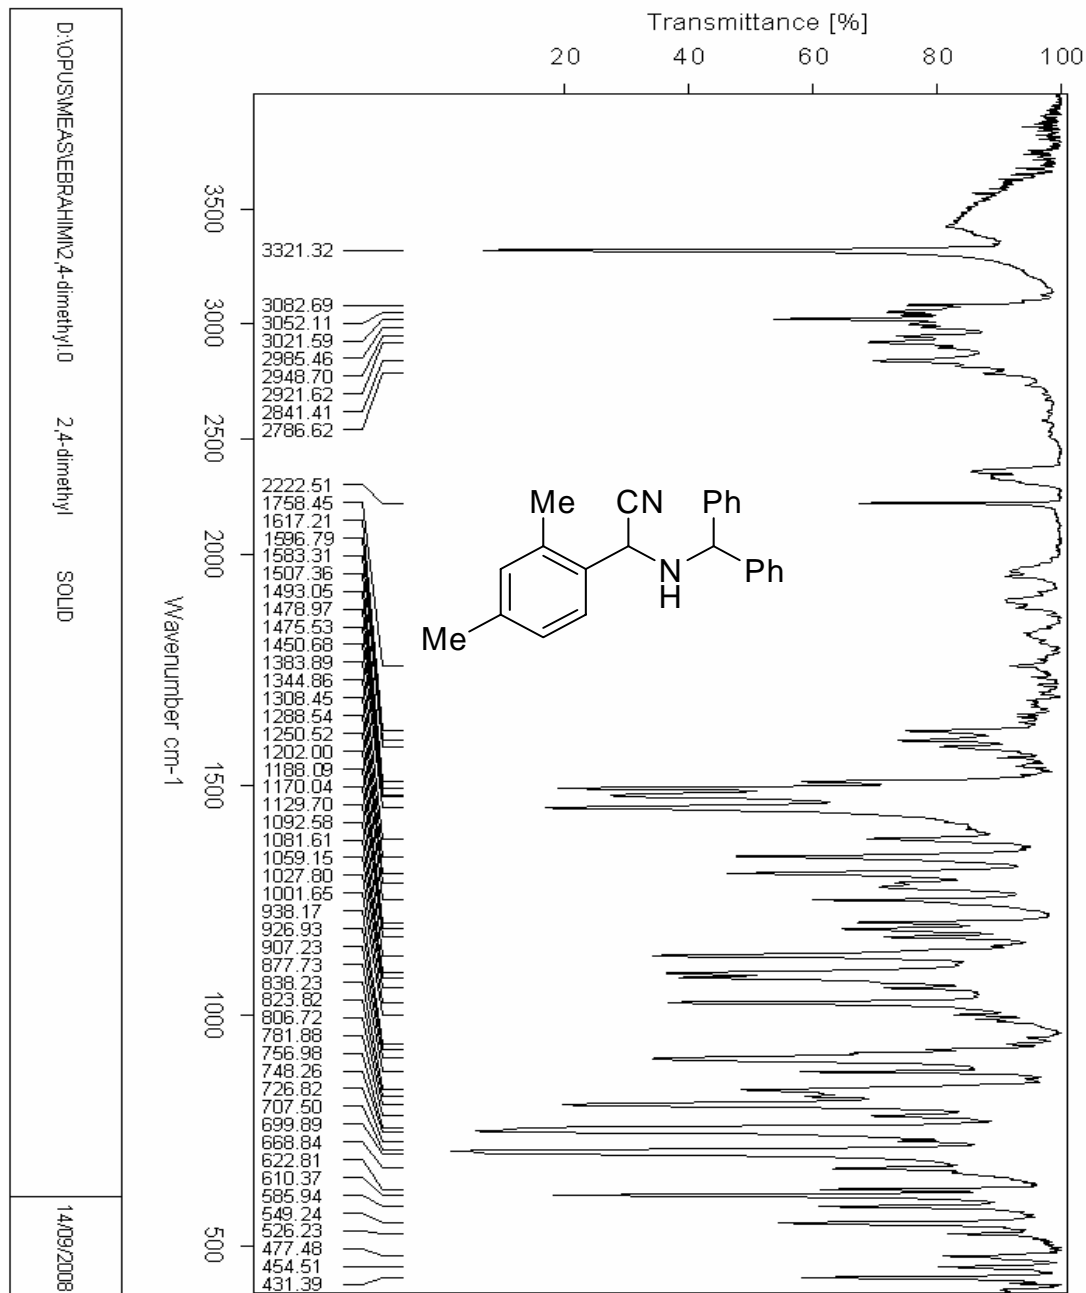

Table 2, entry 14

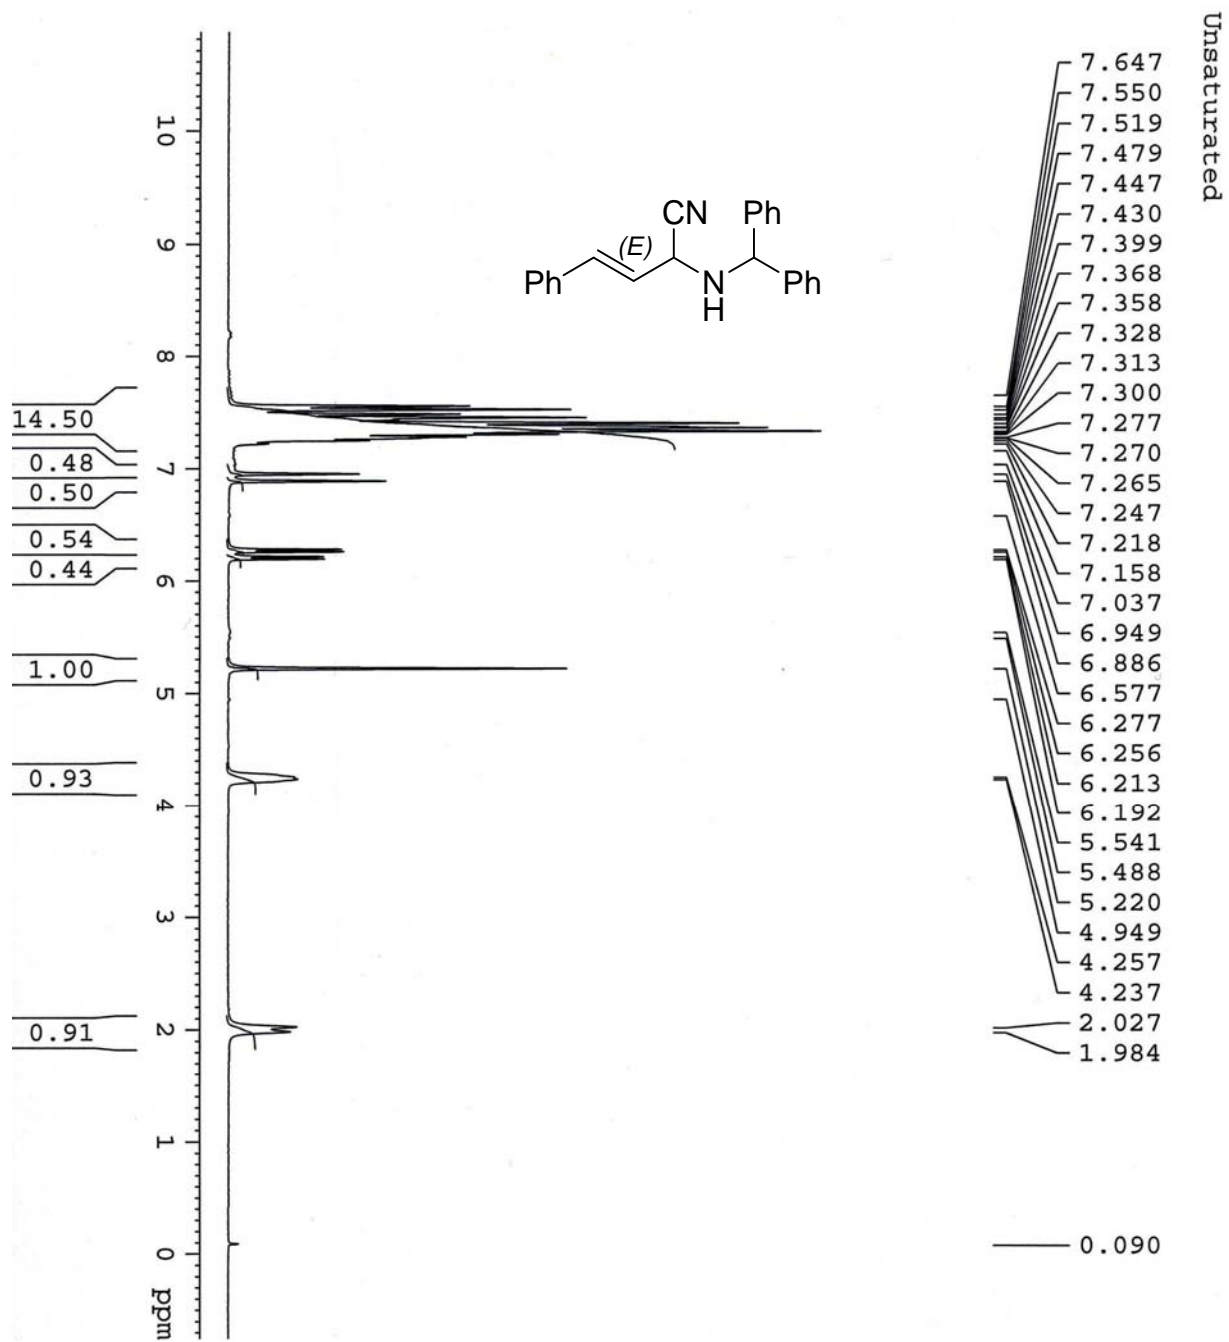

Table 2, entry 14

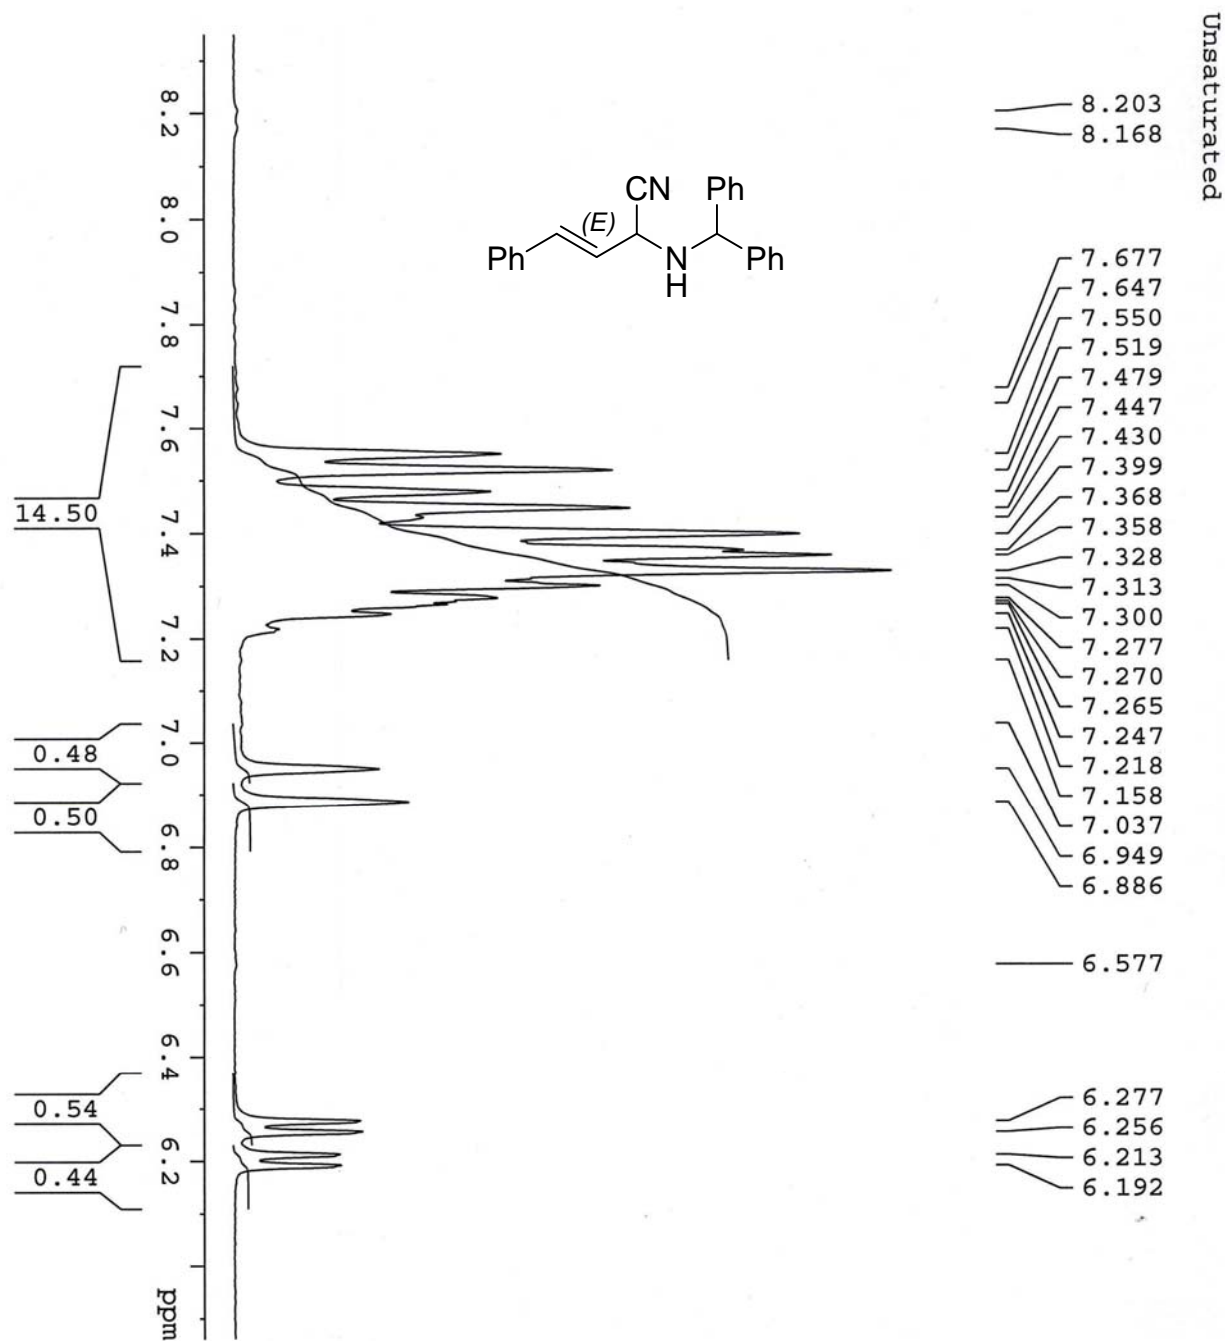

Table2, entry 14

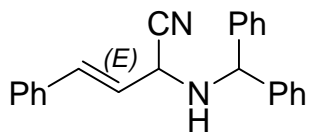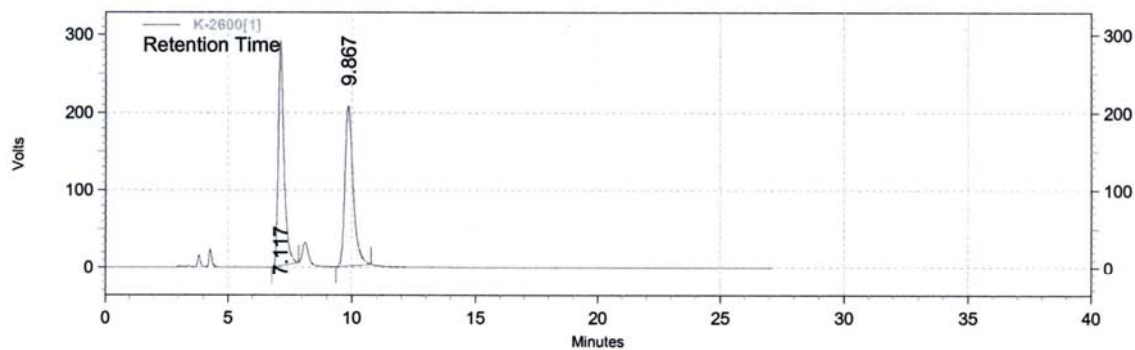

**K-2600[1] Results**

| Retention Time | Area    | Area % | Height | Height % |
|----------------|---------|--------|--------|----------|
| 7.117          | 4657745 | 49.29  | 289974 | 58.39    |
| 9.867          | 4791434 | 50.71  | 206662 | 41.61    |

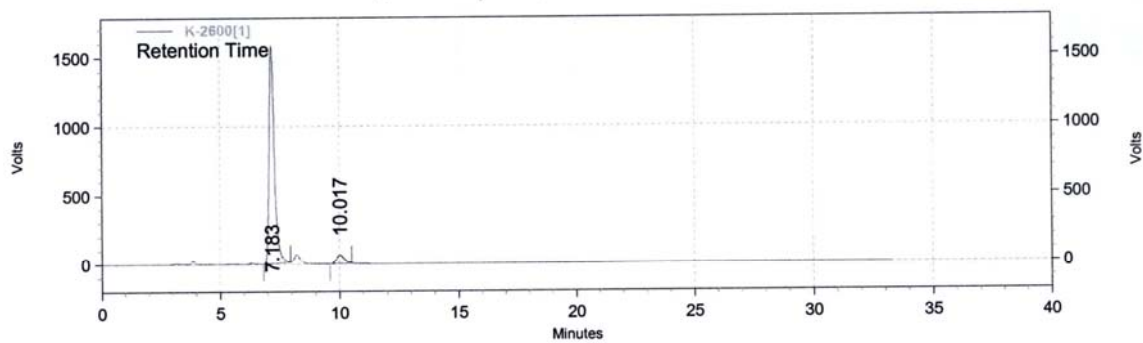

**K-2600[1] Results**

| Retention Time | Area     | Area % | Height  | Height % |
|----------------|----------|--------|---------|----------|
| 7.183          | 23940527 | 94.89  | 1578720 | 96.37    |
| 10.017         | 1290172  | 5.11   | 59427   | 3.63     |

**Table2, entry 14**

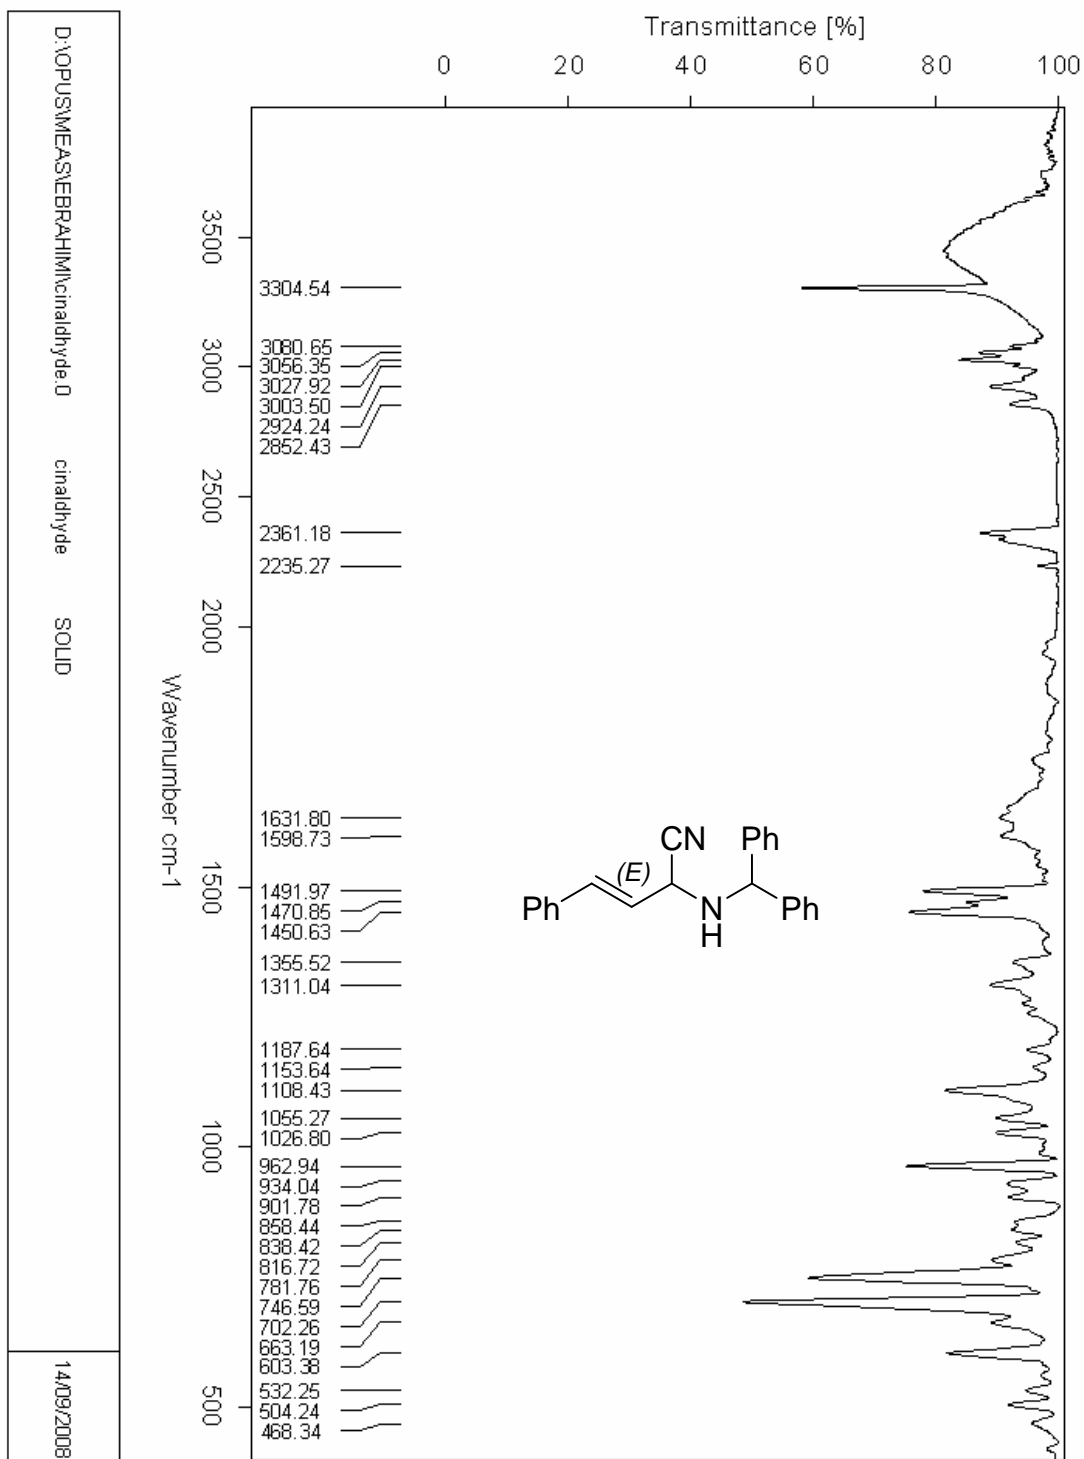

Table 2, entry 15

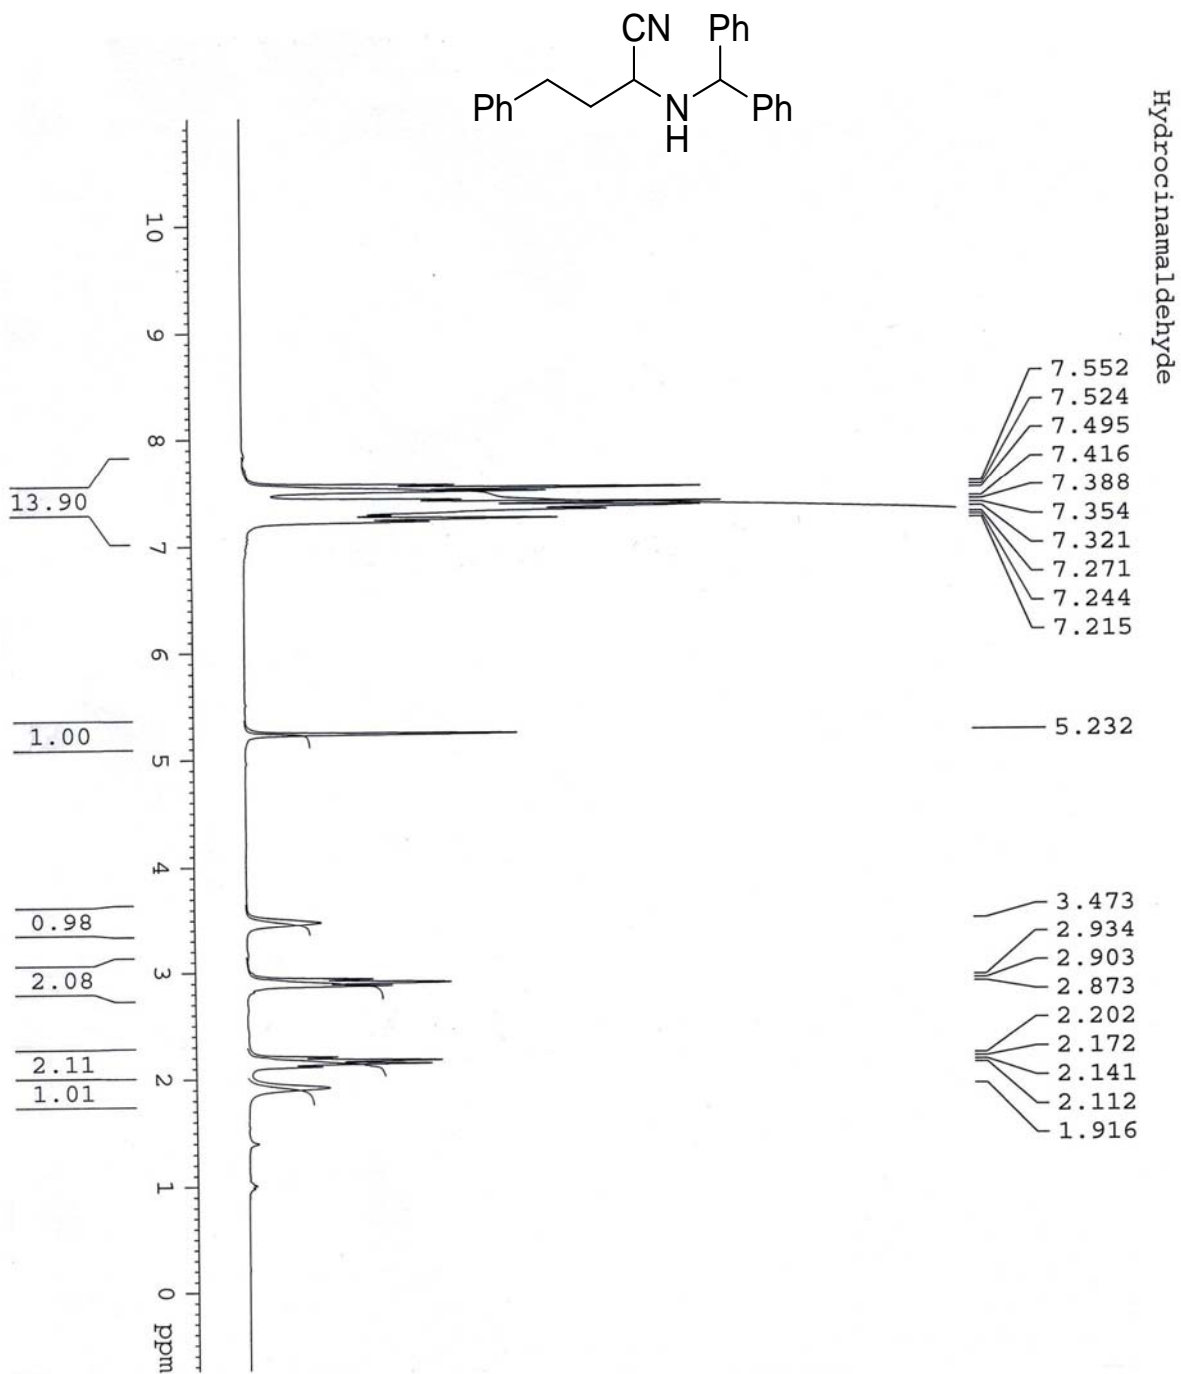



Table 2, entry 15

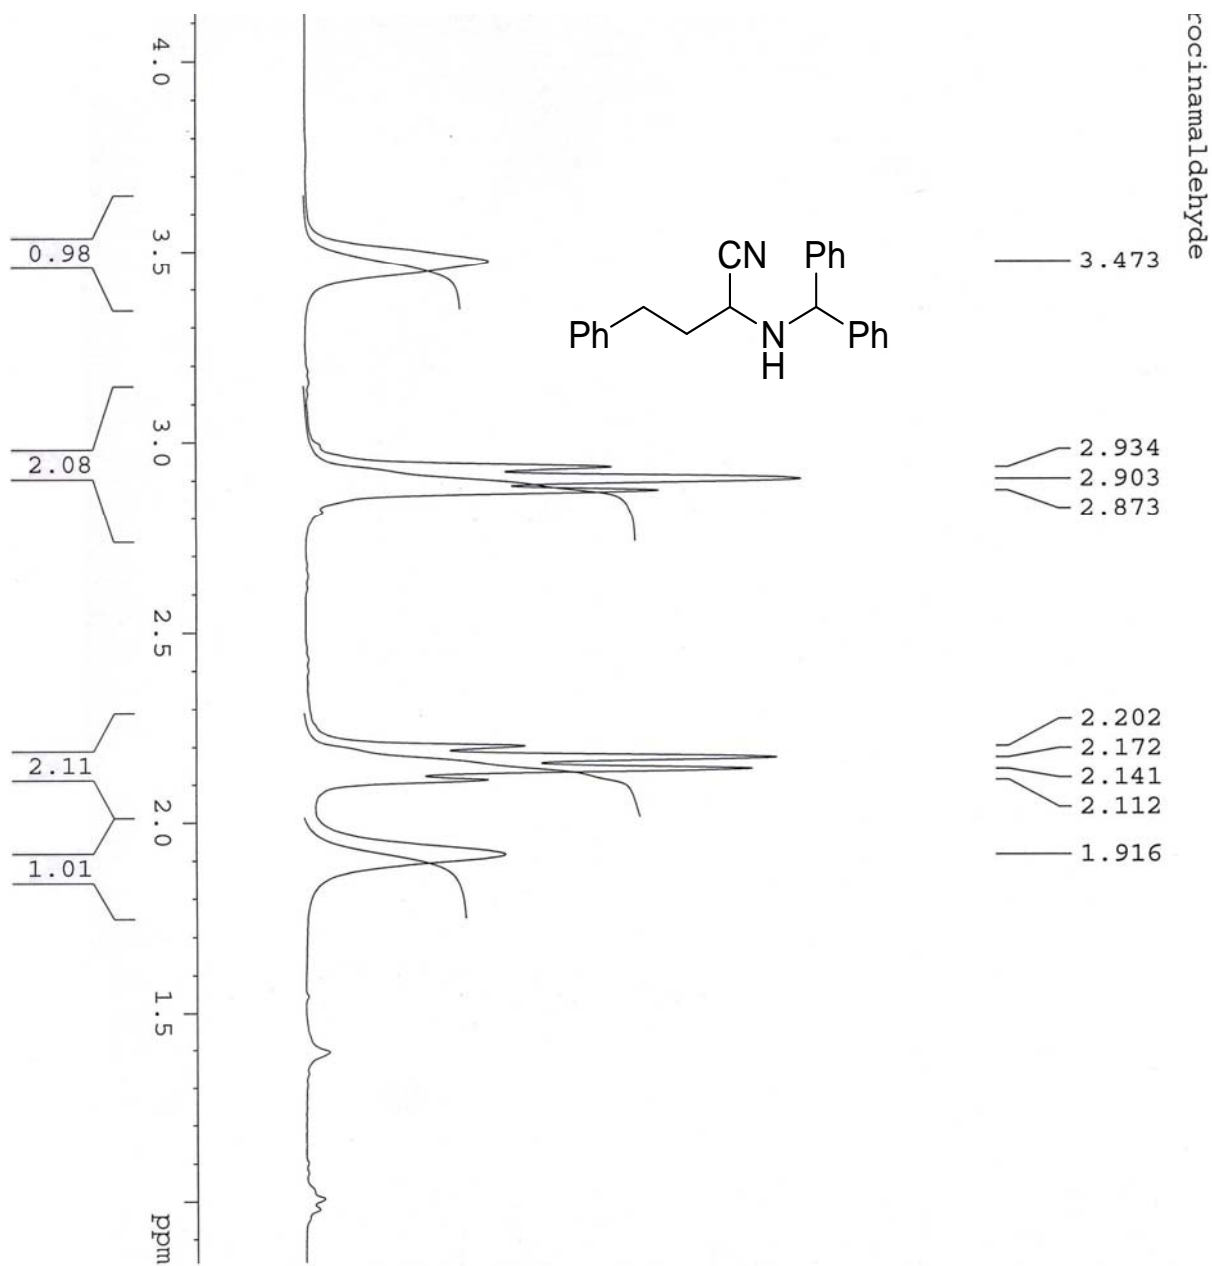

Table 2, entry 15

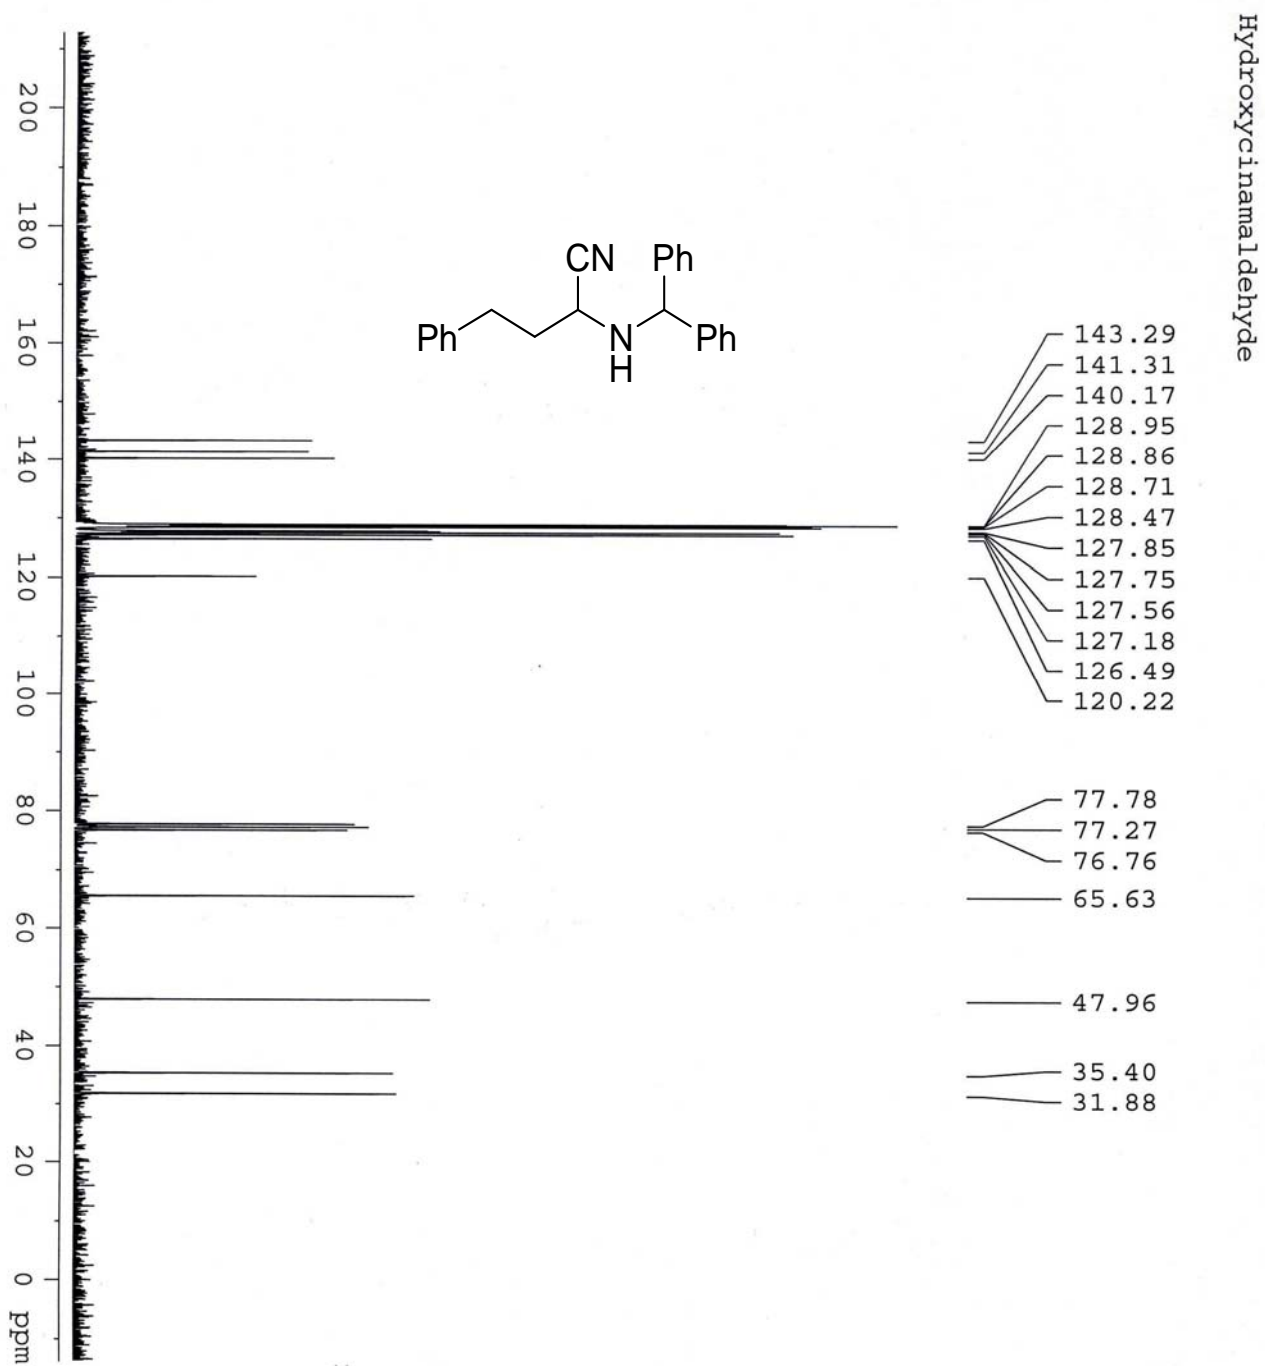

Table 2, entry 15

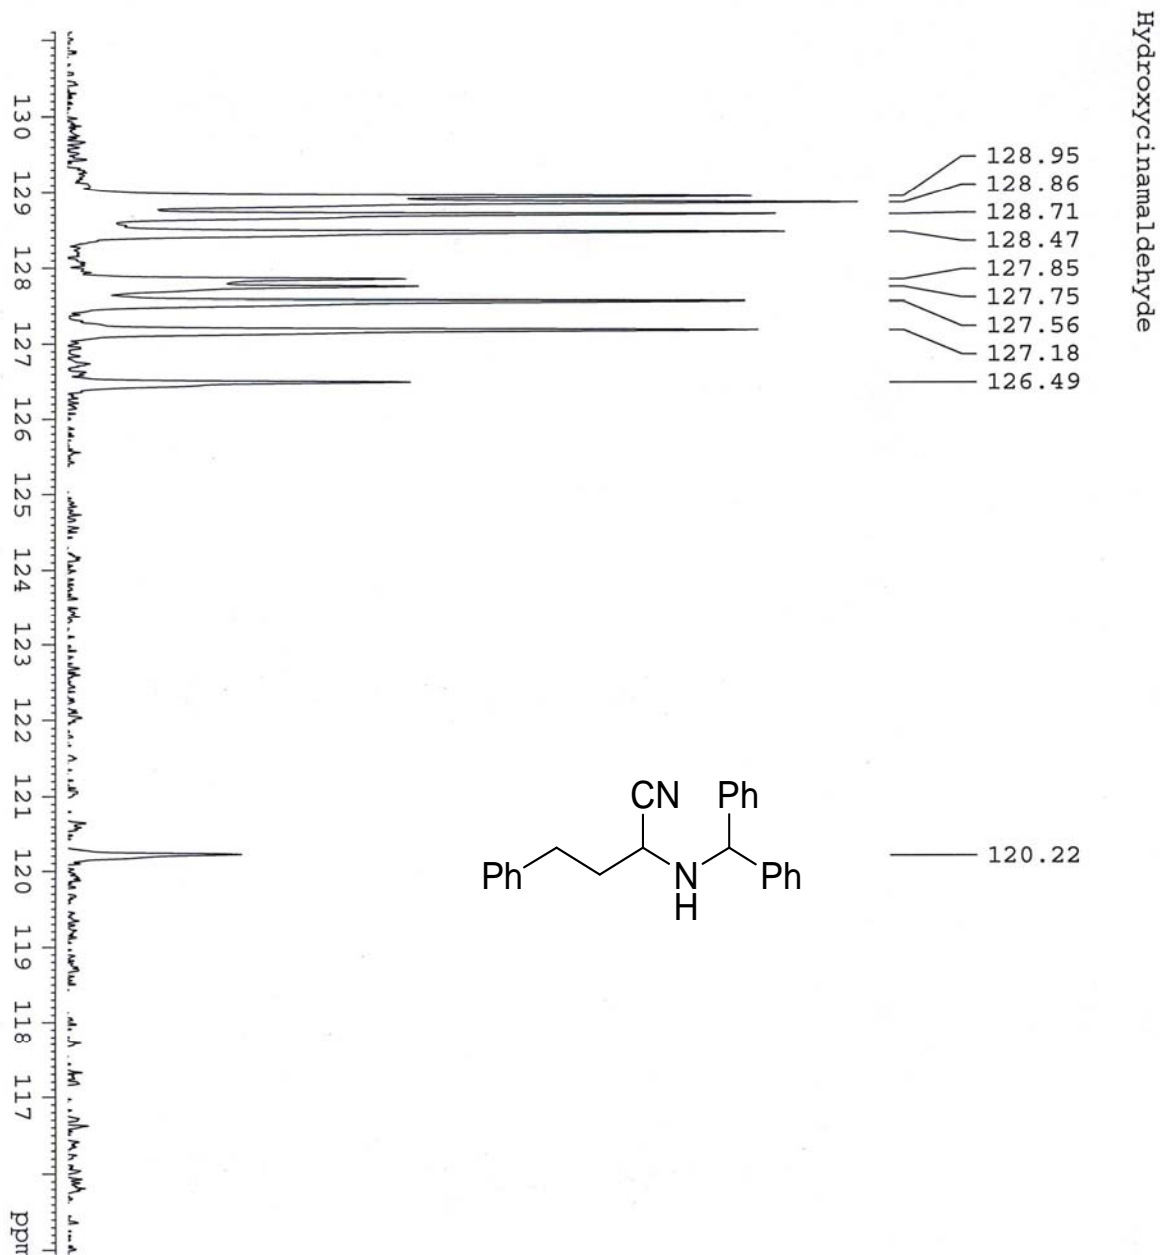

Table 2, entry 15

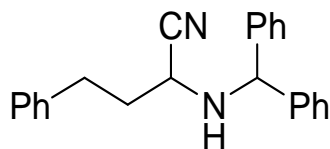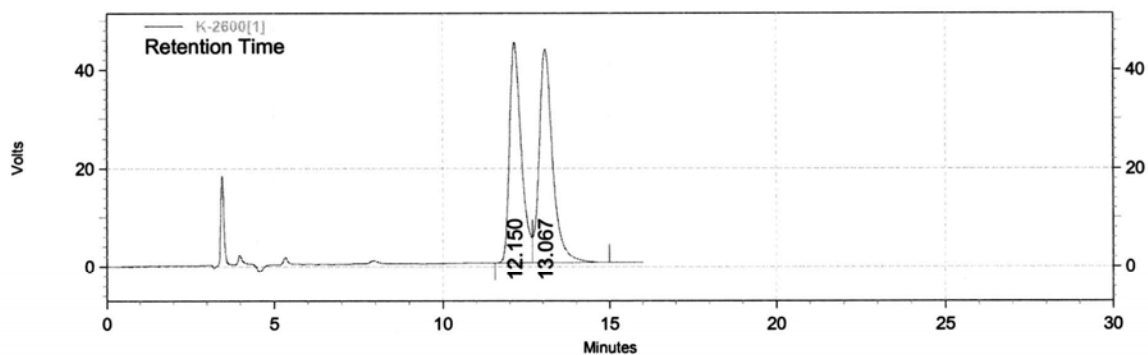

**K-2600[1] Results**

| Retention Time | Area    | Area % | Height | Height % |
|----------------|---------|--------|--------|----------|
| 12.150         | 1096697 | 47.35  | 44898  | 50.86    |
| 13.067         | 1219420 | 52.65  | 43374  | 49.14    |

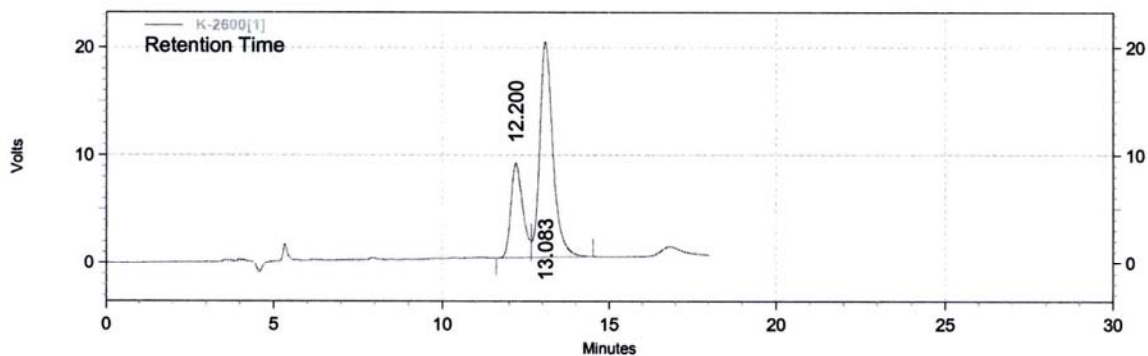

**K-2600[1] Results**

| Retention Time | Area   | Area % | Height | Height % |
|----------------|--------|--------|--------|----------|
| 12.200         | 216685 | 28.26  | 8771   | 30.43    |
| 13.083         | 550047 | 71.74  | 20053  | 69.57    |

**Table 2, entry 15**

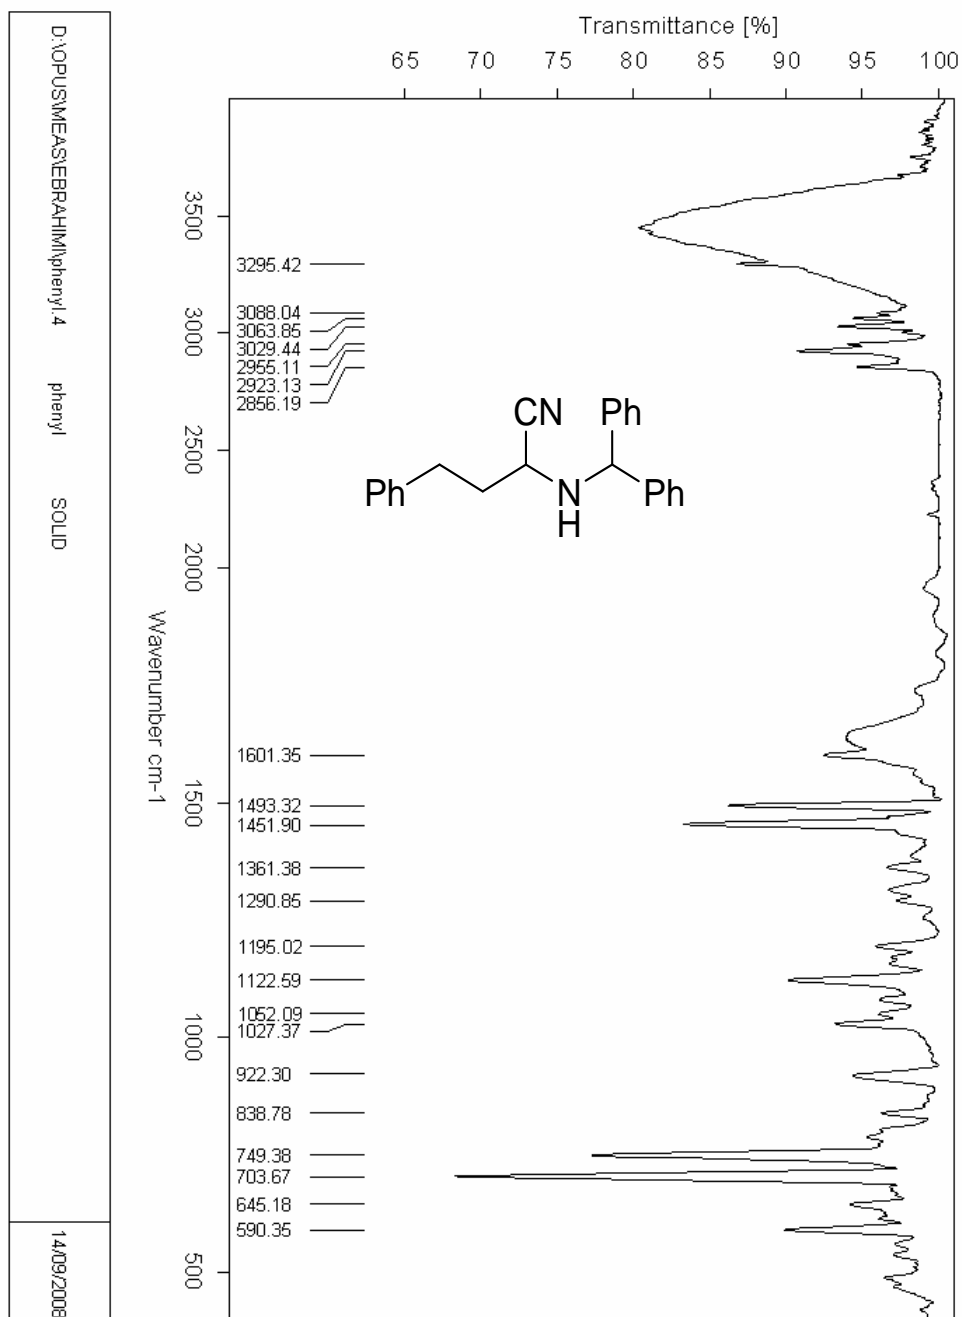

**Table 2, entry 16**

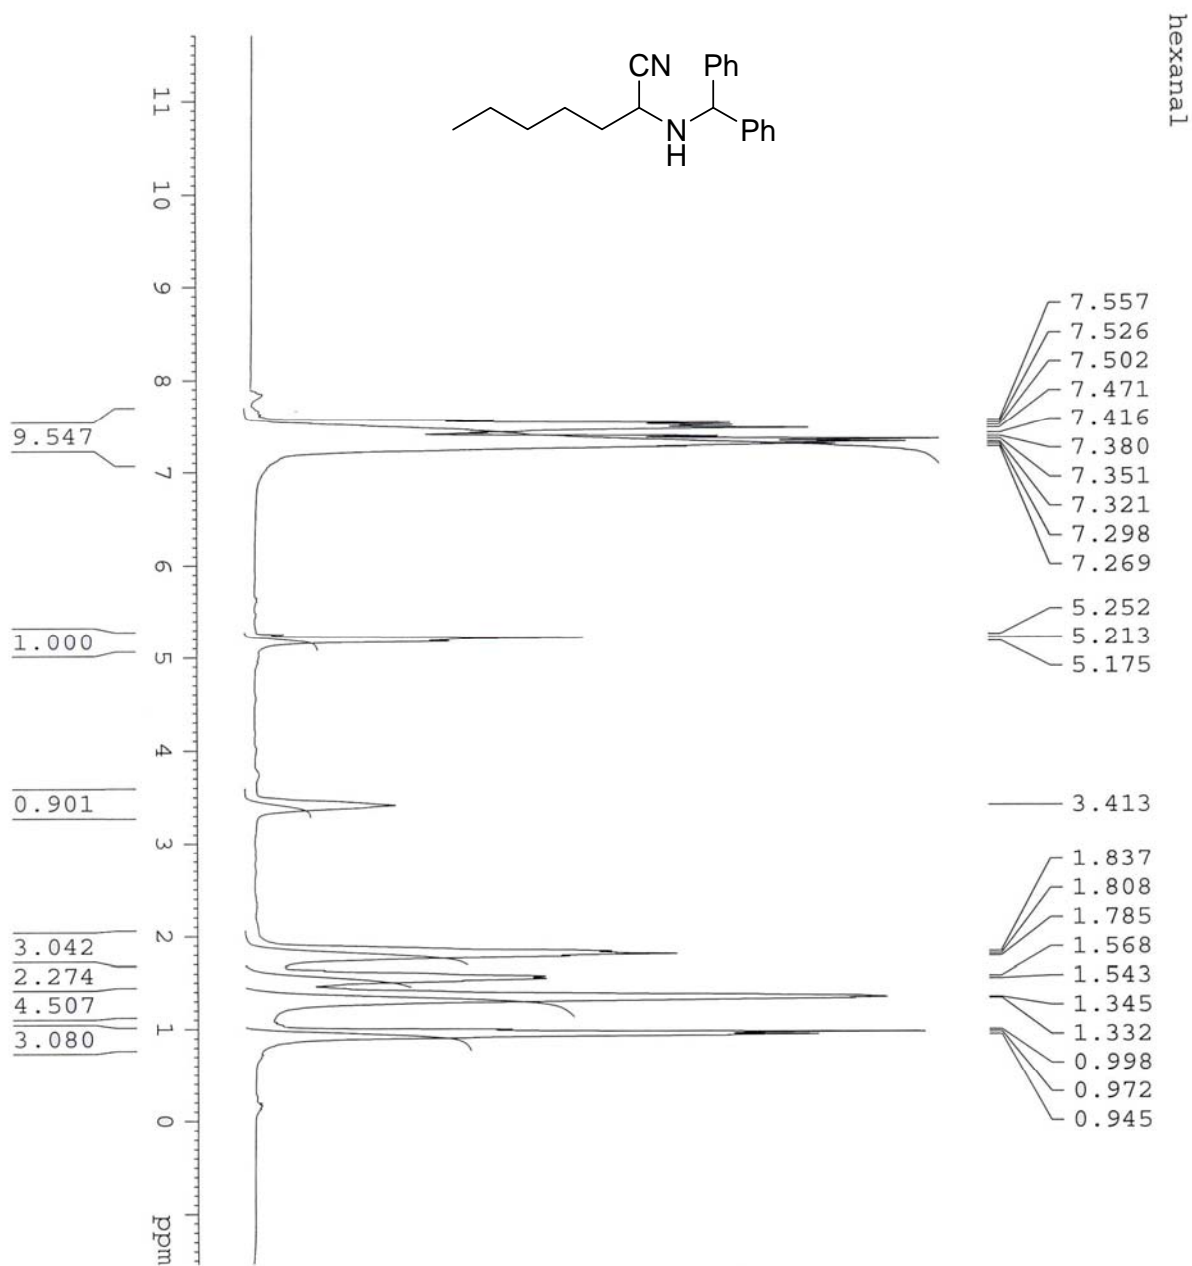

Table 2, entry 16

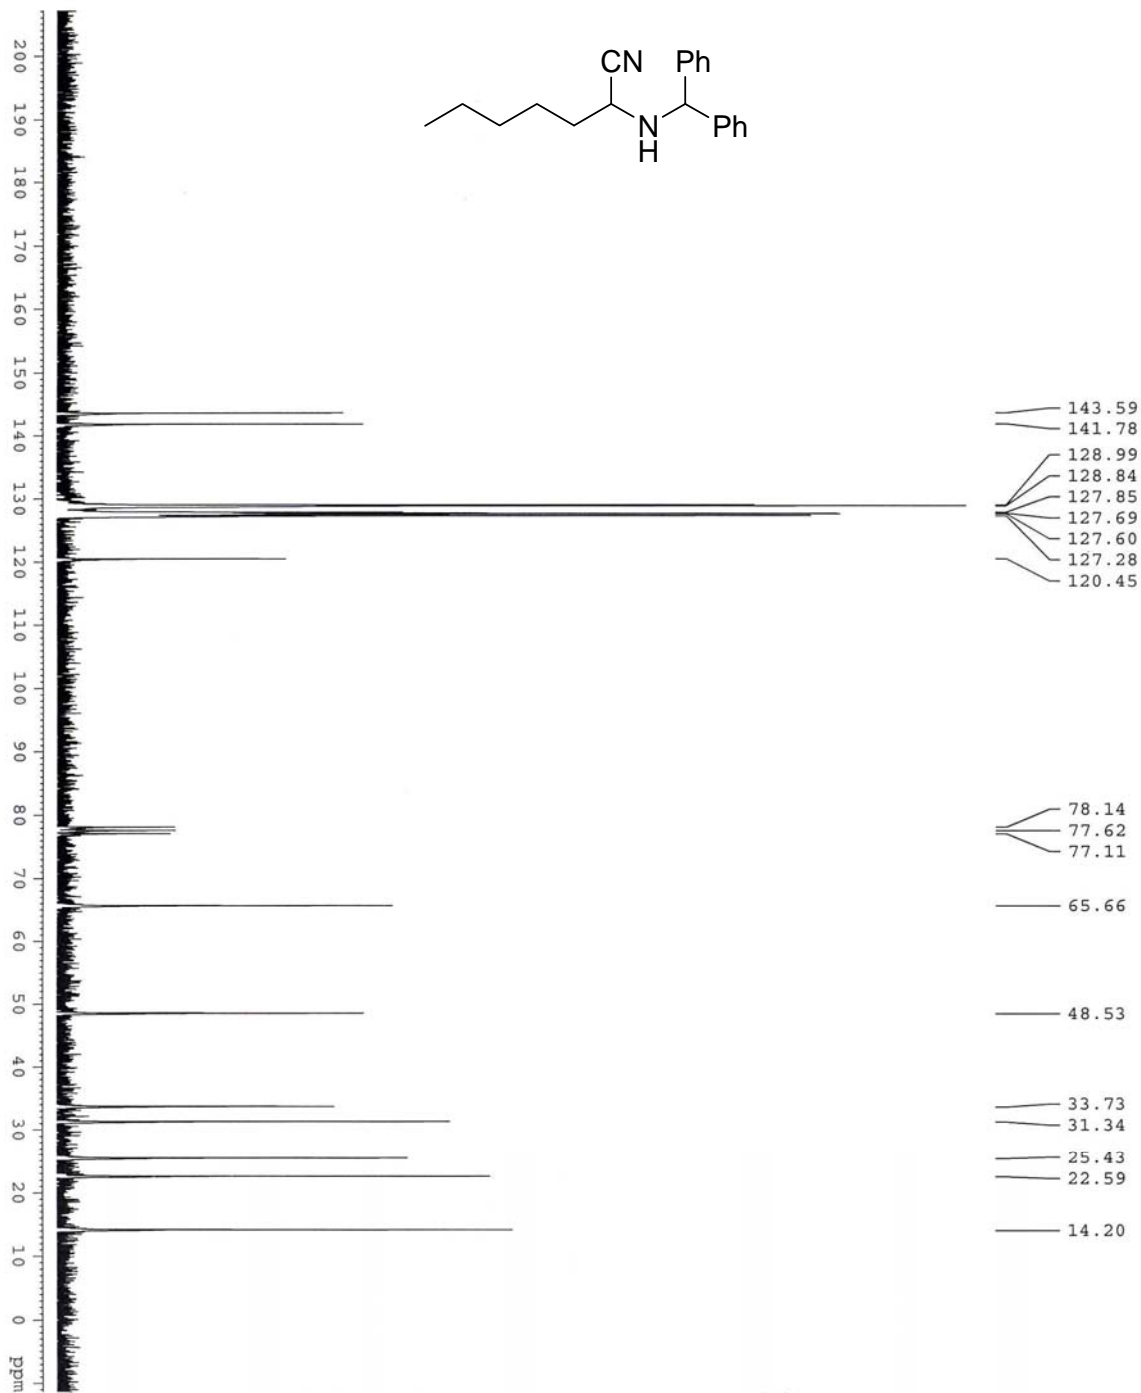

Table 2, entry 16

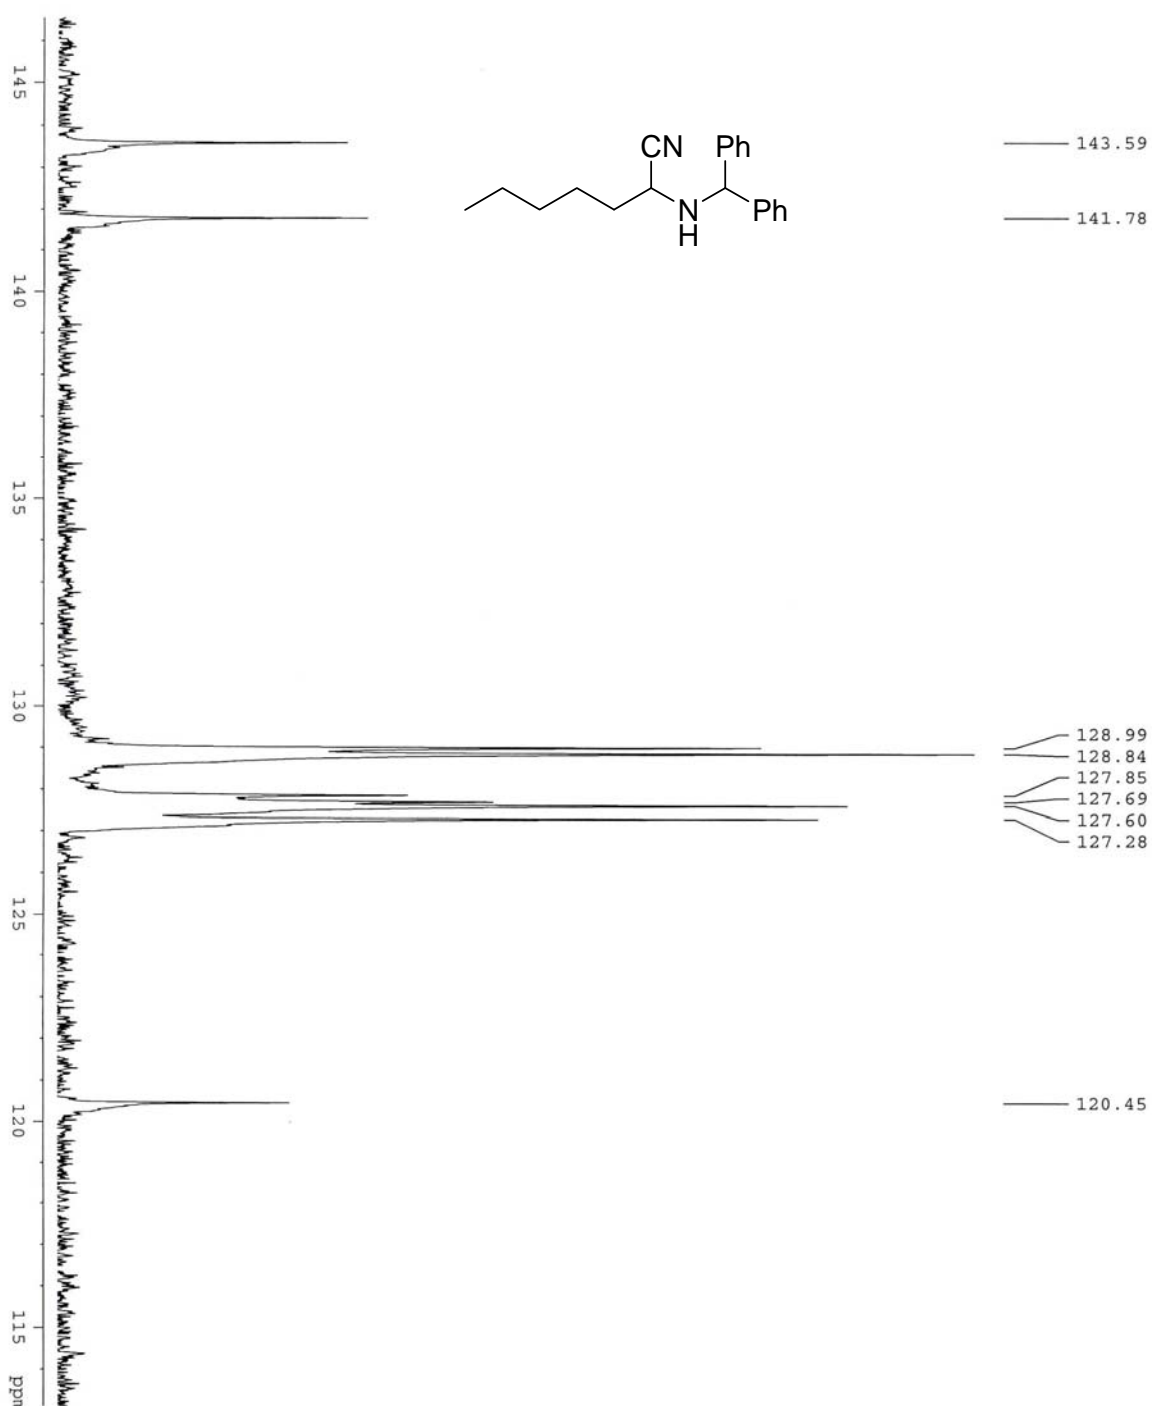

hexanal



Table 2, entry 16

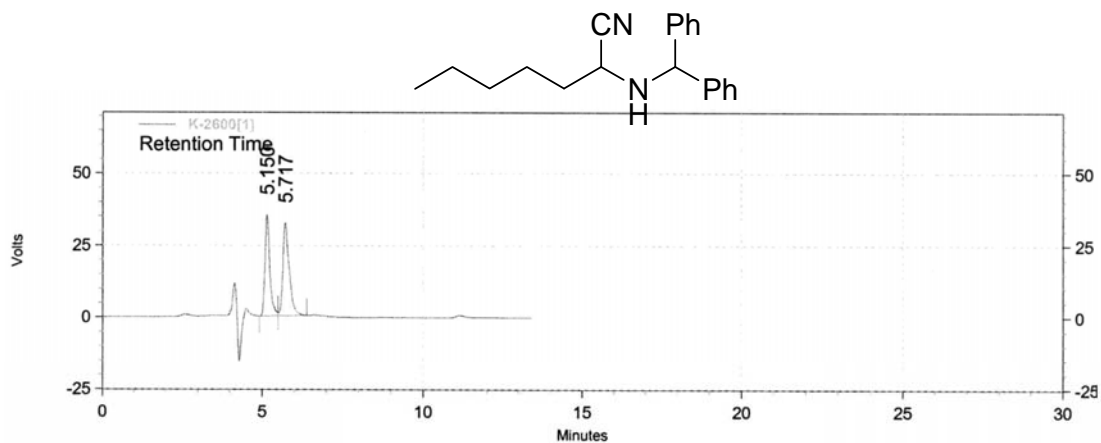

**K-2600[1] Results**

| Retention Time | Area   | Area % | Height | Height % |
|----------------|--------|--------|--------|----------|
| 5.150          | 366141 | 49.38  | 35068  | 52.21    |
| 5.717          | 375335 | 50.62  | 32098  | 47.79    |

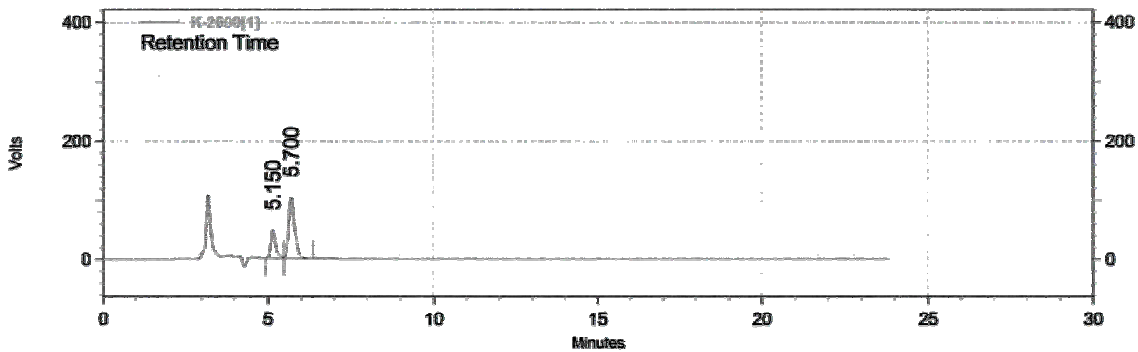

**K-2600[1] Results**

| Retention Time | Area    | Area % | Height | Height % |
|----------------|---------|--------|--------|----------|
| 5.150          | 495062  | 27.65  | 47255  | 31.34    |
| 5.700          | 1295078 | 72.35  | 103550 | 68.66    |

Table 2, entry 16

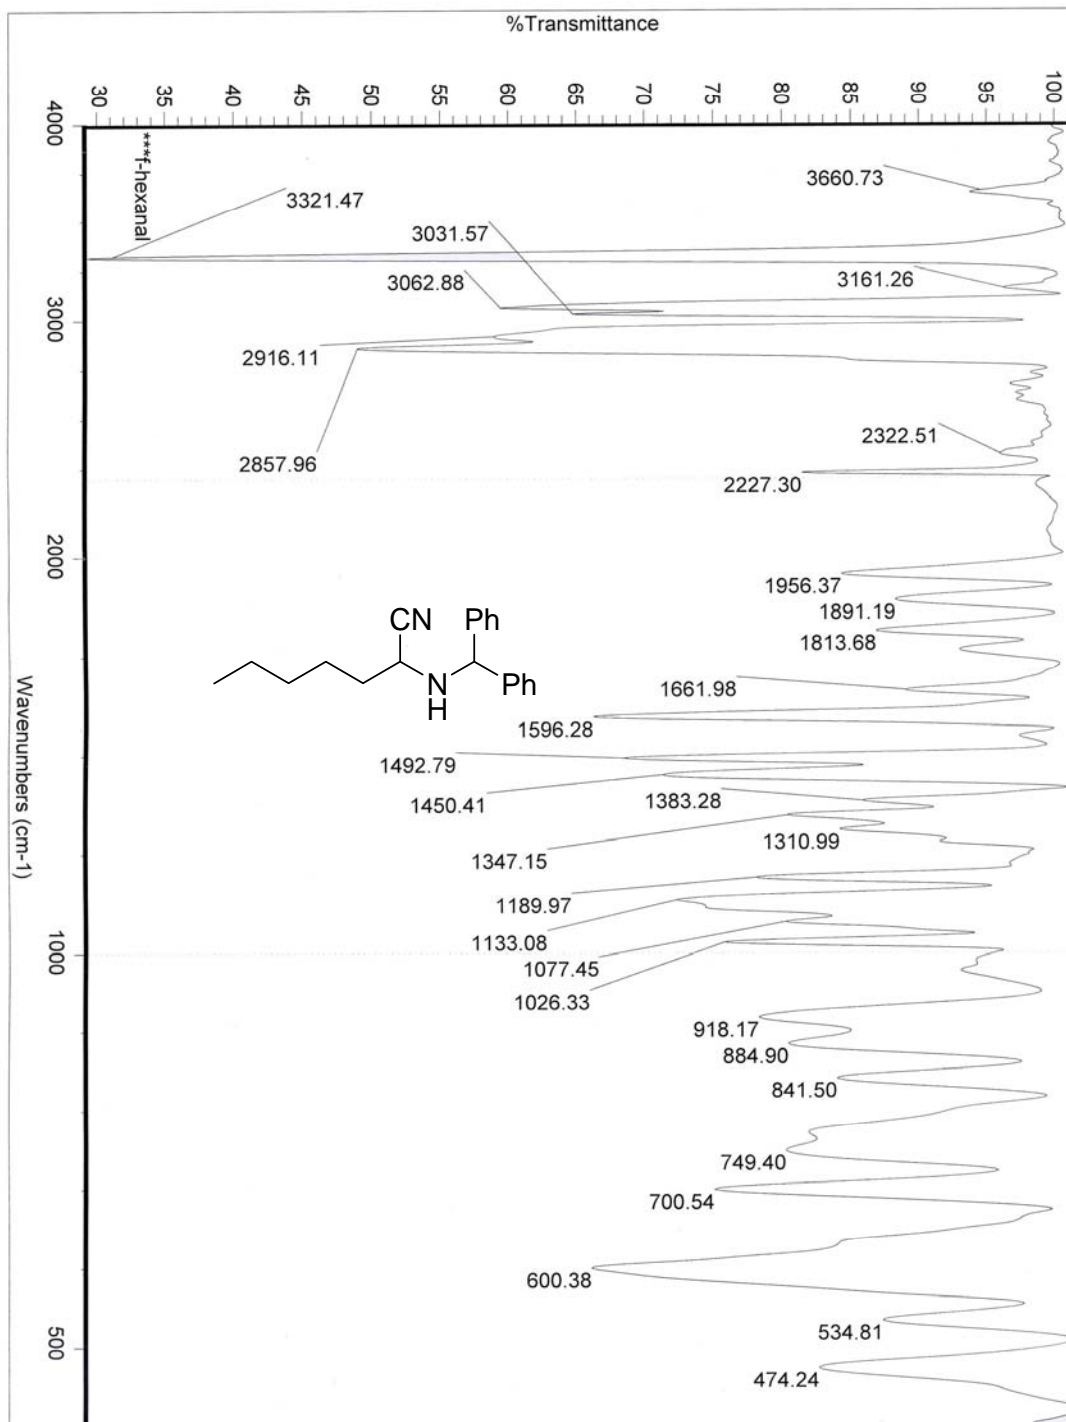

## HPLC Chromatograms for Catalytic Enantioselective Strecker Reaction Using $yb(OTf)_3$ -pybox system under Homogeneous Conditions at $-50\text{ }^\circ\text{C}$

Table 2, entry 17

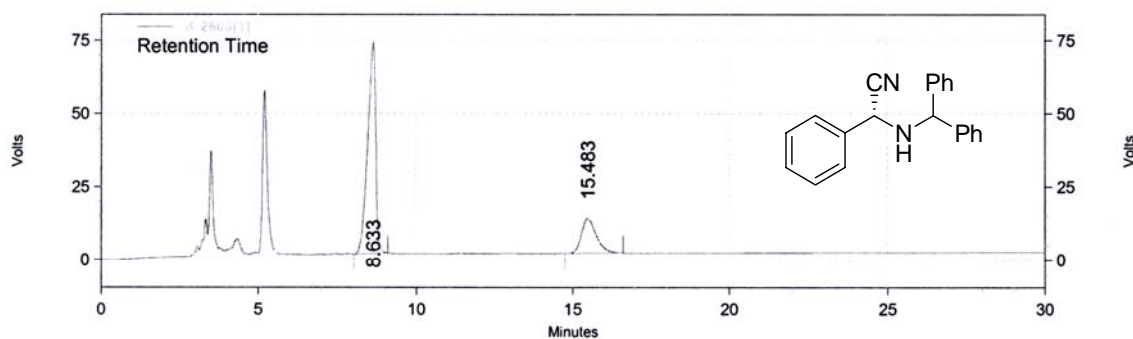

### K-2600[1] Results

| Retention Time | Area    | Area % | Height | Height % |
|----------------|---------|--------|--------|----------|
| 8.633          | 1274549 | 76.58  | 72270  | 85.93    |
| 15.483         | 389798  | 23.42  | 11829  | 14.07    |

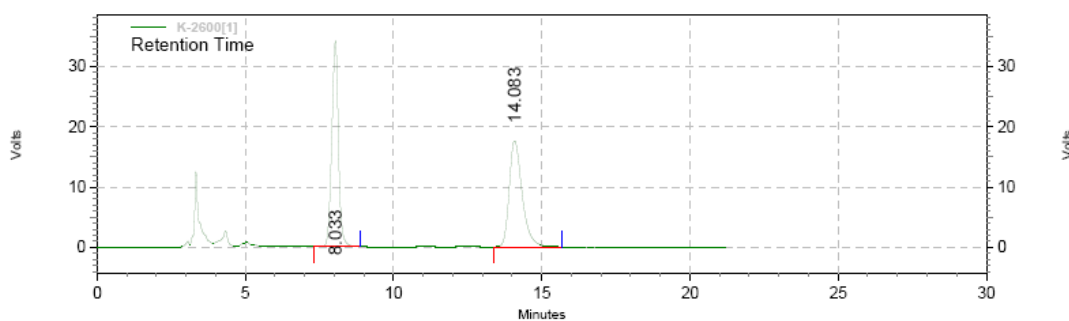

### K-2600[1] Results

| Retention Time | Area   | Area % | Height | Height % |
|----------------|--------|--------|--------|----------|
| 8.033          | 530333 | 49.79  | 34090  | 65.95    |
| 14.083         | 534790 | 50.21  | 17597  | 34.05    |

### Table 2, Entry 18

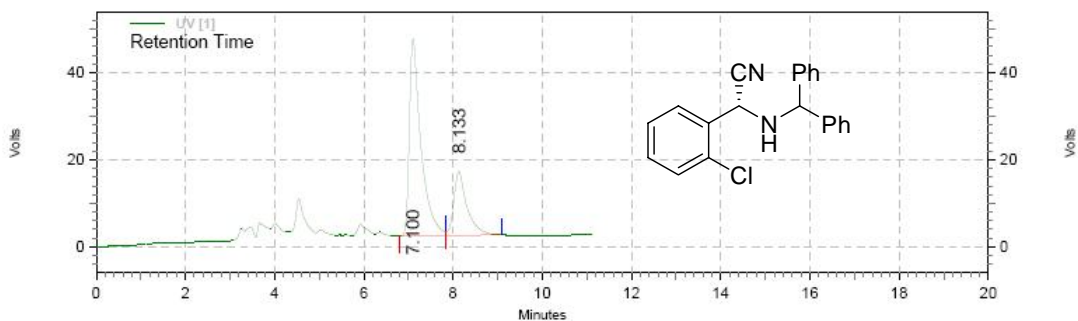

#### UV [1] Results

| Retention Time | Area   | Area % | Height | Height % |
|----------------|--------|--------|--------|----------|
| 7.100          | 816799 | 73.10  | 45340  | 75.59    |
| 8.133          | 300535 | 26.90  | 14638  | 24.41    |

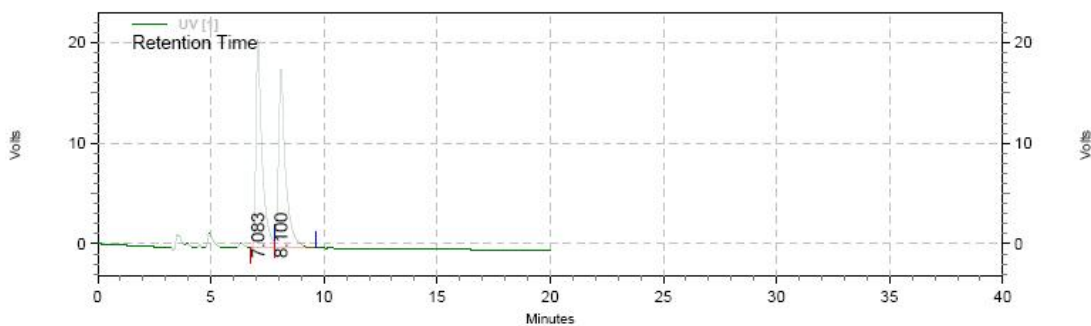

#### UV [1] Results

| Retention Time | Area   | Area % | Height | Height % |
|----------------|--------|--------|--------|----------|
| 7.083          | 378151 | 49.71  | 20675  | 53.80    |
| 8.100          | 382634 | 50.29  | 17753  | 46.20    |

**Table 2, Entry 19**

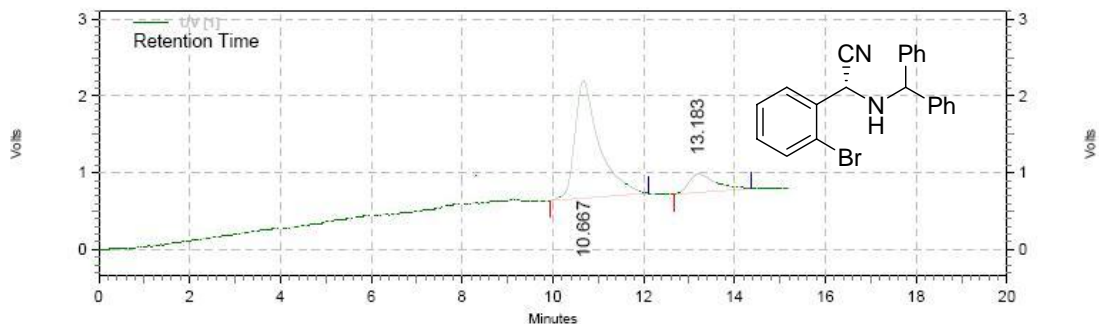

**UV [1] Results**

| Retention Time | Area  | Area % | Height | Height % |
|----------------|-------|--------|--------|----------|
| 10.667         | 56920 | 85.31  | 1529   | 86.19    |
| 13.183         | 9800  | 14.69  | 245    | 13.81    |

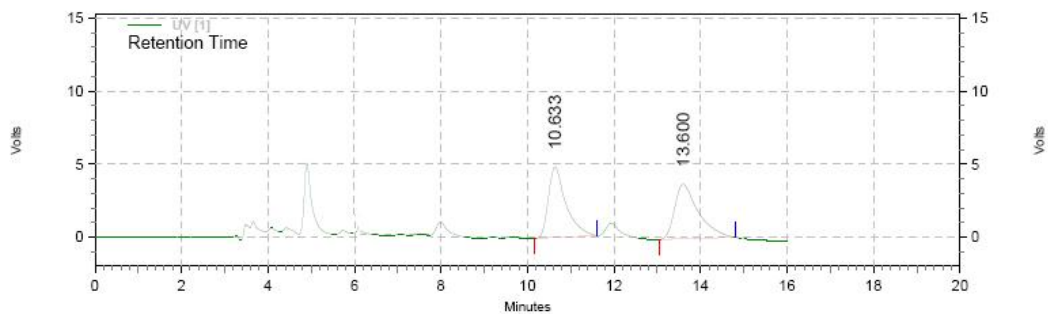

**UV [1] Results**

| Retention Time | Area   | Area % | Height | Height % |
|----------------|--------|--------|--------|----------|
| 10.633         | 136975 | 49.14  | 4848   | 56.50    |
| 13.600         | 141747 | 50.86  | 3732   | 43.50    |

**Table 2, Entry 20**

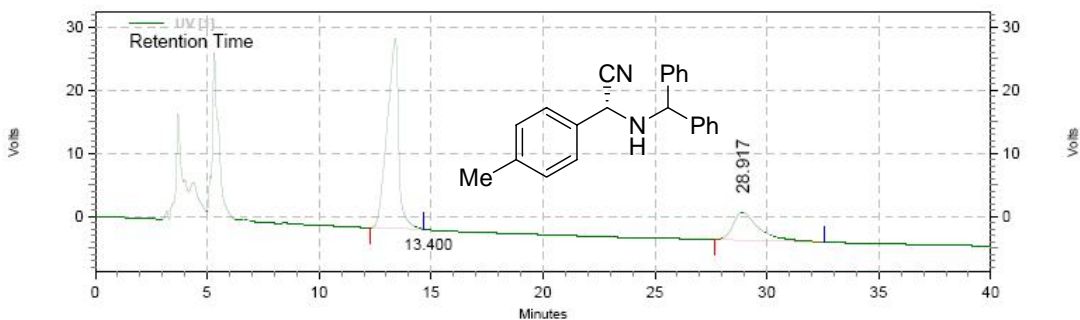

**UV [1] Results**

| Retention Time | Area    | Area % | Height | Height % |
|----------------|---------|--------|--------|----------|
| 13.400         | 1074147 | 75.26  | 30104  | 87.11    |
| 28.917         | 353174  | 24.74  | 4453   | 12.89    |

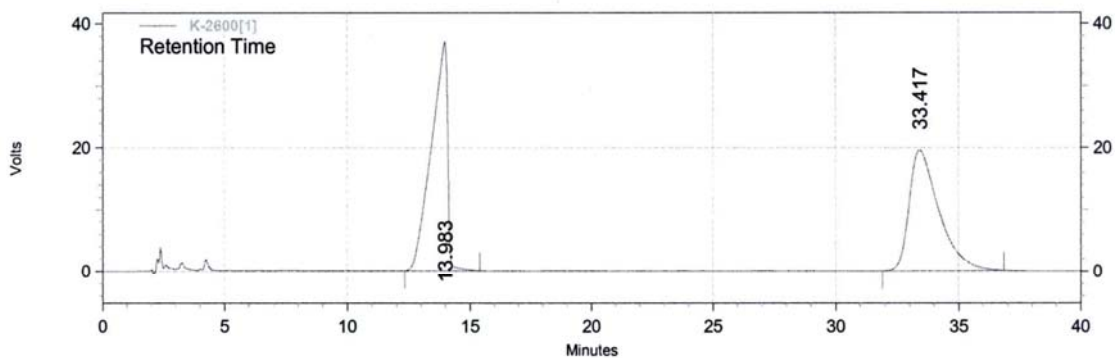

**K-2600[1] Results**

| Retention Time | Area    | Area % | Height | Height % |
|----------------|---------|--------|--------|----------|
| 13.983         | 1648095 | 50.18  | 36935  | 65.51    |
| 33.417         | 1636272 | 49.82  | 19443  | 34.49    |

### Table 2, Entry 21

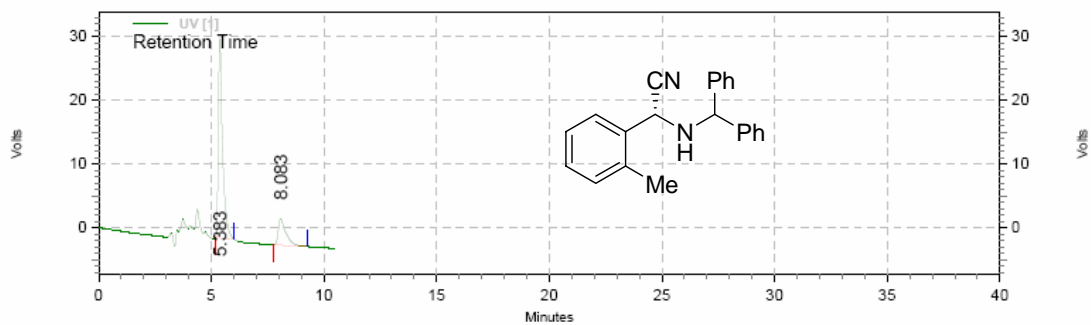

#### UV [1] Results

| Retention Time | Area   | Area % | Height | Height % |
|----------------|--------|--------|--------|----------|
| 5.383          | 402930 | 80.62  | 31209  | 88.18    |
| 8.083          | 96887  | 19.38  | 4183   | 11.82    |

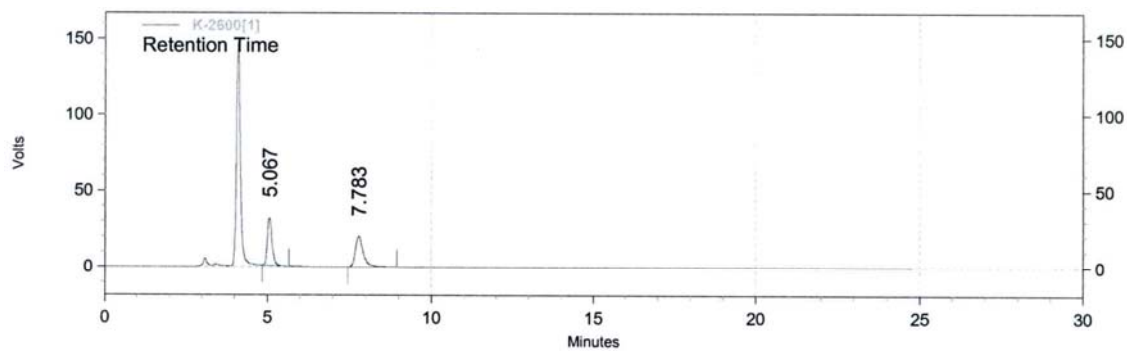

#### K-2600[1] Results

| Retention Time | Area   | Area % | Height | Height % |
|----------------|--------|--------|--------|----------|
| 5.067          | 308844 | 49.20  | 31368  | 61.06    |
| 7.783          | 318885 | 50.80  | 20008  | 38.94    |

**Table 2, entry 22**

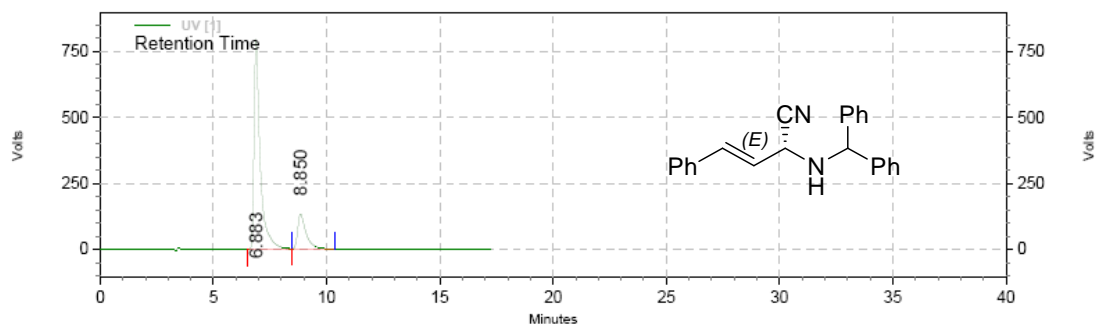

**UV [1] Results**

| Retention Time | Area     | Area % | Height | Height % |
|----------------|----------|--------|--------|----------|
| 6.883          | 15086873 | 81.14  | 794568 | 85.60    |
| 8.850          | 3506026  | 18.86  | 133644 | 14.40    |

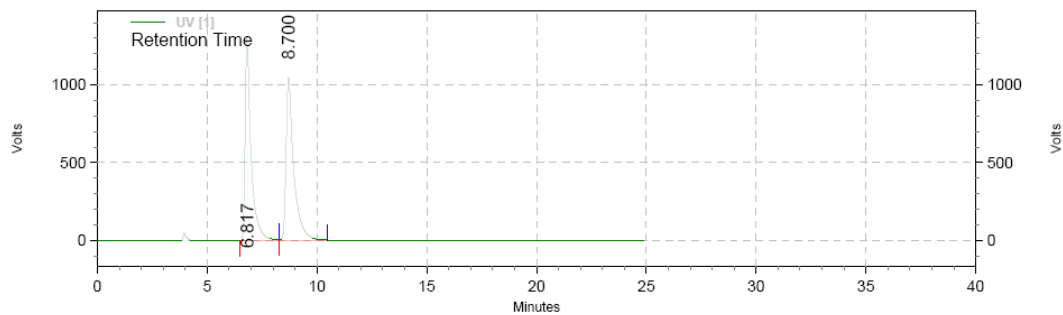

**UV [1] Results**

| Retention Time | Area     | Area % | Height  | Height % |
|----------------|----------|--------|---------|----------|
| 6.817          | 24454699 | 49.25  | 1308675 | 55.63    |
| 8.700          | 25202198 | 50.75  | 1043807 | 44.37    |



Table 2, entry 23

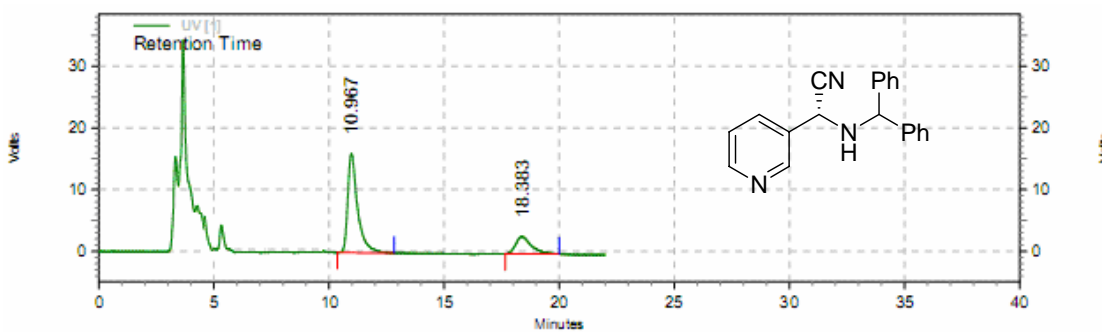

UV [1] Results

| Retention Time | Area   | Area % | Height | Height % |
|----------------|--------|--------|--------|----------|
| 10.967         | 477345 | 78.19  | 16063  | 85.12    |
| 18.383         | 133177 | 21.81  | 2809   | 14.88    |

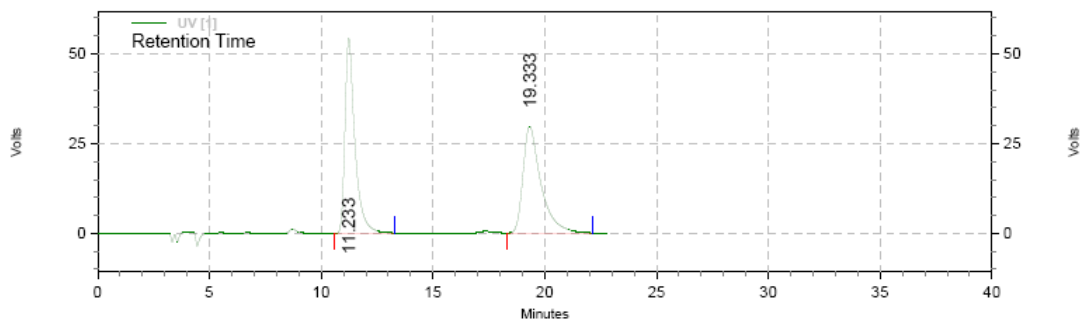

UV [1] Results

| Retention Time | Area    | Area % | Height | Height % |
|----------------|---------|--------|--------|----------|
| 11.233         | 1681989 | 50.27  | 54388  | 64.67    |
| 19.333         | 1663894 | 49.73  | 29718  | 35.33    |

Table 2, entry 24

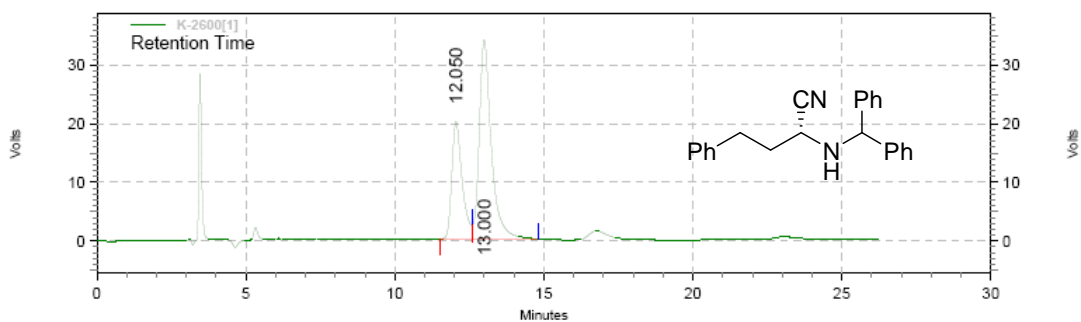

**K-2600[1] Results**

| Retention Time | Area   | Area % | Height | Height % |
|----------------|--------|--------|--------|----------|
| 12.050         | 479903 | 33.33  | 19998  | 37.06    |
| 13.000         | 960152 | 66.67  | 33963  | 62.94    |

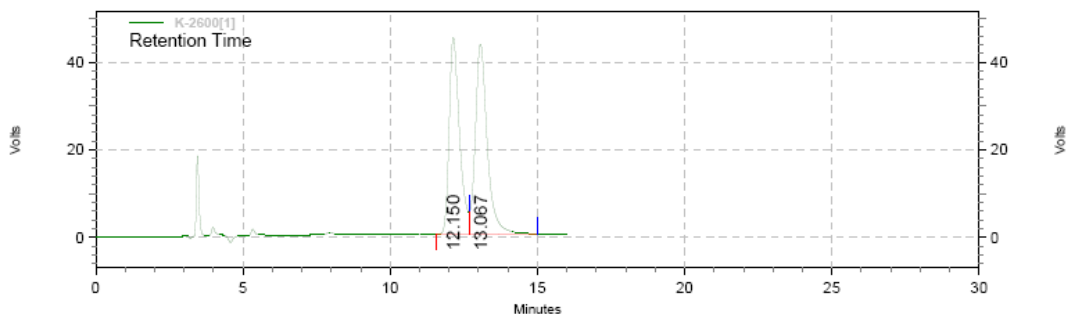

**K-2600[1] Results**

| Retention Time | Area    | Area % | Height | Height % |
|----------------|---------|--------|--------|----------|
| 12.150         | 1096697 | 47.35  | 44898  | 50.86    |
| 13.067         | 1219420 | 52.65  | 43374  | 49.14    |

## 1-12. References:

- (1) C. S. J. Cazin, M. Veith, P. Braunstein, R. B Bedford, *Synthesis*, **2005**, 622.
- (2) Lundgren, S.; Lutsenko, S.; Jonsson, C.; Moberg, C. *Org. Lett.* **2003**, 5, 3663.
